# Supplementary material for: [4 + 2] cycloaddition reactions of β-naphtha-1-thioquinones generated from 2-naphthols and DAST
Source: Royal Society of Chemistry journal article supplement (doi:10.1039/d2ob01044e), 2022-01-01
Supplement: d2ob01044e1.pdf [file d2ob01044e1.pdf]

## Supporting Information

### [4 + 2] Cycloaddition Reactions of $\beta$ -Naphtha-1-thioquinones

#### Generated from 2-Naphthols and DAST

Yang Geng,<sup>a, b</sup> Xianying Gao,<sup>a</sup> Apeng Liang,<sup>a</sup> Jingya Li,<sup>a</sup> Dapeng Zou,<sup>\*a</sup> Yangjie Wu<sup>\*a</sup> and Yusheng Wu<sup>\*a, c</sup>

<sup>a</sup>College of Chemistry and Green Catalysis Center, Zhengzhou University, No. 100, science Avenue, Zhengzhou, Henan 450001, People's Republic of China. **Tel.:** (+86)-371-6776-6865; **fax:** (+86)-371-6776-3390; **e-mail:** [zdp@zzu.edu.cn](mailto:zdp@zzu.edu.cn) or [wyl@zzu.edu.cn](mailto:wyl@zzu.edu.cn)

<sup>c</sup>Tetranov International, Inc., 100 Jersey Avenue, Suite A340, New Brunswick, New Jersey 08901, United States. **Corresponding author. Tel.:** (+ 1)-732-253-7326; **fax:** (+ 1)-732-253-7327; **e-mail:** [yusheng.wu@tetranovglobal.com](mailto:yusheng.wu@tetranovglobal.com)

## Table of Contents

|                                                              |    |
|--------------------------------------------------------------|----|
| 1. Experimental section .....                                | 1  |
| 1.1 Materials and instrumentation .....                      | 1  |
| 1.2 Synthetic procedures .....                               | 1  |
| 2. Results and Discussion .....                              | 2  |
| 2.1 Reaction Development and Optimization .....              | 2  |
| 2.2 Analytical data .....                                    | 6  |
| 2.3 <sup>1</sup> H NMR and <sup>13</sup> C NMR spectra ..... | 19 |
| 2.4 HRMS spectra .....                                       | 69 |
| 2.5 Details for Single Crystal X-ray Analysis .....          | 86 |
| 3. References .....                                          | 88 |

## 1. Experimental section

### 1.1 Materials and instrumentation

All manipulations were carried out in glass reaction tubes equipped with magnetic stir bars under argon atmosphere. Unless otherwise mentioned, solvents and reagents were purchased from commercial sources and used as received. Analytical thin-layer chromatography was performed using glass plates pre-coated with 0.25 mm 230-400 mesh silica gel impregnated with a fluorescent indicator (254 nm). Thin layer chromatography plates were visualized by exposure to ultraviolet light. Melting points were recorded by XT4A micro Melting point Measurement Instruments, thermometer was unrevised. The transformation progress and Mass spectra were indicated by LC-MSD-Trap-XCT instrument. High-resolution mass spectrometry (HRMS) data were obtained on an Agilent Technologies 1290-6540 UHPLC/AccurateMass Quadrupole Time-of Flight (Q-TOF) LC/MS using ESI as the ion source. X-ray analysis was performed with a single-crystal X-ray diffractometer. Moreover, NMR spectra were obtained on Bruker AVANCE III 400 systems using CDCl<sub>3</sub> or DMSO-d<sub>6</sub> as solvent, TMS as internal standard substance, with proton and carbon resonances at 400 and 100 MHz, respectively.

### 1.2 Synthetic procedures

General Procedure A: Synthesis of the products of **3a-3q**.

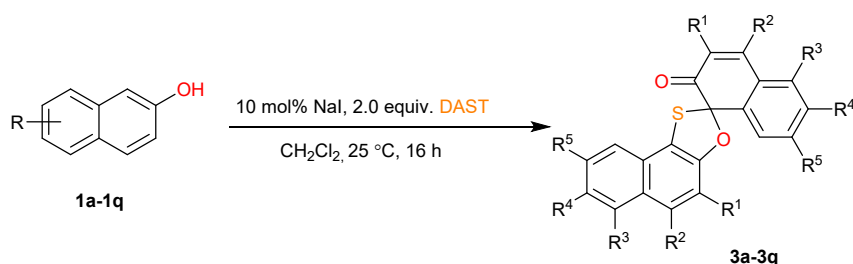

A dried glass reaction tube equipped with a magnetic stir bar was charged with 2-naphthol **1** (1.0 mmol), NaI (15 mg, 0.1 mmol) and CH<sub>2</sub>Cl<sub>2</sub> (5 mL). Then DAST (0.26 mL, 2.0 mmol) was slowly injected by syringe, the mixture was stirred at room temperature for 16 h. The reaction progress was monitored by TLC. The reaction mixture was added with saturated NaHCO<sub>3</sub> solution and extracted with CH<sub>2</sub>Cl<sub>2</sub> (5.0 mL). The combined organic phase was washed with brine, dried over anhydrous Na<sub>2</sub>SO<sub>4</sub>, and concentrated, and the residue was purified by flash column chromatography to give the pure product. The products were characterized by <sup>1</sup>H NMR, <sup>13</sup>C NMR and HRMS.

**General Procedure B:** Synthesis of compounds **2a**, **2c** and **2d**.

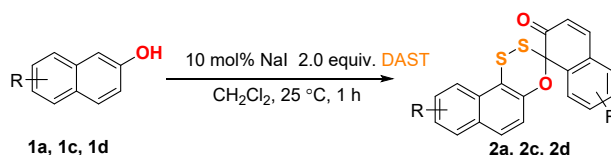

A dried glass reaction tube equipped with a magnetic stir bar was charged with 2-naphthol **1** (1.0 mmol), NaI (15 mg, 0.1 mmol) and CH<sub>2</sub>Cl<sub>2</sub> (5 mL). Then DAST (0.26 mL, 2.0 mmol) was slowly injected by syringe, the mixture was stirred at room temperature for 1 h. Then the reaction mixture was added with saturated NaHCO<sub>3</sub> solution and extracted with CH<sub>2</sub>Cl<sub>2</sub> (5.0 mL). The combined organic phase was washed with brine, dried over anhydrous Na<sub>2</sub>SO<sub>4</sub>, concentrated, and the residue was purified by flash column chromatography to give the pure product. The products were characterized by <sup>1</sup>H NMR, <sup>13</sup>C NMR and HRMS.

**General Procedure C: Synthesis of the compounds 5a-5ag.**

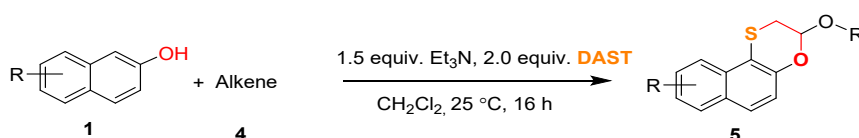

A dried glass reaction tube equipped with a magnetic stir bar was charged with 2-naphthol substrate **1** (1.0 mmol), **4** (3.0 mmol) and Et<sub>3</sub>N (1.5 mmol). Then DAST (0.26 mL, 2.0 mmol) was slowly injected by syringe, the mixture was stirred at room temperature for 16 h. The reaction progress was monitored by TLC. After the reaction finished, the reaction mixture was added with saturated NaHCO<sub>3</sub> solution and extracted with CH<sub>2</sub>Cl<sub>2</sub> (5.0 mL). The combined organic phase was washed with brine, dried over anhydrous Na<sub>2</sub>SO<sub>4</sub>, concentrated, and the residue was purified by flash column chromatography to give the pure product. The products were characterized by <sup>1</sup>H NMR, <sup>13</sup>C NMR and HRMS.

## 2. Results and Discussion

### 2.1 Reaction Development and Optimization

Table S1. Additive screening<sup>[a],[b]</sup>

| entry | cat. | time (h) | conversion rate |    |    | yield <sup>[b]</sup> |
|-------|------|----------|-----------------|----|----|----------------------|
| 1a    |      |          | 1a              | 2a | 3a |                      |
|       |      |          |                 |    |    |                      |

|    |                   |    |     |     |     |     |
|----|-------------------|----|-----|-----|-----|-----|
| 1  | --                | 18 | 20% | 50% | 20% | 9%  |
| 2  | --                | 48 | 0   | 5%  | 80% | 73% |
| 3  | CuI               | 16 | 0   | 0   | 85% | 76% |
| 4  | ZnI <sub>2</sub>  | 16 | 0   | 0   | 87% | 73% |
| 5  | KI                | 16 | 0   | 0   | 78% | 73% |
| 6  | NaI               | 16 | 0   | 0   | 87% | 82% |
| 7  | CuCl              | 16 | 0   | 0   | 83% | 61% |
| 8  | CuBr              | 16 | 0   | 0   | 78% | 60% |
| 9  | CuCl <sub>2</sub> | 16 | 0   | 0   | 79% | 68% |
| 10 | CuBr <sub>2</sub> | 16 | 0   | 0   | 74% | 54% |
| 11 | NaCl              | 16 | 20% | 16% | 44% | 10% |

[a] Reaction conditions: **1a** (1.0 mmol), additive (10 mol%), DAST (2.0 mmol), 5.0 mL of CH<sub>2</sub>Cl<sub>2</sub>, 25 °C. [b] Yields were determined by HPLC external standard method.

**Table S2. Solvent screening**<sup>[a],[b]</sup>

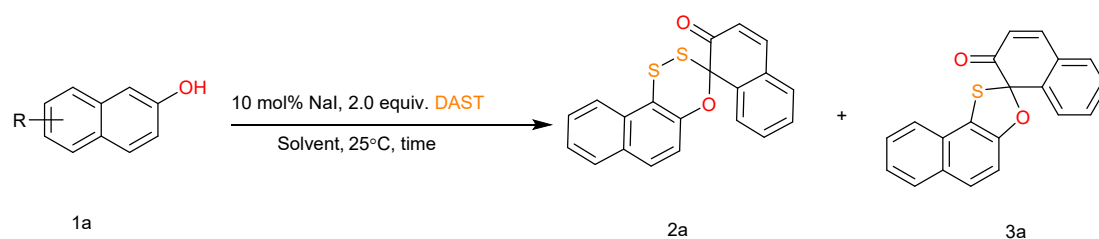

| entry | solvent            | conversion rate |    |    | yield <sup>[b]</sup> |
|-------|--------------------|-----------------|----|----|----------------------|
|       |                    | 1a              | 2a | 3a |                      |
| 1     | DCE                | 0               | 0  | 87 | 79                   |
| 2     | THF                | 0               | 36 | 51 | 41                   |
| 3     | 1,4-dioxane        | 0               | 28 | 59 | 38                   |
| 4     | CH <sub>3</sub> CN | 0               | 0  | 86 | 77                   |

[a] Reaction conditions: **1a** (1.0 mmol), NaI (10 mol%), DAST (2.0 mmol), 5.0 mL of solvent, 25 °C.

[b] Yields were determined by HPLC external standard method.

**Table S3. Dosage of DAST screening<sup>[a],[b]</sup>**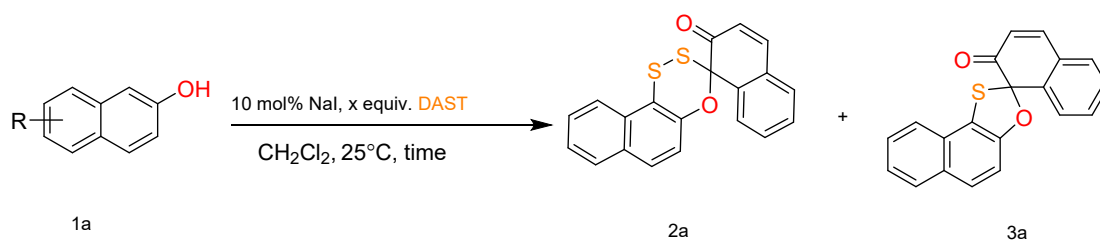

| entry | DAST<br>(x) equiv. | conversion rate |    |    | yield <sup>[b]</sup> |
|-------|--------------------|-----------------|----|----|----------------------|
|       |                    | 1a              | 2a | 3a |                      |
| 1     | 1.0                | 0               | 0  | 82 | 70                   |
| 2     | 1.5                | 0               | 0  | 86 | 74                   |
| 3     | 3.0                | 0               | 0  | 78 | 65                   |

[a] Reaction conditions: **1a** (1.0 mmol), NaI (10 mol%), DAST (x equiv.), 5.0 mL of CH<sub>2</sub>Cl<sub>2</sub>, 25 °C, 16 h. [b] Yields were determined by HPLC external standard method.

**Table S4. Dosage of NaI screening<sup>[a],[b]</sup>**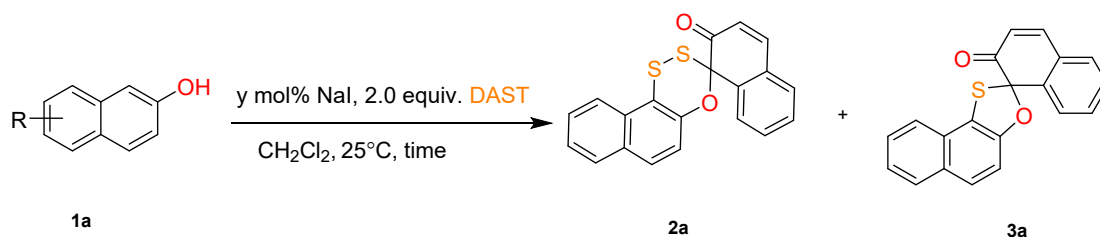

| entry | NaI<br>(y) mol% | conversion rate |    |    | Yield <sup>[b]</sup> |
|-------|-----------------|-----------------|----|----|----------------------|
|       |                 | 1a              | 2a | 3a |                      |
| 1     | 1.0             | 1               | 28 | 53 | 42                   |
| 2     | 5.0             | 0               | 0  | 72 | 65                   |
| 3     | 20.0            | 0               | 0  | 86 | 79                   |
| 4     | 40.0            | 0               | 0  | 80 | 71                   |

[a] Reaction conditions: **1a** (1.0 mmol), NaI (y mol%), DAST (2.0 mmol), 5 mL of solvent, 25 °C, 16 h. [b] Yields were determined by HPLC external standard method.

**Table S5. DAST-Type reagents screening<sup>[a],[b]</sup>**

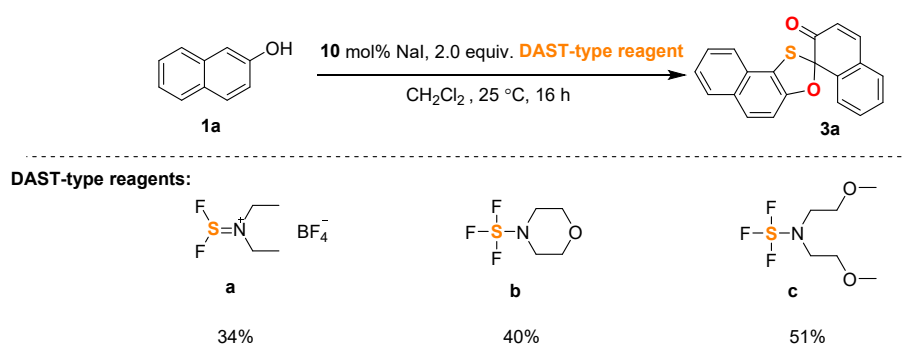

[a] Reaction conditions: **1a** (1 mmol), NaI (10 mol%), DAST-Type reagent (2.0 mmol), 5 mL of CH<sub>2</sub>Cl<sub>2</sub>, 25 °C, 16 h. [b] Yields were determined by HPLC external standard method.

**Table S6. Base and NaI screening<sup>[a],[b]</sup>**

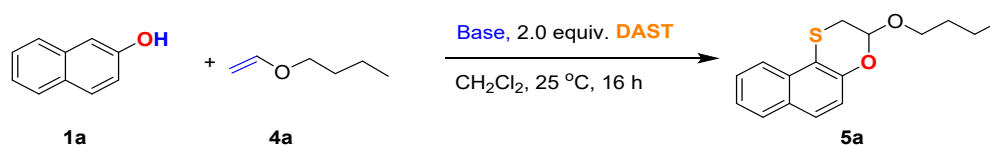

| entry | NaI     | Base (3.0 eq.)    | Yield <sup>[b]</sup> |
|-------|---------|-------------------|----------------------|
| 1     | 10 mol% | --                | 42%                  |
| 2     | 10 mol% | Et <sub>3</sub> N | 75%                  |
| 3     | --      | Et <sub>3</sub> N | 76%                  |
| 4     | --      | DIPEA             | 73%                  |
| 5     | --      | Pyridine          | 45%                  |
| 6     | --      | --                | 15%                  |

[a] Reaction conditions: **1a** (1 mmol), **4a** (3.0 eq.), NaI (x mol%), base (3.0 equiv.) DAST (2.0 mmol), 5 mL of CH<sub>2</sub>Cl<sub>2</sub>, 25 °C, 16 h. [b] Yields were determined by HPLC.

**Table S7. Dosage of the olefin and Et<sub>3</sub>N screening<sup>[a],[b]</sup>**

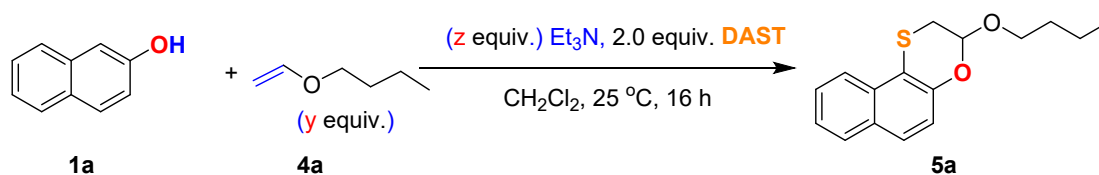

| entry | 4a (y equiv.) | Et <sub>3</sub> N (z equiv.) | yield <sup>[b]</sup> |
|-------|---------------|------------------------------|----------------------|
| 1     | 3.0           | 1.0                          | 68%                  |
| 2     | <b>3.0</b>    | <b>1.5</b>                   | <b>77%</b>           |
| 3     | 3.0           | 2.0                          | 74%                  |
| 4     | 3.0           | 3.0                          | 76%                  |
| 5     | 1.0           | 1.5                          | 69%                  |
| 6     | 2.0           | 1.5                          | 72%                  |
| 7     | 5.0           | 1.5                          | 65%                  |

[a] Reaction conditions: **1a** (1 mmol), **4a** (y equiv.) base (z equiv.), DAST (2.0 mmol), 5 mL of CH<sub>2</sub>Cl<sub>2</sub>, 25 °C, 16 h. [b] Yields were determined by HPLC.

## 2.2 Analytical data

### 2.2.1 Analytical Date of 3a-3q

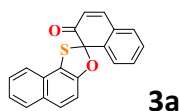

**2H-spiro[naphthalene-1,2'-naphtho[1,2-d][1,3]oxathiol]-2-one<sup>1,2</sup> (3a, yield 75%):** Orange solid, m.p.: 160 – 162 °C. <sup>1</sup>H NMR (400 MHz, DMSO-d<sub>6</sub>, ppm): δ = 7.99 - 7.96 (m, 2H), 7.87 (d, *J* = 8.8 Hz, 1H), 7.74 (d, *J* = 10.1 Hz, 1H), 7.62 - 7.43 (m, 6H), 7.36 (d, *J* = 8.1 Hz, 1H), 6.36 (d, *J* = 10.0 Hz, 1H). <sup>13</sup>C NMR (100 MHz, DMSO-d<sub>6</sub>, ppm): δ = 189.0, 154.0, 144.5, 138.3, 131.0, 130.5, 130.2, 130.0, 129.2, 128.8, 127.9, 127.8, 127.5, 126.4, 124.5, 123.8, 122.9, 114.6, 112.1, 95.1. <sup>1</sup>H NMR (400 MHz, CDCl<sub>3</sub>, ppm): δ = 8.0 (dd, *J* = 1.3 Hz, 7.4 Hz, 1H), 7.81 (d, *J* = 8.2 Hz, 1H), 7.69 (d, *J* = 8.8 Hz, 1H), 7.47 - 7.30 (m, 8H), 6.27 (d, *J* = 10.1 Hz, 1H). <sup>13</sup>C NMR (100 MHz, CDCl<sub>3</sub>, ppm): δ = 189.5, 154.3, 143.5, 139.4, 130.7, 130.6, 130.0, 129.6, 129.5, 128.8, 127.6, 127.0, 126.9, 124.3, 124.2, 123.8, 115.5, 111.9, 95.6. HRMS (ESI-TOF): Calcd for C<sub>20</sub>H<sub>13</sub>O<sub>2</sub>S [M+H]<sup>+</sup>: 317.0631; Found: 317.0636.

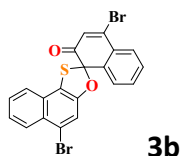

**4,5'-dibromo-2H-spiro[naphthalene-1,2'-naphtho[1,2-d][1,3]oxathiol]-2-one (3b, yield 77%).** Orange solid, m.p.: 208 – 210 °C. <sup>1</sup>H NMR (400 MHz, CDCl<sub>3</sub>, ppm): δ = 8.20 - 8.18 (m, 1H), 8.02 - 8.00 (m, 1H), 7.90 - 7.88 (m, 1H), 7.72 (s, 1H), 7.56 - 7.53 (m, 2H), 7.56 - 7.53 (m, 2H), 7.29 - 7.25 (m, 1H), 6.84 (s, 1H). <sup>13</sup>C NMR (100 MHz, CDCl<sub>3</sub>, ppm): δ = 186.1, 153.4, 141.8, 137.3, 131.8, 130.4, 130.2, 129.0, 128.9, 128.8, 128.2, 127.9, 126.9, 126.6, 125.8, 124.9, 121.2, 116.1, 115.9, 95.6. HRMS (ESI-TOF): Calcd for C<sub>20</sub>H<sub>11</sub>Br<sub>2</sub>O<sub>2</sub>S [M+H]<sup>+</sup>: 472.8841; Found: 472.8848.



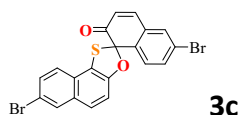

**3c**

**6,7'-dibromo-2H-spiro[naphthalene-1,2'-naphtho[1,2-d][1,3]oxathiol]-2-one (3c, yield 62%):** Orange solid, m.p.: 153 - 155 °C. <sup>1</sup>H NMR (400 MHz, CDCl<sub>3</sub>, ppm): δ = 7.98 (d, *J* = 1.6 Hz, 1H), 7.87 (d, *J* = 8.3 Hz, 1H), 7.61 - 7.58 (m, 2H), 7.50 - 7.48 (m, 2H), 7.38 (d, *J* = 8.8 Hz, 1H), 7.31 - 7.26 (m, 1H), 7.18 (d, *J* = 8.8 Hz, 1H), 6.32 (d, *J* = 10.1 Hz, 1H). <sup>13</sup>C NMR (100 MHz, CDCl<sub>3</sub>, ppm): δ = 188.3, 154.5, 142.0, 137.6, 133.4, 132.2, 131.7, 131.2, 130.8, 130.4, 128.6, 127.2, 126.9, 125.9, 125.0, 124.3, 118.1, 115.9, 112.9, 95.4. HRMS (ESI-TOF): Calcd for C<sub>20</sub>H<sub>11</sub>Br<sub>2</sub>O<sub>2</sub>S [M+H]<sup>+</sup>: 472.8841; Found: 472.8841.

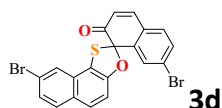

**3d**

**7,8'-dibromo-2H-spiro[naphthalene-1,2'-naphtho[1,2-d][1,3]oxathiol]-2-one (3d, yield 60%):** Orange solid, m.p.: 215 - 216 °C. <sup>1</sup>H NMR (400 MHz, CDCl<sub>3</sub>, ppm): δ = 8.14 (d, *J* = 4.8 Hz, 1H), 7.68 (dd, *J* = 4.8 Hz, 8.8 Hz, 2H), 7.57 (dd, *J* = 2.0 Hz, 8.1 Hz, 1H), 7.41 (s, 1H), 7.43 (dd, *J* = 1.8 Hz, 8.8 Hz, 1H), 7.39 (d, *J* = 8.9 Hz, 1H), 7.32 (d, *J* = 10.1 Hz, 1H), 7.22 (d, *J* = 8.1 Hz, 1H), 6.29 (d, *J* = 10.1 Hz, 1H). <sup>13</sup>C NMR (100 MHz, CDCl<sub>3</sub>, ppm): δ = 188.2, 154.9, 142.5, 140.6, 133.3, 130.8, 130.4, 130.2, 129.9, 129.1, 128.3, 127.9, 126.4, 125.3, 123.9, 121.3, 114.6, 112.3, 95.1. HRMS (ESI-TOF): Calcd for C<sub>20</sub>H<sub>11</sub>Br<sub>2</sub>O<sub>2</sub>S [M+H]<sup>+</sup>: 472.8841; Found: 472.8840.

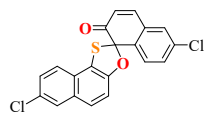

**3e**

**6,7'-dichloro-2H-spiro[naphthalene-1,2'-naphtho[1,2-d][1,3]oxathiol]-2-one (3e, yield 69%):** Orange solid, m.p.: 188 - 190 °C. <sup>1</sup>H NMR (400 MHz, CDCl<sub>3</sub>, ppm): δ = 7.93 (d, *J* = 8.3 Hz, 1H), 7.78 (d, *J* = 1.8 Hz, 1H), 7.59 (d, *J* = 8.8 Hz, 1H), 7.42 - 7.23 (m, 6H), 6.31 (d, *J* = 10.1 Hz, 1H). <sup>13</sup>C NMR (100 MHz, CDCl<sub>3</sub>, ppm): δ = 188.4, 154.5, 142.1, 137.1, 136.2, 131.2, 131.0, 130.5, 130.1, 129.3, 128.4, 128.0, 127.5, 127.0, 126.9, 125.8, 125.0, 115.9, 112.9, 95.3. HRMS (ESI-TOF): Calcd for C<sub>20</sub>H<sub>11</sub>Cl<sub>2</sub>O<sub>2</sub>S [M+H]<sup>+</sup>: 384.9851; Found: 384.9848.

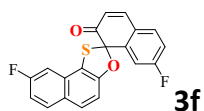

**3f**

**7,8'-difluoro-2H-spiro[naphthalene-1,2'-naphtho[1,2-d][1,3]oxathiol]-2-one. (3f, yield 28%):** Orange solid, m.p.: 163 - 165 °C. <sup>1</sup>H NMR (400 MHz, CDCl<sub>3</sub>, ppm): δ = 7.81 (dd, *J* = 5.6 Hz, 8.8 Hz, 1H), 7.72 - 7.68 (m, 2H), 7.36 - 7.33 (m, 3H), 7.14 - 7.30 (m, 2H), 6.92 (dd, *J* = 1.7 Hz, 9.9 Hz, 1H), 6.24 (d, *J* = 10.1 Hz, 1H). <sup>13</sup>C NMR (100 MHz, CDCl<sub>3</sub>, ppm): δ = 188.8, 165.2, 162.6 (d, *J* = 18.5 Hz), 160.1, 155.0, 142.6, 141.9 (d, *J* = 8.1 Hz), 131.5 (dd, *J* = 9.5 Hz, 17.1 Hz, 1H), 129.6 (d, *J* = 10.1 Hz), 127.9, 127.7, 125.8 (d, *J* = 3.4 Hz), 122.8 (d, *J* = 2.9 Hz), 117.3, 117.0, 114.8 (dd, *J* = 10.5 Hz, 35.97 Hz, 1H), 111.2 (d, *J* = 2.5 Hz), 107.9, 107.7, 95.1. HRMS (ESI-TOF): Calcd for C<sub>20</sub>H<sub>10</sub>F<sub>2</sub>NaO<sub>2</sub>S

[M+Na]<sup>+</sup>: 375.0262; Found: 375.0262.

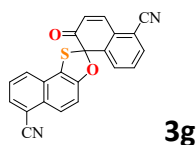

**2-oxo-2H-spiro[naphthalene-1,2'-naphtho[1,2-d][1,3]oxathiole]-5,6'-dicarbonitrile (3g, yield 66%):** Orange solid, m.p.: 248 - 250 °C. <sup>1</sup>H NMR (400 MHz, CDCl<sub>3</sub>, ppm): δ = 8.04 (d, *J* = 7.8 Hz, 1H), 7.86 - 7.80 (m, 3H), 7.58 - 7.51 (m, 3H), 7.41 - 7.36 (m, 2H), 6.42 (d, *J* = 10.1 Hz, 1H). <sup>13</sup>C NMR (100 MHz, CDCl<sub>3</sub>, ppm): δ = 187.9, 157.0, 142.7, 141.9, 136.1, 135.4, 134.7, 133.2, 131.1, 131.0, 130.5, 129.6, 128.1, 125.0, 123.3, 119.5, 116.0, 114.7, 113.9, 113.1, 106.9, 93.5. HRMS (ESI-TOF): Calcd for C<sub>22</sub>H<sub>10</sub>N<sub>2</sub>NaO<sub>2</sub>S [M+Na]<sup>+</sup>: 389.0355; Found: 389.0354.

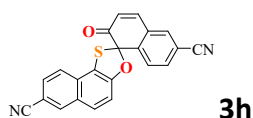

**2-oxo-2H-spiro[naphthalene-1,2'-naphtho[1,2-d][1,3]oxathiole]-6,7'-dicarbonitrile (3h, yield 71%):** Orange solid, m.p.: 236 - 238 °C. <sup>1</sup>H NMR (400 MHz, CDCl<sub>3</sub>, ppm): <sup>1</sup>H NMR (400 MHz, DMSO-d<sub>6</sub>, ppm): δ = 8.65 (s, 1H), 8.17 - 8.14 (m, 2H), 8.06 - 8.01 (m, 2H), 7.80 - 7.77 (m, 2H), 7.71 (d, *J* = 8.9 Hz, 1H), 7.55 (d, *J* = 8.6 Hz, 1H), 6.51 (d, *J* = 10.1 Hz, 1H). <sup>13</sup>C NMR (100 MHz, CDCl<sub>3</sub> and DMSO-d<sub>6</sub>, ppm): δ = 187.4, 156.0, 142.6, 142.4, 135.1, 133.9, 133.3, 130.3, 129.2, 129.1, 129.0, 127.7, 127.4, 125.3, 124.3, 118.7, 117.4, 115.5, 113.6, 113.5, 107.1, 94.7. HRMS (ESI-TOF): Calcd for C<sub>22</sub>H<sub>11</sub>N<sub>2</sub>O<sub>2</sub>S [M+H]<sup>+</sup>: 367.0541; Found: 367.0538.

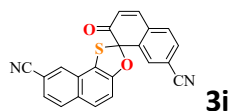

**2-oxo-2H-spiro[naphthalene-1,2'-naphtho[1,2-d][1,3]oxathiole]-7,8'-dicarbonitrile (3i, yield 75%):** Orange solid, m.p.: 220 - 222 °C. <sup>1</sup>H NMR (400 MHz, CDCl<sub>3</sub>, ppm): δ = 8.28 (s, 1H), 7.93 (d, *J* = 8.6 Hz, 1H), 7.80 - 7.75 (m, 2H), 7.70 (s, 1H), 7.56 - 7.50 (m, 3H), 7.43 (d, *J* = 10.1 Hz, 1H), 6.45 (d, *J* = 10.1 Hz, 1H). <sup>13</sup>C NMR (100 MHz, CDCl<sub>3</sub>, ppm): δ = 187.2, 155.3, 141.6, 139.6, 133.8, 133.3, 132.0, 130.4, 130.2, 130.1, 130.0, 128.2, 127.8, 126.4, 125.0, 118.7, 117.5, 116.4, 114.8, 114.2, 110.6, 95.0. HRMS (ESI-TOF): Calcd for C<sub>22</sub>H<sub>10</sub>N<sub>2</sub>NaO<sub>2</sub>S [M+Na]<sup>+</sup>: 389.0355; Found: 389.0351.

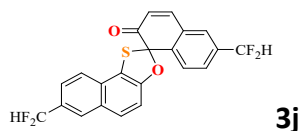

**6,7'-bis(difluoromethyl)-2H-spiro[naphthalene-1,2'-naphtho[1,2-d][1,3]oxathiole]-2-one (3j, yield 79%):** Orange solid, m.p.: 136 - 138 °C. <sup>1</sup>H NMR (400 MHz, CDCl<sub>3</sub>, ppm): δ = 8.11 (d, *J* = 8.0 Hz, 1H), 7.96 (s, 1H), 7.78 (d, *J* = 8.8 Hz, 1H), 7.61 - 7.52 (m, 3H), 7.47 - 7.38 (m, 3H), 6.90 - 7.52 (m, 2H), 6.36 (d, *J* = 10.1 Hz, 1H). <sup>13</sup>C NMR (100 MHz,

CDCl<sub>3</sub>, ppm):  $\delta$  = 188.5, 155.4, 142.6, 142.5, 141.3, 136.5, 130.3, 130.0, 129.8, 129.7, 128.6, 127.7, 127.4, 126.8, 126.4, 125.3, 124.7, 123.4, 115.9, 113.7, 112.8, 95.4. HRMS (ESI-TOF): Calcd for C<sub>22</sub>H<sub>13</sub>F<sub>4</sub>O<sub>2</sub>S [M+H]<sup>+</sup>: 417.0567; Found: 417.0566.

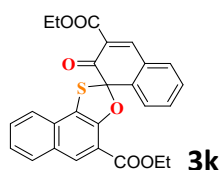

**diethyl 2-oxo-2H-spiro[naphthalene-1,2'-naphtho[1,2-d][1,3]oxathiole]-3,4'-dicarboxylate (3k, yield 31%):** Orange solid, m.p.: 140 - 142 °C. <sup>1</sup>H NMR (400 MHz, CDCl<sub>3</sub>, ppm):  $\delta$  = 8.29 (s, 1H), 8.10 (s, 1H), 8.03 (d, *J* = 7.7 Hz, 1H), 7.81 (d, *J* = 8.3 Hz, 1H), 7.51 - 7.46 (m, 1H), 7.44 - 7.39 (m, 3H), 7.33 - 7.30 (m, 1H), 7.24 (d, *J* = 8.2 Hz, 1H), 4.41 - 4.32 (m, 2H), 4.30 - 4.20 (m, 2H), 1.33 (t, *J* = 7.1 Hz, 3H), 1.24 (t, 7.1 Hz, 3H). <sup>13</sup>C NMR (100 MHz, CDCl<sub>3</sub>, ppm):  $\delta$  = 184.0, 164.5, 163.7, 152.5, 148.5, 139.9, 132.7, 131.4, 130.8, 130.6, 130.4, 129.9, 129.6, 129.1, 127.9, 127.3, 125.1, 124.4, 117.9, 116.2, 96.8, 61.7, 61.3, 14.4, 14.2. HRMS (ESI-TOF): Calcd for C<sub>26</sub>H<sub>21</sub>O<sub>6</sub>S [M+H]<sup>+</sup>: 461.1053; Found: 461.1051.

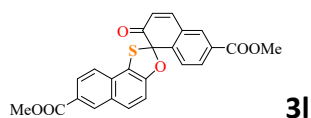

**dimethyl 2-oxo-2H-spiro[naphthalene-1,2'-naphtho[1,2-d][1,3]oxathiole]-6,7'-dicarboxylate (3l, yield 62%):** Orange solid, m.p.: 228 - 229 °C. <sup>1</sup>H NMR (400 MHz, CDCl<sub>3</sub>, ppm):  $\delta$  = 8.59 (s, 1H), 8.13 - 8.00 (m, 4H), 7.83 (d, *J* = 8.8 Hz, 1H), 7.45 (dd, *J* = 4.8 Hz, 8.8 Hz, 2H), 7.33 (d, *J* = 8.7 Hz, 1H), 6.35 (d, *J* = 10.0 Hz, 1H), 3.96 (s, 3H), 3.97 (s, 3H). <sup>13</sup>C NMR (100 MHz, CDCl<sub>3</sub>, ppm): 188.4, 166.9, 165.7, 156.0, 143.2, 142.8, 131.9, 131.5, 130.8, 130.6, 129.8, 129.7, 129.6, 127.1, 126.6, 126.1, 124.5, 124.4, 115.8, 112.7, 95.5, 52.6, 52.3. HRMS (ESI-TOF): Calcd for C<sub>24</sub>H<sub>17</sub>O<sub>6</sub>S [M+H]<sup>+</sup>: 433.0740; Found: 433.0741.

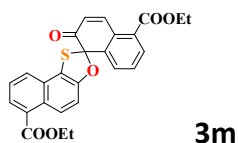

**diethyl 2-oxo-2H-spiro[naphthalene-1,2'-naphtho[1,2-d][1,3]oxathiole]-5,6'-dicarboxylate (3l, yield 55%):** Orange solid, m.p.: 140 - 142 °C. <sup>1</sup>H NMR (400 MHz, CDCl<sub>3</sub>, ppm):  $\delta$  = 8.82 (d, *J* = 9.3 Hz, 1H), 8.50 (d, *J* = 10.6 Hz, 1H), 8.17 (dd, *J* = 0.5 Hz, 7.8 Hz, 1H), 8.04 (dd, *J* = 2.0 Hz, 6.5 Hz, 1H), 7.98 (dd, *J* = 1.2 Hz, 7.8 Hz, 1H), 7.52 - 7.42 (m, 4H), 6.38 (d, *J* = 10.6 Hz, 1H), 4.49 - 4.41 (m, 4H), 1.47 - 1.42 (m, 6H). <sup>13</sup>C NMR (100 MHz, CDCl<sub>3</sub>, ppm):  $\delta$  = 188.4, 167.3, 166.2, 154.2, 140.7, 140.0, 132.0, 130.2, 130.1, 130.0, 129.42, 129.40, 129.3, 128.6, 128.4, 125.9, 125.8, 125.1, 116.3, 113.2, 95.7, 61.9, 61.2, 14.4, 14.3. HRMS (ESI-TOF): Calcd for C<sub>26</sub>H<sub>21</sub>O<sub>6</sub>S [M+H]<sup>+</sup>: 461.1053; Found: 461.1051.

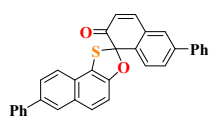

**3o**

**6,7'-diphenyl-2H-spiro[naphthalene-1,2'-naphtho[1,2-d][1,3]oxathiol]-2-one (3o, yield 65%):** Orange solid, m.p.: 166 - 168 °C.  $^1\text{H}$  NMR (400 MHz,  $\text{CDCl}_3$ , ppm):  $\delta$  = 8.08 (d,  $J$  = 8.0 Hz, 1H), 8.02 (s, 1H), 7.75 (d,  $J$  = 8.8 Hz, 1H), 7.71 - 7.55 (m, 7H), 7.49 - 7.35 (m, 9H), 6.33 (d,  $J$  = 10.0 Hz, 1H).  $^{13}\text{C}$  NMR (100 MHz,  $\text{CDCl}_3$ , ppm):  $\delta$  = 189.3, 154.5, 143.5, 143.2, 140.8, 139.5, 137.8, 137.1, 130.9, 130.0, 129.2, 129.0, 128.9, 128.3, 128.2, 128.0, 127.9, 127.5, 127.4, 127.3, 127.1, 126.8, 126.7, 124.9, 124.2, 115.6, 112.4, 95.7. HRMS (ESI-TOF): Calcd for  $\text{C}_{32}\text{H}_{21}\text{O}_2\text{S}$   $[\text{M}+\text{H}]^+$ : 469.1257; Found: 469.1260.

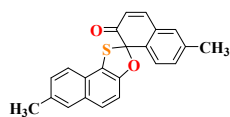

**3p**

**6,7'-dimethyl-2H-spiro[naphthalene-1,2'-naphtho[1,2-d][1,3]oxathiol]-2-one (3p, yield 45%):** Orange foam.  $^1\text{H}$  NMR (400 MHz,  $\text{CDCl}_3$ , ppm):  $\delta$  = 7.86 (d,  $J$  = 7.9 Hz, 1H), 7.56 (d,  $J$  = 8.9 Hz, 2H), 7.32 (d,  $J$  = 8.8 Hz, 1H), 7.27 - 7.18 (m, 4H), 7.09 (s, 1H), 6.23 (d,  $J$  = 10.0 Hz, 1H), 2.43 (s, 3H), 2.35 (s, 3H).  $^{13}\text{C}$  NMR (100 MHz,  $\text{CDCl}_3$ , ppm):  $\delta$  = 189.7, 153.8, 143.6, 140.1, 136.4, 133.7, 131.3, 130.8, 130.2, 129.4, 129.3, 127.7, 127.0, 126.9, 126.8, 124.1, 123.8, 115.5, 111.9, 95.7, 21.6, 21.2. HRMS (ESI-TOF): Calcd for  $\text{C}_{22}\text{H}_{17}\text{O}_2\text{S}$   $[\text{M}+\text{H}]^+$ : 345.0944; Found: 345.0947.

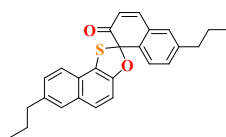

**3q**

**6,7'-dipropyl-2H-spiro[naphthalene-1,2'-naphtho[1,2-d][1,3]oxathiol]-2-one (3q, yield 48%):** Orange foam.  $^1\text{H}$  NMR (400 MHz,  $\text{CDCl}_3$ , ppm):  $\delta$  = 7.89 (d,  $J$  = 7.9 Hz, 1H), 7.61 - 7.57 (m, 2H), 7.34 - 7.23 (m, 5H), 7.12 (d,  $J$  = 1.4 Hz, 1H), 6.24 (d,  $J$  = 10.0 Hz, 1H), 2.69 (t,  $J$  = 7.3 Hz, 2H), 2.60 (t,  $J$  = 7.3 Hz, 2H), 1.71 - 1.59 (m, 4H), 0.96 - 0.92 (m, 6H).  $^{13}\text{C}$  NMR (100 MHz,  $\text{CDCl}_3$ , ppm):  $\delta$  = 189.7, 153.9, 144.9, 143.7, 138.5, 136.6, 130.8, 129.6, 129.4, 128.6, 127.3, 127.2, 126.9, 126.8, 124.3, 124.2, 123.7, 115.5, 111.8, 95.7, 38.0, 37.6, 24.5, 24.3, 13.8. HRMS (ESI-TOF): Calcd for  $\text{C}_{26}\text{H}_{25}\text{O}_2\text{S}$   $[\text{M}+\text{H}]^+$ : 401.1570; Found: 401.1577.

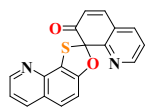

**3r**

**6H-spiro[quinoline-5,2'-[1,3]oxathiololo[5,4-h]quinolin]-6-one (3r, yield 25%):** Orange foam;  $^1\text{H}$  NMR (400 MHz,  $\text{CDCl}_3$ , ppm):  $\delta$  = 8.55 (dd,  $J$  = 1.4 Hz, 4.8 Hz, 1H), 7.98 (d,  $J$  = 7.2 Hz, 1H), 7.78 (dd,  $J$  = 1.4 Hz, 4.8 Hz, 1H), 7.51 - 7.47 (m, 2H), 7.44 - 7.40 (m, 2H), 7.10 (d,  $J$  = 9.3 Hz, 1H), 6.79 (t,  $J$  = 6.8 Hz, 1H), 6.47 (d,  $J$  = 10.2 Hz, 1H).  $^{13}\text{C}$  NMR (100 MHz,  $\text{CDCl}_3$ , ppm):  $\delta$  = 186.3, 173.3, 160.0, 150.5, 142.4, 141.6, 138.8, 137.3, 136.8, 133.9, 126.4, 126.1, 125.2, 125.1, 123.5, 110.9, 102.5, 86.1. HRMS (ESI-TOF): Calcd for  $\text{C}_{18}\text{H}_{11}\text{N}_2\text{O}_2\text{S}$   $[\text{M}+\text{H}]^+$ : 319.0536; Found: 319.0529.

## 2.2.2 Analytical Date of compounds of 2a, 2c and 2d.

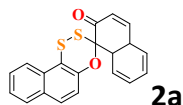

**4a,8a-dihydro-2H-spiro[naphthalene-1,3'-naphtho[1,2-e][1,3,4]oxadithiin]-2-one<sup>1,2</sup>** (**2a**, yield 25%): Yellow solid, m.p.: 155-156 °C. <sup>1</sup>H NMR (400 MHz, DMSO-d<sub>6</sub>, ppm): δ = 8.10 (d, *J* = 8.4 Hz, 1H), 7.99 (d, *J* = 7.8 Hz, 1H), 7.92 (d, *J* = 9.0 Hz, 1H), 7.75 - 7.72 (m, 3H), 7.67 - 7.63 (m, 3H), 7.56 - 7.52 (m, 1H), 7.44 (d, *J* = 9.0 Hz, 1H), 6.34 (d, *J* = 10.0 Hz, 1H). <sup>13</sup>C NMR (100 MHz, DMSO-d<sub>6</sub>, ppm): δ = 186.8, 151.9, 142.3, 134.3, 130.8, 130.7, 130.5, 129.7, 128.5, 128.4, 127.4, 127.3, 124.9, 123.0, 122.1, 121.2, 109.8, 83.8. HRMS (ESI-TOF): Calcd for C<sub>20</sub>H<sub>13</sub>O<sub>2</sub>S<sub>2</sub> [M+H]<sup>+</sup>: 349.0351; Found: 349.0374.

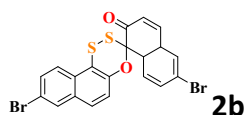

**6,8'-dibromo-4a,8a-dihydro-2H-spiro[naphthalene-1,3'-naphtho[1,2-e][1,3,4]oxadithiin]-2-one<sup>2</sup>** (**2b**, yield 30%): Yellow solid, m.p.: 152-153 °C. <sup>1</sup>H NMR (400 MHz, CDCl<sub>3</sub>, ppm): δ = 8.00 (d, *J* = 9.0 Hz, 1H), 7.95 (d, *J* = 0.9 Hz, 1H), 7.65 - 7.28 (m, 5H), 7.34 - 7.28 (m, 2H), 6.30 (d, *J* = 10.0 Hz, 1H). <sup>13</sup>C NMR (100 MHz, CDCl<sub>3</sub>, ppm): δ = 186.0, 152.2, 139.8, 133.9, 133.1, 132.5, 131.7, 130.3, 130.2, 130.2, 130.2, 129.3, 127.4, 125.0, 124.6, 124.5, 122.2, 118.6, 111.2, 84.4. HRMS (ESI-TOF): Calcd for C<sub>20</sub>H<sub>11</sub>Br<sub>2</sub>O<sub>2</sub>S<sub>2</sub> [M+H]<sup>+</sup>: 504.8562; Found: 504.8562.

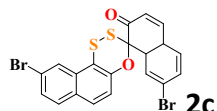

**7,9'-dibromo-4a,8a-dihydro-2H-spiro[naphthalene-1,3'-naphtho[1,2-e][1,3,4]oxadithiin]-2-one** (**2c**, yield 22%): Yellow solid, m.p.: 200 - 202 °C. <sup>1</sup>H NMR (400 MHz, CDCl<sub>3</sub>, ppm): δ = 8.31 (s, 1H), 7.86 (d, *J* = 1.8 Hz, 1H), 7.7 - 7.63 (m, 3H), 7.53 (dd, *J* = 1.7 Hz, 8.6 Hz, 1H), 7.37 - 7.33 (m, 3H), 6.29 (d, *J* = 10.0 Hz, 1H). <sup>13</sup>C NMR (100 MHz, CDCl<sub>3</sub>, ppm): δ = 186.0, 152.7, 140.2, 136.9, 133.5, 132.8, 131.1, 130.9, 130.0, 128.9, 128.4, 128.2, 127.6, 125.4, 125.1, 124.0, 124.7, 121.5, 110.1, 84.1. HRMS (ESI-TOF): Calcd for C<sub>20</sub>H<sub>11</sub>Br<sub>2</sub>O<sub>2</sub>S<sub>2</sub> [M+H]<sup>+</sup>: 504.8562; Found: 504.8563.

## 2.3.3 Analytical Date of 5a-5ag

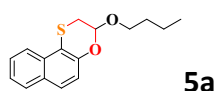

**3-butoxy-2,3-dihydronaphtho[2,1-b][1,4]oxathiine** (**5a**, yield 56%): Colorless oil; <sup>1</sup>H NMR (400 MHz, CDCl<sub>3</sub>, ppm): δ = 7.93 (d, *J* = 8.4 Hz, 1H), 7.74 (d, *J* = 7.9 Hz, 1H), 7.56 (d, *J* = 8.8 Hz, 1H), 7.57 - 7.50 (m, 1H), 7.42 - 7.39 (m, 1H), 7.09 (d, *J* = 8.8 Hz, 1H),

5.47 (dd,  $J = 2.0$  Hz, 4.6 Hz, 1H), 3.99 - 3.93 (m, 1H), 3.75 - 3.69 (m, 1H), 3.26 - 3.14 (m, 2H), 1.65 - 1.58 (m, 2H), 1.39 - 1.33 (m, 2H), 0.90 (t,  $J = 7.4$  Hz, 3H).  $^{13}\text{C}$  NMR (100 MHz,  $\text{CDCl}_3$ , ppm):  $\delta = 146.2, 130.0, 128.4, 127.2, 125.3, 124.9, 123.1, 121.6, 118.8, 110.0, 93.6, 67.6, 30.35, 27.8, 18.1, 12.7$ . HRMS (ESI-TOF): Calcd for  $\text{C}_{16}\text{H}_{18}\text{NaO}_2\text{S}$   $[\text{M}+\text{Na}]^+$ : 297.0920; Found: 297.0914.

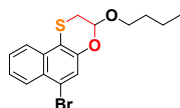

**5b**

**3-bromo-3-butoxy-2,3-dihydronaphtho[2,1-b][1,4]oxathiine (5b)**, yield 20%): Yellow oil.  $^1\text{H}$  NMR (400 MHz,  $\text{CDCl}_3$ , ppm):  $\delta = 8.15$  (d,  $J = 8.4$  Hz, 1H), 7.91 (d,  $J = 8.1$  Hz, 1H), 7.56 - 7.43 (m, 2H), 7.43 (s, 1H), 5.46 (d,  $J = 2.0$  Hz, 4.3 Hz, 1H), 3.96 - 3.90 (m, 1H), 3.73 - 3.67 (m, 1H), 3.24 - 3.12 (m, 2H), 1.65 - 1.58 (m, 2H), 1.39 - 1.30 (m, 2H), 0.90 (t,  $J = 7.4$  Hz, 3H).  $^{13}\text{C}$  NMR (100 MHz,  $\text{CDCl}_3$ , ppm):  $\delta = 146.9, 131.6, 128.0, 127.6, 127.1, 125.5, 123.6, 123.0, 119.5, 111.6, 94.5, 68.8, 31.5, 28.8, 19.2, 13.8$ . HRMS (ESI-TOF): Calcd for  $\text{C}_{16}\text{H}_{17}\text{BrO}_2\text{S}$   $[\text{M}]^+$ : 352.0127; Found: 352.0131.

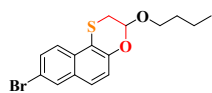

**5c**

**8-bromo-3-butoxy-2,3-dihydronaphtho[2,1-b][1,4]oxathiine (5c)**, yield 62%): Yellow oil.  $^1\text{H}$  NMR (400 MHz,  $\text{CDCl}_3$ , ppm):  $\delta = 7.89$  (d,  $J = 2.0$  Hz, 1H), 7.77 (d,  $J = 9.0$  Hz, 1H), 7.55 (dd,  $J = 2.0$  Hz, 9.0 Hz, 1H), 7.43 (d,  $J = 8.9$  Hz, 1H), 7.07 (d,  $J = 8.9$  Hz, 1H), 5.46 (dd,  $J = 2.1$  Hz, 4.5 Hz, 1H), 3.95 - 3.90 (m, 1H), 3.74 - 3.68 (m, 1H), 3.24 - 3.11 (m, 2H), 1.62 - 1.57 (m, 2H), 1.36 - 1.27 (m, 2H), 0.88 (t,  $J = 7.4$  Hz, 3H).  $^{13}\text{C}$  NMR (100 MHz,  $\text{CDCl}_3$ , ppm):  $\delta = 147.5, 130.6, 130.2, 129.6, 129.4, 125.0, 124.7, 124.4, 121.0, 118.0, 111.5, 94.5, 68.8, 31.5, 28.8, 19.2, 13.8$ . HRMS (ESI-TOF): Calcd for  $\text{C}_{16}\text{H}_{17}\text{BrNaO}_2\text{S}$   $[\text{M}+\text{Na}]^+$ : 375.0025; Found: 375.0020.

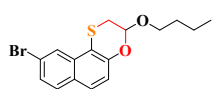

**5d**

**9-bromo-3-butoxy-2,3-dihydronaphtho[2,1-b][1,4]oxathiine (5d)**, yield 48%): Yellow oil.  $^1\text{H}$  NMR (400 MHz,  $\text{CDCl}_3$ , ppm):  $\delta = 8.05$  (d,  $J = 1.7$  Hz, 1H), 7.58 (d,  $J = 8.6$  Hz, 1H), 7.48 (d,  $J = 8.8$  Hz, 1H), 7.44 (dd,  $J = 1.8$  Hz, 8.6 Hz, 1H), 7.06 (d,  $J = 8.9$  Hz, 1H), 5.45 (dd,  $J = 2.2$  Hz, 4.5 Hz, 1H), 3.95 - 3.90 (m, 1H), 3.74 - 3.68 (m, 1H), 3.24 - 3.11 (m, 2H), 1.62 - 1.57 (m, 2H), 1.36 - 1.27 (m, 2H), 0.88 (t,  $J = 7.4$  Hz, 3H).  $^{13}\text{C}$  NMR (100 MHz,  $\text{CDCl}_3$ , ppm):  $\delta = 148.0, 132.3, 129.8, 127.9, 127.5, 125.9, 125.1, 120.9, 120.3, 110.4, 94.6, 68.8, 53.5, 31.6, 28.8, 19.2, 13.8$ . HRMS (ESI-TOF): Calcd for  $\text{C}_{16}\text{H}_{17}\text{BrNaO}_2\text{S}$   $[\text{M}+\text{Na}]^+$ : 375.0025; Found: 375.0024.

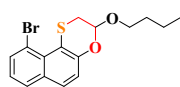

**5e**

**10-bromo-3-butoxy-2,3-dihydronaphtho[2,1-b][1,4]oxathiine (5e)**, yield 42%):

Yellow oil.  $^1\text{H}$  NMR (400 MHz,  $\text{CDCl}_3$ , ppm):  $\delta$  = 7.77 (dd,  $J$  = 1.1 Hz, 7.5 Hz, 1H), 7.67 (dd,  $J$  = 0.7 Hz, 8.0 Hz, 1H), 7.51 (d, 8.8 Hz, 1H), 7.15 - 7.09 (m, 2H), 5.53 (dd,  $J$  = 2.7 Hz, 6.1 Hz, 1H), 4.03 - 3.98 (m, 1H), 3.74 - 3.68 (m, 1H), 3.03 (dd,  $J$  = 2.7 Hz, 13.1 Hz, 1H), 2.80 (dd,  $J$  = 6.1 Hz, 13.1 Hz, 1H), 1.69 - 1.62 (m, 2H), 1.45 - 1.36 (m, 2H), 0.94 (t,  $J$  = 7.4 Hz, 3H).  $^{13}\text{C}$  NMR (100 MHz,  $\text{CDCl}_3$ , ppm):  $\delta$  = 150.5, 134.1, 132.4, 130.7, 128.9, 127.4, 124.5, 121.2, 118.3, 114.9, 98.3, 68.7, 31.6, 31.2, 19.3, 13.9. HRMS (ESI-TOF): Calcd for  $\text{C}_{16}\text{H}_{17}\text{BrO}_2\text{S}$   $[\text{M}]^+$ : 352.0127; Found: 352.0129.

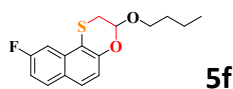

**3-butoxy-9-fluoro-2,3-dihydronaphtho[2,1-b][1,4]oxathiine (3f, yield 35%):** Colorless oil.  $^1\text{H}$  NMR (400 MHz,  $\text{CDCl}_3$ , ppm):  $\delta$  = 7.72 (dd,  $J$  = 5.9 Hz, 8.9 Hz, 1H), 7.56 - 7.51 (m, 2H), 7.17 - 7.12 (m, 1H), 7.03 (d,  $J$  = 8.9 Hz, 1H), 5.47 (dd,  $J$  = 2.1 Hz, 4.5 Hz, 1H), 3.98 - 3.91 (m, 1H), 3.74 - 3.68 (m, 1H), 3.24 - 3.12 (m, 2H), 1.65 - 1.58 (m, 2H), 1.37 - 1.32 (m, 2H), 0.89 (t,  $J$  = 7.4 Hz, 3H).  $^{13}\text{C}$  NMR (100 MHz,  $\text{CDCl}_3$ , ppm):  $\delta$  = 161.3 (d,  $J$  = 245.3 Hz), 148.2, 132.2 (d,  $J$  = 9.5 Hz), 130.6 (d,  $J$  = 9.5 Hz), 126.3, 125.9, 119.2 (d,  $J$  = 2.7 Hz), 114.2 (d,  $J$  = 2.1 Hz), 110.3 (d,  $J$  = 5.5 Hz), 106.9 (d,  $J$  = 23.0 Hz), 94.6, 68.8, 31.6, 28.8, 19.2, 13.8. HRMS (ESI-TOF): Calcd for  $\text{C}_{16}\text{H}_{18}\text{FO}_2\text{S}$   $[\text{M}+\text{H}]^+$ : 293.1006; Found: 293.1004.

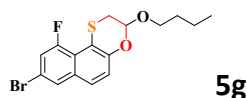

**8-bromo-3-butoxy-10-fluoro-2,3-dihydronaphtho[2,1-b][1,4]oxathiine (5g, yield 28%):** Yellow oil.  $^1\text{H}$  NMR (400 MHz,  $\text{CDCl}_3$ , ppm):  $\delta$  = 7.65 (s, 1H), 7.39 (dd,  $J$  = 1.6 Hz, 8.9 Hz, 1H), 7.22 (dd,  $J$  = 1.9 Hz, 14.6 Hz, 1H), 7.06 (d,  $J$  = 8.9 Hz, 1H), 5.46 - 5.44 (m, 1H), 3.95 - 3.90 (m, 1H), 3.73 - 3.67 (m, 1H), 3.15 (dd,  $J$  = 1.6 Hz, 13.0 Hz, 1H), 3.03 (dd,  $J$  = 4.6 Hz, 12.9 Hz, 1H), 1.65 - 1.58 (m, 2H), 1.39 - 1.30 (m, 2H), 0.89 (t,  $J$  = 7.4 Hz, 3H).  $^{13}\text{C}$  NMR (100 MHz,  $\text{CDCl}_3$ , ppm):  $\delta$  = 159.1 (d,  $J$  = 256.2 Hz), 148.0, 132.7 (d,  $J$  = 5.4 Hz), 126.5 (d,  $J$  = 17.0 Hz), 124.7 (d,  $J$  = 2.9 Hz), 122.1 (d,  $J$  = 1.5 Hz), 120.4 (d,  $J$  = 11.2 Hz), 116.1 (d,  $J$  = 10.2 Hz), 115.3 (d,  $J$  = 26.1 Hz), 110.7 (d,  $J$  = 7.7 Hz), 94.7, 68.8, 31.6, 29.2 (d,  $J$  = 10.1 Hz), 19.2, 13.8. HRMS (ESI-TOF): Calcd for  $\text{C}_{16}\text{H}_{16}\text{BrFO}_2\text{S}$   $[\text{M}]^+$ : 370.0033; Found: 370.0032.

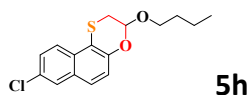

**3-butoxy-8-chloro-2,3-dihydronaphtho[2,1-b][1,4]oxathiine (5h, yield 45%):** Colorless oil;  $^1\text{H}$  NMR (400 MHz,  $\text{CDCl}_3$ , ppm):  $\delta$  = 7.74 (d,  $J$  = 8.9 Hz, 1H), 7.62 (d,  $J$  = 1.6 Hz, 1H), 7.35 - 7.32 (m, 2H), 7.43 (d,  $J$  = 8.9 Hz, 1H), 6.99 (d,  $J$  = 8.9 Hz, 1H), 5.37 - 5.35 (m, 1H), 3.86 - 3.80 (m, 1H), 3.64 - 3.58 (m, 1H), 3.14 - 3.02 (m, 2H), 1.55 - 1.48 (m, 2H), 1.28 - 1.17 (m, 2H), 0.79 (t,  $J$  = 7.4 Hz, 3H).  $^{13}\text{C}$  NMR (100 MHz,  $\text{CDCl}_3$ , ppm):  $\delta$  = 147.4, 130.2, 129.9, 129.4, 127.0, 126.9, 125.0, 124.3, 121.0, , 111.5, 94.5, 94.4, 68.8, 31.5, 28.8, 19.2, 13.8. HRMS (ESI-TOF): Calcd for  $\text{C}_{16}\text{H}_{18}\text{ClO}_2\text{S}$   $[\text{M}+\text{Na}]^+$ : 331.0530;

Found:331.0531.

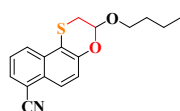

5i

**3-butoxy-2,3-dihydronaphtho[2,1-b][1,4]oxathiine-7-carbonitrile (5i, yield 48%):** Yellow oil.  $^1\text{H}$  NMR (400 MHz,  $\text{CDCl}_3$ , ppm):  $\delta = 7.93 - 7.88$  (m, 2H), 7.56 (d,  $J = 8.9$  Hz, 1H), 7.35 (t,  $J = 2.0$  Hz, 1H), 7.14 (d,  $J = 8.9$  Hz, 1H), 5.51 (dd,  $J = 2.4$  Hz, 5.3 Hz, 1H), 4.00 - 3.94 (m, 1H), 3.74 - 3.68 (m, 1H), 3.18 - 2.99 (m, 2H), 1.66 - 1.59 (m, 2H), 1.41 - 1.32 (m, 2H), 0.90 (t,  $J = 7.4$  Hz, 3H).  $^{13}\text{C}$  NMR (100 MHz,  $\text{CDCl}_3$ , ppm):  $\delta = 150.5$ , 137.4, 134.2, 130.3, 130.2, 127.5, 123.1, 121.6, 120.9, 112.5, 107.0, 96.3, 68.9, 31.6, 29.7, 19.2, 13.8. HRMS (ESI-TOF): Calcd for  $\text{C}_{17}\text{H}_{17}\text{NO}_2\text{S}$   $[\text{M}]^+$ : 299.0975; Found: 299.0985.

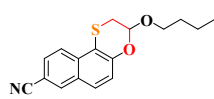

5j

**3-butoxy-2,3-dihydronaphtho[2,1-b][1,4]oxathiine-8-carbonitrile (5j, yield 47%):** Yellow oil.  $^1\text{H}$  NMR (400 MHz,  $\text{CDCl}_3$ , ppm):  $\delta = 8.05$  (d,  $J = 1.0$  Hz, 1H), 7.90 (d,  $J = 8.7$  Hz, 1H), 7.57 - 7.52 (m, 2H), 7.14 (d,  $J = 8.9$  Hz, 1H), 5.48 (dd,  $J = 2.0$  Hz, 4.3 Hz, 1H), 3.95 - 3.89 (m, 1H), 3.74 - 3.68 (m, 1H), 3.24 - 3.11 (m, 2H), 1.62 - 1.57 (m, 2H), 1.36 - 1.24 (m, 2H), 0.86 (t,  $J = 7.4$  Hz, 3H).  $^{13}\text{C}$  NMR (100 MHz,  $\text{CDCl}_3$ , ppm):  $\delta = 149.7$ , 134.0, 132.7, 128.4, 126.9, 126.3, 123.9, 121.7, 119.3, 112.0, 107.4, 94.6, 68.9, 31.9, 28.6, 19.1, 13.8. HRMS (ESI-TOF): Calcd for  $\text{C}_{17}\text{H}_{18}\text{NO}_2\text{S}$   $[\text{M}+\text{H}]^+$ : 300.1058; Found: 300.1054.

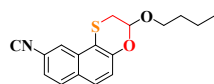

5k

**3-butoxy-9-isocyano-2,3-dihydronaphtho[2,1-b][1,4]oxathiine (5k, yield 38%):** Yellow oil.  $^1\text{H}$  NMR (400 MHz,  $\text{CDCl}_3$ , ppm):  $\delta = 8.26$  (s, 1H), 7.79 (d,  $J = 8.4$  Hz, 1H), 7.54 (d,  $J = 8.9$  Hz, 1H), 7.48 (dd,  $J = 1.2$  Hz, 8.4 Hz, 1H), 7.19 (d,  $J = 8.8$  Hz, 1H), 5.49 (dd,  $J = 2.1$  Hz, 4.2 Hz, 1H), 3.97 - 3.89 (m, 1H), 3.74 - 3.68 (m, 1H), 3.25 - 3.13 (m, 2H), 1.63 - 1.56 (m, 2H), 1.37 - 1.25 (m, 2H), 0.87 (t,  $J = 7.4$  Hz, 3H).  $^{13}\text{C}$  NMR (100 MHz,  $\text{CDCl}_3$ , ppm):  $\delta = 148.5$ , 131.0, 130.3, 129.4, 128.6, 125.9, 124.8, 123.0, 119.4, 112.3, 109.6, 94.4, 68.9, 31.5, 28.7, 19.2, 13.8. HRMS (ESI-TOF): Calcd for  $\text{C}_{17}\text{H}_{18}\text{NO}_2\text{S}$   $[\text{M}+\text{H}]^+$ : 300.1053; Found: 300.1053.

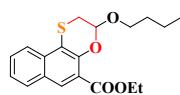

5l

**ethyl 3-butoxy-2,3-dihydronaphtho[2,1-b][1,4]oxathiine-5-carboxylate (5l, yield 35%):** Colorless oil;  $^1\text{H}$  NMR (400 MHz,  $\text{CDCl}_3$ , ppm):  $\delta = 7.90$  (s, 1H), 7.81 (d,  $J = 8.5$  Hz, 1H), 7.68 (d,  $J = 8.1$  Hz, 1H), 7.46 - 7.42 (m, 1H), 7.32 - 7.28 (m, 1H), 5.42 (dd,  $J = 2.2$  Hz, 4.5 Hz, 1H), 4.35 - 4.29 (m, 2H), 3.95 - 3.89 (m, 1H), 3.65 - 3.59 (m, 1H), 3.20 -



3.04 (m, 2H), 1.53 - 1.46 (m, 2H), 1.32 (t,  $J = 7.1$  Hz, 3H), 1.26 - 1.18 (m, 2H), 0.76 (t,  $J = 7.4$  Hz, 3H).  $^{13}\text{C}$  NMR (100 MHz,  $\text{CDCl}_3$ , ppm):  $\delta = 166.2, 144.8, 132.1, 129.2, 128.7, 128.0, 127.8, 124.9, 123.3, 122.5, 113.2, 94.3$  (d,  $J = 4.3$  Hz), 68.7, 61.2, 31.5, 28.6, 19.2, 14.3, 13.8. HRMS (ESI-TOF): Calcd for  $\text{C}_{19}\text{H}_{22}\text{NaO}_4\text{S}$   $[\text{M}+\text{Na}]^+$ : 369.1131; Found: 369.1130.

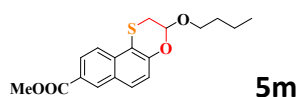

**methyl 3-butoxy-2,3-dihydronaphtho[2,1-b][1,4]oxathiine-8-carboxylate (5m, yield 42%)**: Colorless oil;  $^1\text{H}$  NMR (400 MHz,  $\text{CDCl}_3$ , ppm):  $\delta = 8.48$  (d,  $J = 1.6$  Hz, 1H), 8.06 (dd,  $J = 1.7$  Hz, 8.8 Hz, 1H), 7.91 (d,  $J = 8.8$  Hz, 1H), 7.63 (d,  $J = 8.8$  Hz, 1H), 7.11 (d,  $J = 8.9$  Hz, 1H), 5.48 (dd,  $J = 2.1$  Hz, 4.5 Hz, 1H), 3.96 (s, 3H), 3.95 - 3.91 (m, 1H), 3.73 - 3.68 (m, 1H), 3.24 - 3.11 (m, 2H), 1.64 - 1.57 (m, 2H), 1.37 - 1.28 (m, 2H), 0.88 (t,  $J = 7.4$  Hz, 3H).  $^{13}\text{C}$  NMR (100 MHz,  $\text{CDCl}_3$ , ppm):  $\delta = 167.2, 149.2, 133.4, 131.2, 128.5, 127.3, 125.8, 125.7, 122.9, 120.7, 111.4, 94.7, 68.8, 52.1, 31.5, 28.7, 19.1, 13.8$ . HRMS (ESI-TOF): Calcd for  $\text{C}_{18}\text{H}_{21}\text{O}_4\text{S}$   $[\text{M}+\text{H}]^+$ : 333.1155; Found: 333.1155.

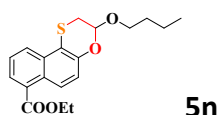

**ethyl 3-butoxy-2,3-dihydronaphtho[2,1-b][1,4]oxathiine-7-carboxylate (5n, yield 52%)**: Colorless oil;  $^1\text{H}$  NMR (400 MHz,  $\text{CDCl}_3$ , ppm):  $\delta = 8.00$  (s, 1H), 7.91 (d,  $J = 8.5$  Hz, 1H), 7.79 (d,  $J = 8.1$  Hz, 1H), 7.57 - 7.53 (m, 1H), 7.43 - 7.39 (m, 1H), 5.53 (dd,  $J = 2.2$  Hz, 4.5 Hz, 1H), 4.44 - 4.39 (m, 2H), 4.05 - 3.99 (m, 1H), 3.75 - 3.70 (m, 1H), 3.31 (m, 2H), 1.61 - 1.55 (m, 2H), 1.42 (t,  $J = 7.1$  Hz, 3H), 1.36 - 1.25 (m, 2H), 0.86 (t,  $J = 7.4$  Hz, 3H).  $^{13}\text{C}$  NMR (100 MHz,  $\text{CDCl}_3$ , ppm):  $\delta = 166.2, 144.7, 132.1, 129.2, 128.4, 128.0, 127.8, 124.9, 123.3, 122.5, 113.2, 94.3, 68.7, 61.2, 31.4, 28.6, 19.2, 14.4, 13.8$ . HRMS (ESI-TOF): Calcd for  $\text{C}_{19}\text{H}_{22}\text{NaO}_4\text{S}$   $[\text{M}+\text{Na}]^+$ : 369.1131; Found: 369.1124.

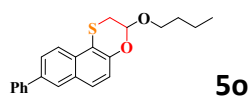

**3-butoxy-8-phenyl-2,3-dihydronaphtho[2,1-b][1,4]oxathiine (5o, yield 55%)**: Colorless oil;  $^1\text{H}$  NMR (400 MHz,  $\text{CDCl}_3$ , ppm):  $\delta = 8.00$  (d,  $J = 8.7$  Hz, 2H), 7.98 (d,  $J = 1.7$  Hz, 1H), 7.79 (dd,  $J = 1.9$  Hz, 8.7 Hz, 1H), 7.74 - 7.71 (m, 2H), 7.62 (d,  $J = 8.8$  Hz, 1H), 7.52 - 7.48 (m, 2H), 7.41 - 7.38 (m, 1H), 7.12 (d,  $J = 8.8$  Hz, 1H), 5.49 (dd,  $J = 2.1$  Hz, 4.6 Hz, 1H), 4.00 - 3.95 (m, 1H), 3.76 - 3.71 (m, 1H), 3.28 - 3.15 (m, 2H), 1.68 - 1.61 (m, 2H), 1.40 - 1.30 (m, 2H), 0.92 (t,  $J = 7.4$  Hz, 3H).  $^{13}\text{C}$  NMR (100 MHz,  $\text{CDCl}_3$ , ppm):  $\delta = 147.4, 140.9, 136.9, 130.3, 129.8, 128.9, 127.3, 126.3, 126.2, 125.9, 123.3, 120.3, 111.1, 94.7, 68.7, 31.6, 28.9, 19.2, 13.8$ . HRMS (ESI-TOF): Calcd for  $\text{C}_{22}\text{H}_{22}\text{NaO}_2\text{S}$   $[\text{M}+\text{Na}]^+$ : 373.1233; Found: 373.1231.

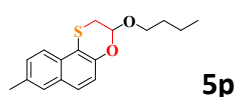

**3-butoxy-8-methyl-2,3-dihydronaphtho[2,1-b][1,4]oxathiine (5p, yield 46%):** Colorless oil;  $^1\text{H}$  NMR (400 MHz,  $\text{CDCl}_3$ , ppm):  $\delta$  = 7.82 (d,  $J$  = 8.6 Hz, 1H), 7.53 (s, 1H), 7.47 (d,  $J$  = 8.8 Hz, 1H), 7.34 (dd,  $J$  = 1.6 Hz, 8.6 Hz, 1H), 7.05 (d,  $J$  = 8.8 Hz, 1H), 5.45 (dd,  $J$  = 2.1 Hz, 4.6 Hz, 1H), 3.97 - 3.92 (m, 1H), 3.74 - 3.68 (m, 1H), 3.25 - 3.12 (m, 2H), 2.49 (s, 3H), 1.66 - 1.57 (m, 2H), 1.40 - 1.29 (m, 2H), 0.90 (t,  $J$  = 7.4 Hz, 3H).  $^{13}\text{C}$  NMR (100 MHz,  $\text{CDCl}_3$ , ppm):  $\delta$  = 146.7, 133.7, 129.7, 129.2, 128.5, 127.4, 125.4, 122.5, 119.8, 110.9, 94.6, 68.7, 31.6, 18.9, 21.4, 19.2, 13.8. HRMS (ESI-TOF): Calcd for  $\text{C}_{17}\text{H}_{20}\text{NaO}_2\text{S}$  [ $\text{M}+\text{Na}$ ] $^+$ : 311.1076; Found: 311.1075.

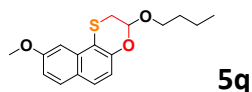

**3-butoxy-2,3-dihydro-8-methoxynaphtho[2,1-b][1,4]oxathiine (5q, yield 26%):** Colorless oil;  $^1\text{H}$  NMR (400 MHz,  $\text{CDCl}_3$ , ppm):  $\delta$  = 7.53 (d,  $J$  = 8.9 Hz, 1H), 7.36 (d,  $J$  = 8.8 Hz, 1H), 7.06 (d,  $J$  = 2.3 Hz, 1H), 6.93 (dd,  $J$  = 2.3 Hz, 8.9 Hz, 1H), 6.83 (d,  $J$  = 8.7 Hz, 1H), 5.33 (dd,  $J$  = 2.1 Hz, 4.6 Hz, 1H), 3.86 - 3.79 (m, 4H), 3.61 - 3.56 (m, 1H), 3.12 (dd,  $J$  = 2.2 Hz, 12.8 Hz, 1H), 3.03 (dd,  $J$  = 4.6 Hz, 12.8 Hz, 1H), 1.54 - 1.47 (m, 2H), 1.26 - 1.20 (m, 2H), 1.16 (s, 1H), 0.78 (t,  $J$  = 7.4 Hz, 3H).  $^{13}\text{C}$  NMR (100 MHz,  $\text{CDCl}_3$ , ppm):  $\delta$  = 158.4, 148.0, 132.3, 129.8, 125.8, 124.6, 117.4, 116.5, 109.7, 101.8, 94.6 (d,  $J$  = 5.1 Hz), 68.7, 55.4, 55.3, 31.6, 28.9, 19.2, 13.8. HRMS (ESI-TOF): Calcd for  $\text{C}_{17}\text{H}_{21}\text{O}_3\text{S}$  [ $\text{M}+\text{H}$ ] $^+$ : 305.1206; Found: 305.1210.

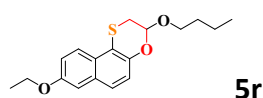

**3-butoxy-8-ethoxy-2,3-dihydronaphtho[2,1-b][1,4]oxathiine (5r, yield 45%):** Yellow oil.  $^1\text{H}$  NMR (400 MHz,  $\text{CDCl}_3$ , ppm):  $\delta$  = 7.64 (d,  $J$  = 8.9 Hz, 1H), 7.47 (d,  $J$  = 8.8 Hz, 1H), 7.2 (d,  $J$  = 2.0 Hz, 1H), 7.04 (dd,  $J$  = 2.3 Hz, 8.9 Hz, 1H), 6.94 (d,  $J$  = 8.8 Hz, 1H), 5.47 (dd,  $J$  = 2.0 Hz, 4.5 Hz, 1H), 4.20 - 4.14 (m, 2H), 3.97 - 3.92 (m, 1H), 3.73 - 3.68 (m, 1H), 3.25 - 3.12 (m, 2H), 1.66 - 1.58 (m, 2H), 1.49 (t,  $J$  = 7.0 Hz, 3H), 1.39 - 1.30 (m, 2H), 0.89 (t,  $J$  = 7.4 Hz, 3H).  $^{13}\text{C}$  NMR (100 MHz,  $\text{CDCl}_3$ , ppm):  $\delta$  = 157.7, 147.9, 132.3, 129.8, 125.8, 124.5, 117.3, 116.7, 109.5, 102.6, 94.6, 68.7, 63.5, 31.6, 28.9, 19.2, 14.8, 13.8. HRMS (ESI-TOF): Calcd for  $\text{C}_{18}\text{H}_{23}\text{O}_3\text{S}$  [ $\text{M}+\text{H}$ ] $^+$ : 319.1362; Found: 319.1356.

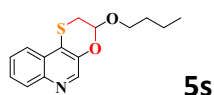

**3-butoxy-2,3-dihydro-[1,4]oxathiino[3,2-f]quinoline (5s, yield 43%):** Brown oil.  $^1\text{H}$  NMR (400 MHz,  $\text{CDCl}_3$ , ppm):  $\delta$  = 8.40 (s, 1H), 7.95 (d,  $J$  = 8.2 Hz, 1H), 7.75 (dd,  $J$  = 0.7 Hz, 8.1 Hz, 1H), 7.53 - 7.42 (m, 2H), 5.40 (dd,  $J$  = 2.0 Hz, 3.7 Hz, 1H), 3.85 - 3.79 (m, 1H), 3.65 - 3.59 (m, 1H), 3.19 - 3.06 (m, 2H), 1.53 - 1.46 (m, 2H), 1.27 - 1.17 (m, 2H), 0.78 (t,  $J$  = 7.4 Hz, 3H).  $^{13}\text{C}$  NMR (100 MHz,  $\text{CDCl}_3$ , ppm):  $\delta$  = 143.4, 143.2, 142.6, 129.7, 127.3, 126.6, 125.7, 122.5, 122.4, 93.1, 68.8, 31.4, 28.7, 19.1, 13.7. HRMS (ESI-TOF): Calcd for  $\text{C}_{15}\text{H}_{18}\text{NO}_2\text{S}$  [ $\text{M}+\text{H}$ ] $^+$ : 276.1053; Found: 276.1059.

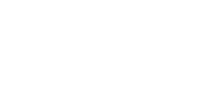

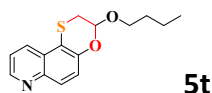

**3-butoxy-2,3-dihydro-[1,4]oxathiino[3,2-f]quinoline (5t, yield 33%):** Brown oil.  $^1\text{H}$  NMR (400 MHz,  $\text{CDCl}_3$ , ppm):  $\delta = 8.74$  (dd,  $J = 1.3$  Hz, 4.2 Hz, 1H), 8.18 (d,  $J = 8.5$  Hz, 1H), 7.75 (d,  $J = 9.1$  Hz, 1H), 7.32 (dd,  $J = 2.8$  Hz, 4.2 Hz, 1H), 7.24 (d,  $J = 9.1$  Hz, 1H), 5.43 (dd,  $J = 2.0$  Hz, 4.2 Hz, 1H), 3.91 - 3.85 (m, 1H), 3.69 - 3.63 (m, 1H), 3.19 - 3.07 (m, 2H), 1.59 - 1.51 (m, 2H), 1.32 - 1.21 (m, 2H), 0.82 (t,  $J = 7.4$  Hz, 3H).  $^{13}\text{C}$  NMR (100 MHz,  $\text{CDCl}_3$ , ppm):  $\delta = 148.2, 147.2, 144.6, 130.9, 127.2, 126.2, 123.4, 120.8, 110.9, 94.3, 68.7, 31.5, 28.5, 19.1, 13.8$ . HRMS (ESI-TOF): Calcd for  $\text{C}_{15}\text{H}_{18}\text{NO}_2\text{S}$   $[\text{M}+\text{H}]^+$ : 276.1053; Found: 276.1056.

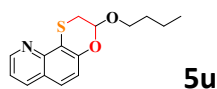

**3-butoxy-2,3-dihydro-[1,4]oxathiino[2,3-h]quinoline (5u, yield 29%):** Brown oil.  $^1\text{H}$  NMR (400 MHz,  $\text{CDCl}_3$ , ppm):  $\delta = 8.82$  (dd,  $J = 1.6$  Hz, 4.3 Hz, 1H), 7.98 (dd,  $J = 1.6$  Hz, 8.2 Hz, 1H), 7.42 (d,  $J = 8.8$  Hz, 1H), 7.24 (dd,  $J = 4.3$  Hz, 8.2 Hz, 1H), 7.08 (d,  $J = 8.9$  Hz, 1H), 5.42 (dd,  $J = 2.0$  Hz, 4.6 Hz, 1H), 3.92 - 3.86 (m, 1H), 3.69 - 3.63 (m, 1H), 3.20 - 3.09 (m, 2H), 1.59 - 1.52 (m, 2H), 1.33 - 1.24 (m, 2H), 0.83 (t,  $J = 7.4$  Hz, 3H).  $^{13}\text{C}$  NMR (100 MHz,  $\text{CDCl}_3$ , ppm):  $\delta = 149.9, 149.4, 145.7, 135.9, 124.3, 124.0, 120.6, 119.6, 114.8, 94.9, 68.8, 31.5, 28.6, 19.1, 13.8$ . HRMS (ESI-TOF): Calcd for  $\text{C}_{15}\text{H}_{18}\text{NO}_2\text{S}$   $[\text{M}+\text{H}]^+$ : 276.1053; Found: 276.1062.

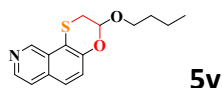

**3-butoxy-2,3-dihydro-[1,4]oxathiino[2,3-h]isoquinoline (5v, yield 36%):** Brown oil.  $^1\text{H}$  NMR (400 MHz,  $\text{CDCl}_3$ , ppm):  $\delta = 9.01$  (s, 1H), 8.43 (d,  $J = 5.9$  Hz, 1H), 7.60 - 7.55 (m, 2H), 7.08 (d,  $J = 8.8$  Hz, 1H), 5.42 (dd,  $J = 2.0$  Hz, 4.2 Hz, 1H), 3.89 - 3.83 (m, 1H), 3.67 - 3.62 (m, 1H), 3.17 - 3.05 (m, 2H), 1.57 - 1.50 (m, 2H), 1.30 - 1.19 (m, 2H), 0.80 (t,  $J = 7.4$  Hz, 3H).  $^{13}\text{C}$  NMR (100 MHz,  $\text{CDCl}_3$ , ppm):  $\delta = 151.9, 150.3, 143.3, 134.3, 125.5, 124.7, 121.3, 115.9, 110.4, 94.6, 68.9, 31.4, 28.3, 19.1, 13.7$ . HRMS (ESI-TOF): Calcd for  $\text{C}_{15}\text{H}_{18}\text{NO}_2\text{S}$   $[\text{M}+\text{H}]^+$ : 276.1053; Found: 276.1060.

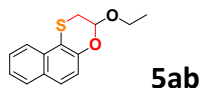

**3-ethoxy-2,3-dihydronaphtho[2,1-b][1,4]oxathiine <sup>3-5</sup> (5ab, yield 57%):** Colorless oil;  $^1\text{H}$  NMR (400 MHz,  $\text{CDCl}_3$ , ppm):  $\delta = 7.81$  (d,  $J = 8.4$  Hz, 1H), 7.64 (d,  $J = 8.1$  Hz, 1H), 7.45 - 7.38 (m, 2H), 7.30 - 7.26 (m, 1H), 6.97 (d,  $J = 8.9$  Hz, 1H), 5.36 (dd,  $J = 2.1$  Hz, 4.7 Hz, 1H), 3.93 - 3.85 (m, 1H), 3.70 - 3.63 (m, 1H), 3.12 (dd,  $J = 2.2$  Hz, 12.9 Hz, 1H), 3.03 (dd,  $J = 4.7$  Hz, 12.9 Hz, 1H), 1.16 (t,  $J = 7.1$  Hz, 3H).  $^{13}\text{C}$  NMR (100 MHz,  $\text{CDCl}_3$ , ppm):  $\delta = 147.3, 131.1, 129.5, 128.3, 126.4, 126.1, 124.2, 122.7, 119.9, 111.0, 94.4$  (d,  $J = 4.3$  Hz), 64.5, 28.9, 12.2. HRMS (ESI-TOF): Calcd for  $\text{C}_{14}\text{H}_{14}\text{NaO}_2\text{S}$   $[\text{M}+\text{Na}]^+$ :

269.0607; Found: 269.0607.

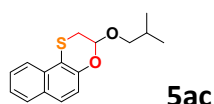

**3-isobutoxy-2,3-dihydronaphtho[2,1-b][1,4]oxathiine (5ac, yield 52%):** Colorless oil;  $^1\text{H}$  NMR (400 MHz,  $\text{CDCl}_3$ , ppm):  $\delta = 8.02$  (d,  $J = 8.4$  Hz, 1H), 7.77 (d,  $J = 8.0$  Hz, 1H), 7.61 - 7.55 (m, 2H), 7.44 (t,  $J = 7.4$  Hz, 1H), 7.16 (d,  $J = 8.8$  Hz, 1H), 5.47 (dd,  $J = 1.9$  Hz, 6.4 Hz, 1H), 3.78 (dd,  $J = 6.8$  Hz, 12.3 Hz, 1H), 3.50 (dd,  $J = 9.3$  Hz, 6.4 Hz, 1H), 3.28 - 3.17 (m, 2H), 2.03 - 1.94 (m, 1H), 0.97 (d,  $J = 6.6$  Hz, 3H), 0.93 (d,  $J = 6.7$  Hz, 3H).  $^{13}\text{C}$  NMR (100 MHz,  $\text{CDCl}_3$ , ppm):  $\delta = 147.4$ , 131.1, 129.5, 128.4, 126.4, 126.0, 124.3, 122.8, 120.0, 111.2, 94.8, 75.5, 28.9, 28.5, 19.4, 19.3. HRMS (ESI-TOF): Calcd for  $\text{C}_{16}\text{H}_{19}\text{O}_2\text{S}$   $[\text{M}+\text{H}]^+$ : 275.1100; Found: 275.1100.

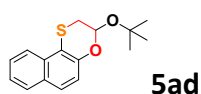

**3-(tert-butoxy)-2,3-dihydronaphtho[2,1-b][1,4]oxathiine (5ad, yield 39%):** Colorless oil.  $^1\text{H}$  NMR (400 MHz,  $\text{CDCl}_3$ , ppm):  $\delta = 7.94$  (d,  $J = 8.4$  Hz, 1H), 7.77 (d,  $J = 8.1$  Hz, 1H), 7.57 - 7.51 (m, 2H), 7.40 (t,  $J = 7.6$  Hz, 1H), 7.06 (d,  $J = 8.8$  Hz, 1H), 5.69 (dd,  $J = 2.5$  Hz, 5.0 Hz, 1H), 3.20 - 3.11 (m, 2H), 1.39 (s, 9H).  $^{13}\text{C}$  NMR (100 MHz,  $\text{CDCl}_3$ , ppm):  $\delta = 148.2$ , 131.1, 129.4, 128.3, 126.3, 125.9, 124.1, 122.7, 120.2, 110.6, 90.5, 76.4, 30.1, 28.8. HRMS (ESI-TOF): Calcd for  $\text{C}_{16}\text{H}_{19}\text{O}_2\text{S}$   $[\text{M}+\text{H}]^+$ : 275.1100; Found: 275.1094.

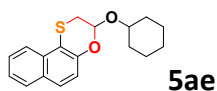

**3-(cyclohexyloxy)-2,3-dihydronaphtho[2,1-b][1,4]oxathiine (5ae, yield 33%):** Colorless oil.  $^1\text{H}$  NMR (400 MHz,  $\text{CDCl}_3$ , ppm):  $\delta = 7.93$  (d,  $J = 8.4$  Hz, 1H), 7.76 (d,  $J = 8.1$  Hz, 1H), 7.57 - 7.50 (m, 2H), 7.40 (t,  $J = 7.4$  Hz, 1H), 7.08 (d,  $J = 8.8$  Hz, 1H), 5.60 (dd,  $J = 2.0$  Hz, 4.8 Hz, 1H), 3.92 - 3.80 (m, 1H), 3.25 - 3.13 (m, 2H), 2.0 (dd,  $J = 2.7$  Hz, 9.8 Hz, 1H), 1.91 (dd,  $J = 3.8$  Hz, 11.1 Hz, 1H), 1.81 - 1.72 (m, 2H), 1.57 - 1.54 (m, 1H), 1.48 - 1.16 (m, 5H).  $^{13}\text{C}$  NMR (100 MHz,  $\text{CDCl}_3$ , ppm):  $\delta = 147.6$ , 131.1, 129.4, 128.3, 126.3, 126.0, 124.2, 122.7, 120.0, 110.9, 93.2, 33.5, 32.1, 29.3, 25.6, 24.3, 24.2. HRMS (ESI-TOF): Calcd for  $\text{C}_{18}\text{H}_{21}\text{O}_2\text{S}$   $[\text{M}+\text{H}]^+$ : 301.1257; Found: 301.1258.

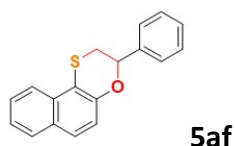

**3-phenyl-2,3-dihydronaphtho[2,1-b][1,4]oxathiine (5af, yield 12%):** Colorless oil;  $^1\text{H}$  NMR (400 MHz,  $\text{CDCl}_3$ , ppm):  $\delta = 7.90$  (d,  $J = 8.0$  Hz, 1H), 7.76 (d,  $J = 8.8$  Hz, 1H), 7.55 - 7.36 (m, 8H), 7.14 (d,  $J = 8.9$  Hz, 1H), 5.30 (dd,  $J = 2.3$  Hz, 8.9 Hz, 1H), 3.36 - 3.25 (m, 2H).  $^{13}\text{C}$  NMR (100 MHz,  $\text{CDCl}_3$ , ppm):  $\delta = 150.0$ , 140.3, 131.2, 129.4, 128.7, 128.5,

128.3, 126.4, 126.0, 125.9, 124.2, 122.6, 120.0, 110.3, 31.5, 29.7. HRMS (ESI-TOF): Calcd for C<sub>18</sub>H<sub>15</sub>OS [M+H]<sup>+</sup>: 279.0838; Found: 279.0843.

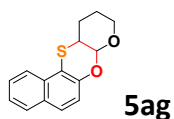

**7a,10,11,11a-tetrahydro-9H-naphtho[2,1-b]pyrano[3,2-e][1,4]oxathiine<sup>6</sup> (5ag**, yield 15%): Colorless oil; <sup>1</sup>H NMR (400 MHz, CDCl<sub>3</sub>, ppm): δ = 7.77 (d, *J* = 8.4 Hz, 1H), 7.66 (d, *J* = 8.0 Hz, 1H), 7.47 (d, *J* = 8.8 Hz, 1H), 7.43 - 7.38 (m, 1H), 7.31 - 7.27 (m, 1H), 7.04 (d, *J* = 8.9 Hz, 1H), 5.57 (d, *J* = 2.2 Hz, 1H), 4.04 - 3.97 (m, 1H), 3.70 - 3.66 (m, 1H), 3.29 - 3.25 (m, 1H), 1.94 - 1.66 (m, 4H). HRMS (ESI-TOF): Calcd for C<sub>15</sub>H<sub>15</sub>O<sub>2</sub>S [M+H]<sup>+</sup>: 259.0793; Found: 259.0788.

## 2.3 <sup>1</sup>H NMR and <sup>13</sup>C NMR spectra

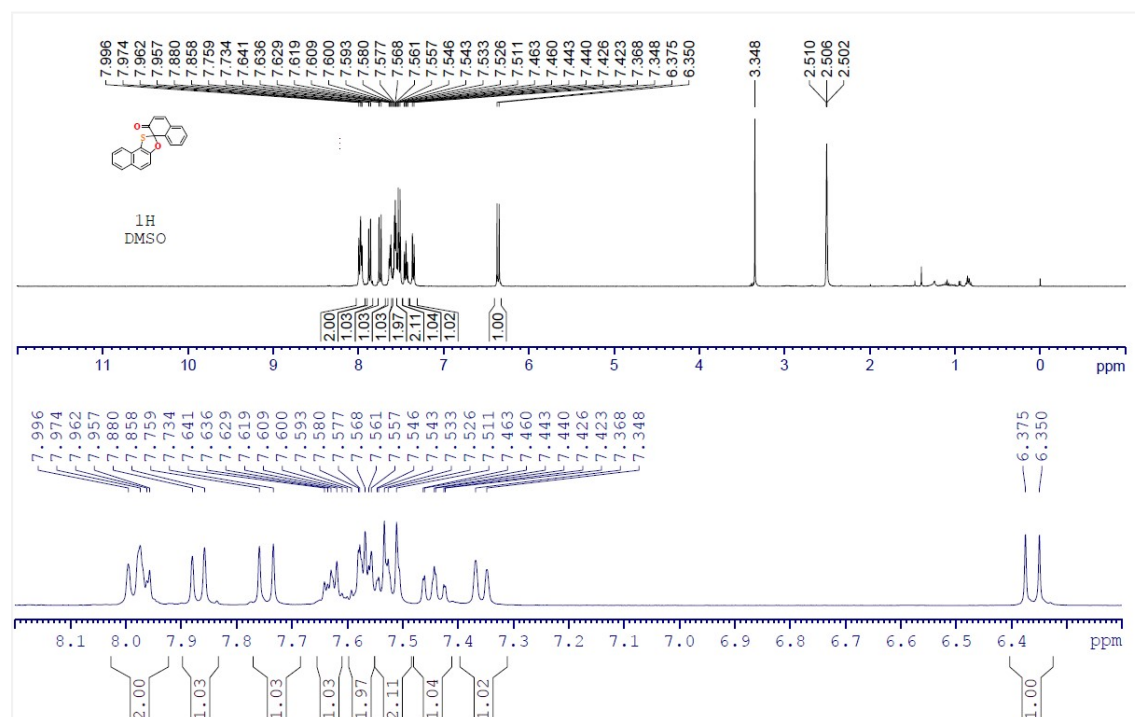

**Figure S1.** <sup>1</sup>H NMR (400 MHz, DMSO-d<sub>6</sub>) Spectrum of Compound 3a

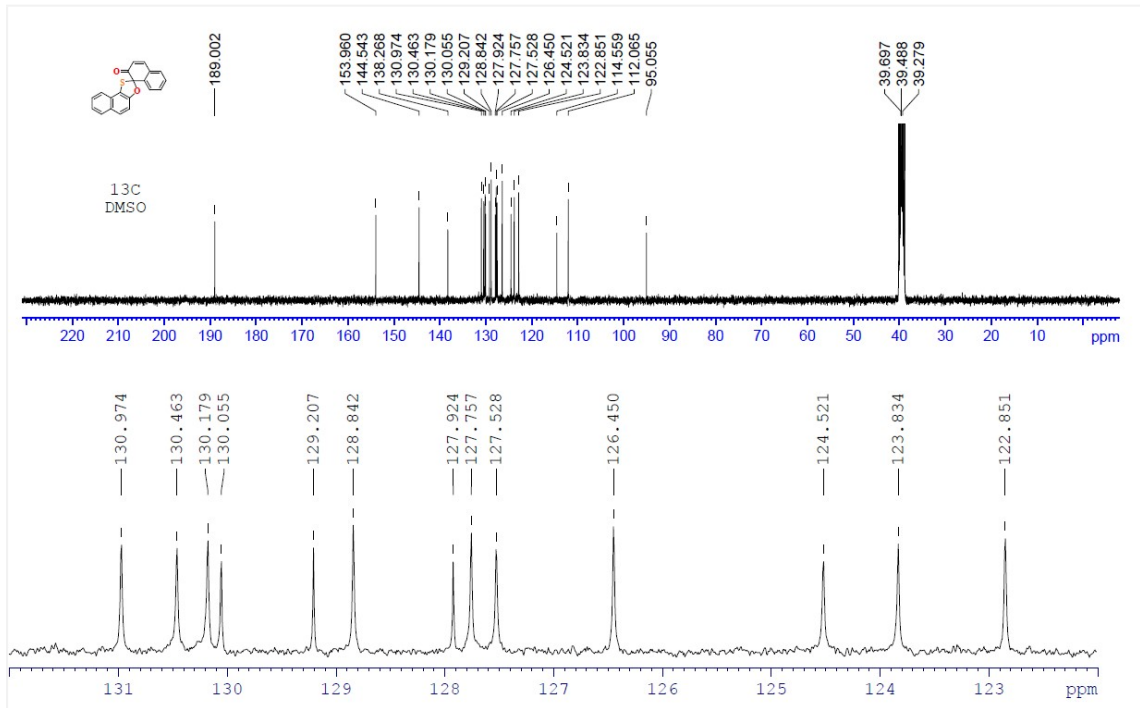

Figure S2.  $^{13}\text{C}$  NMR (100 MHz,  $\text{DMSO-d}_6$ ) Spectrum of Compound 3a

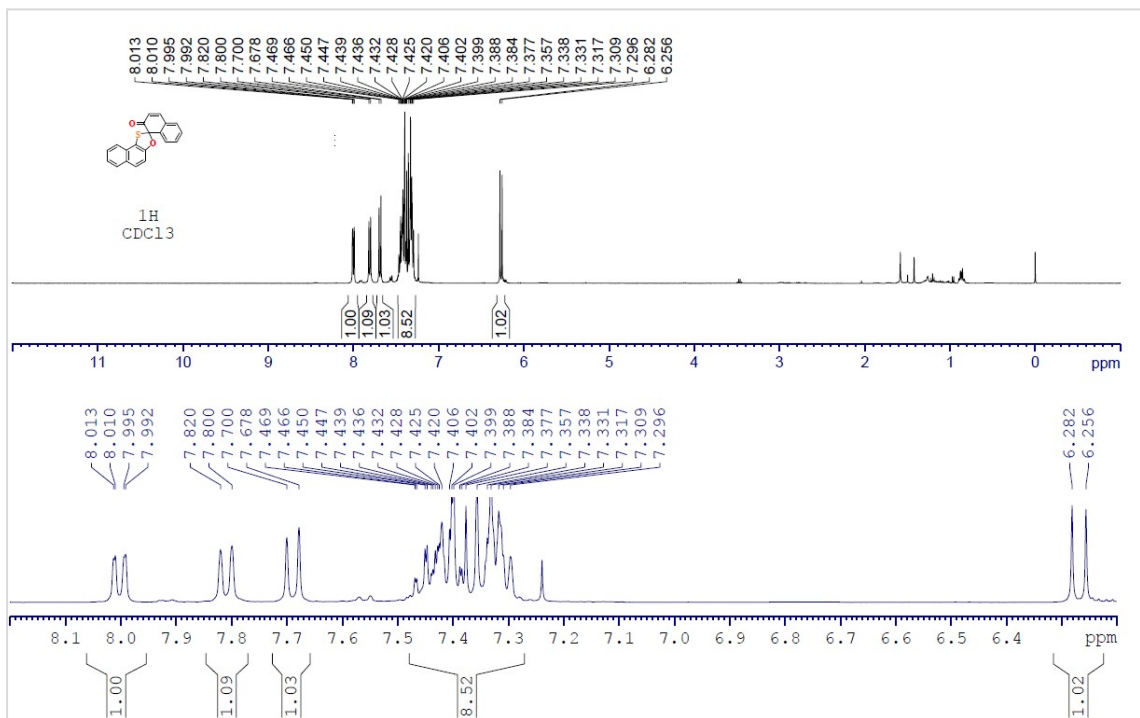

Figure S3.  $^1\text{H}$  NMR (400 MHz,  $\text{CDCl}_3$ ) Spectrum of Compound 3a

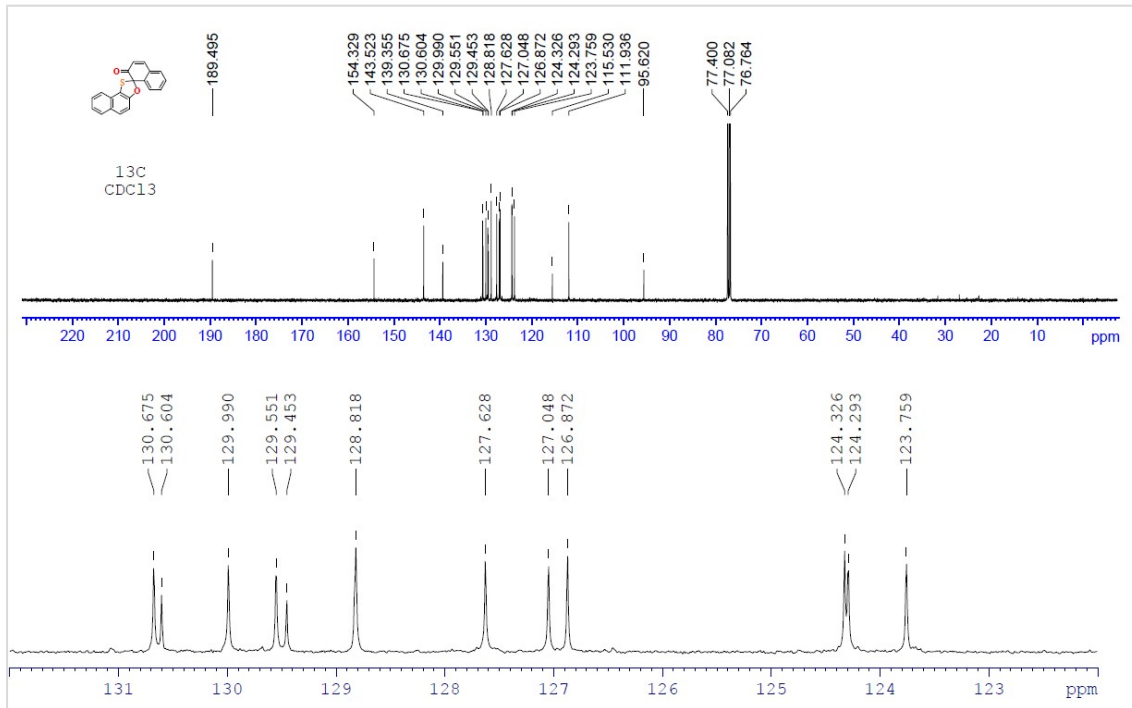

**Figure S4.** <sup>13</sup>C NMR (100 MHz, CDCl<sub>3</sub>) Spectrum of Compound 3a

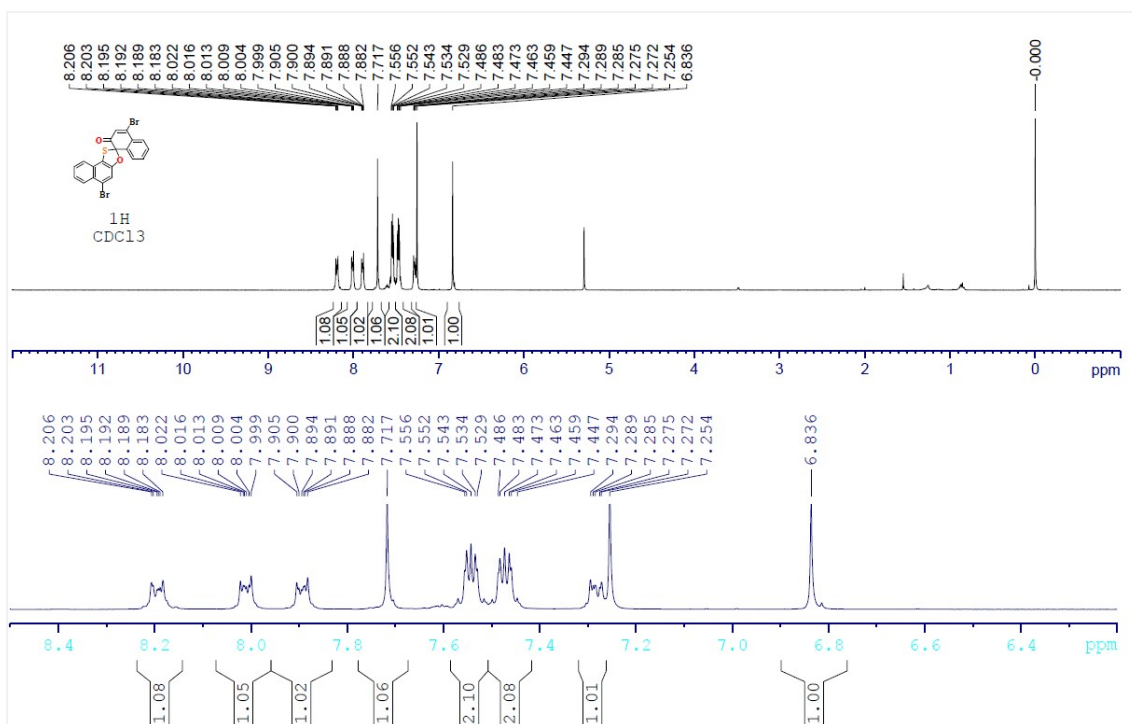

**Figure S5.** <sup>1</sup>H NMR (400 MHz, CDCl<sub>3</sub>) Spectrum of Compound 3b

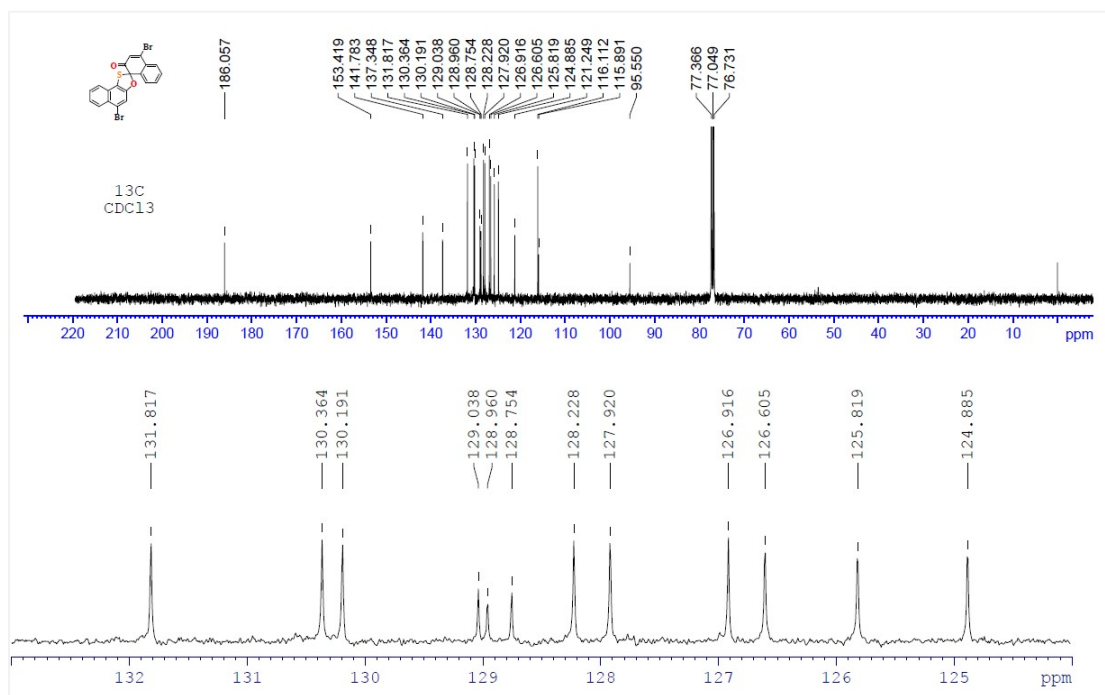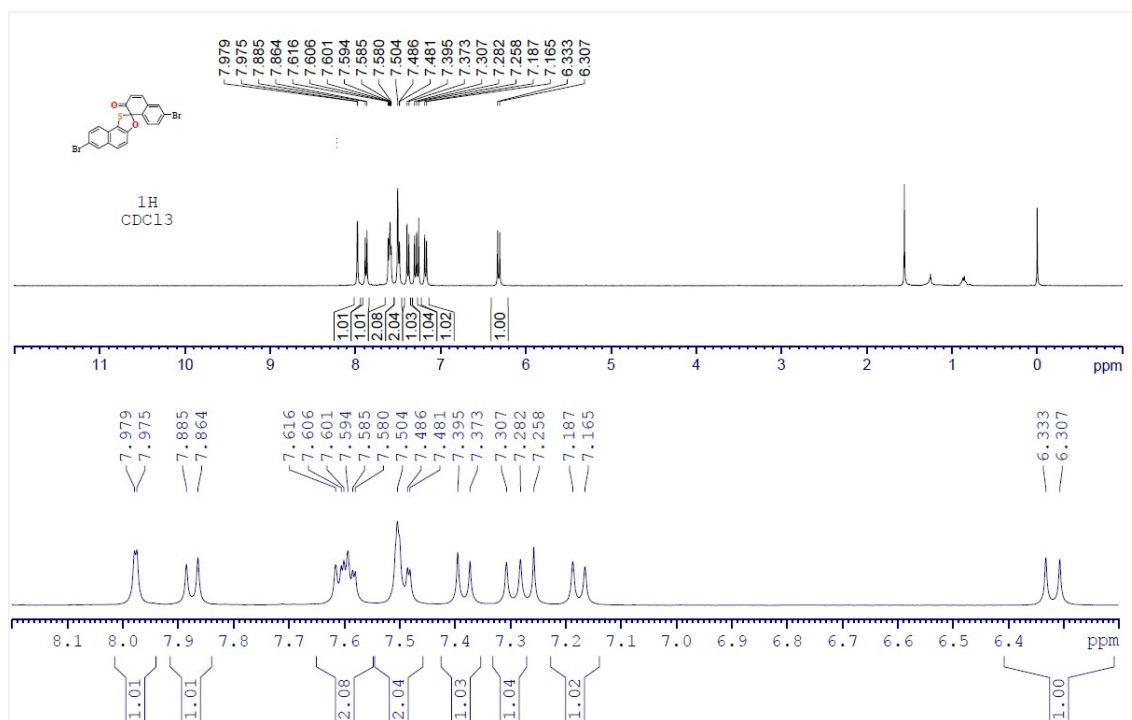



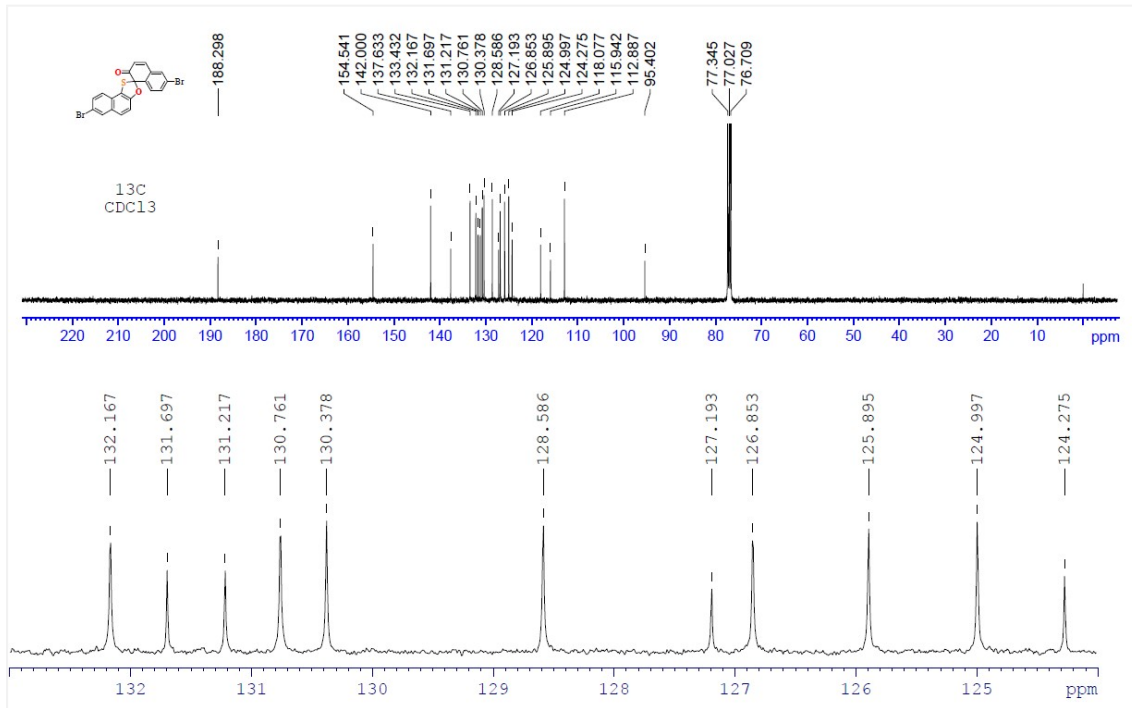

Figure S8. <sup>13</sup>C NMR (100 MHz, CDCl<sub>3</sub>) Spectrum of Compound 3c

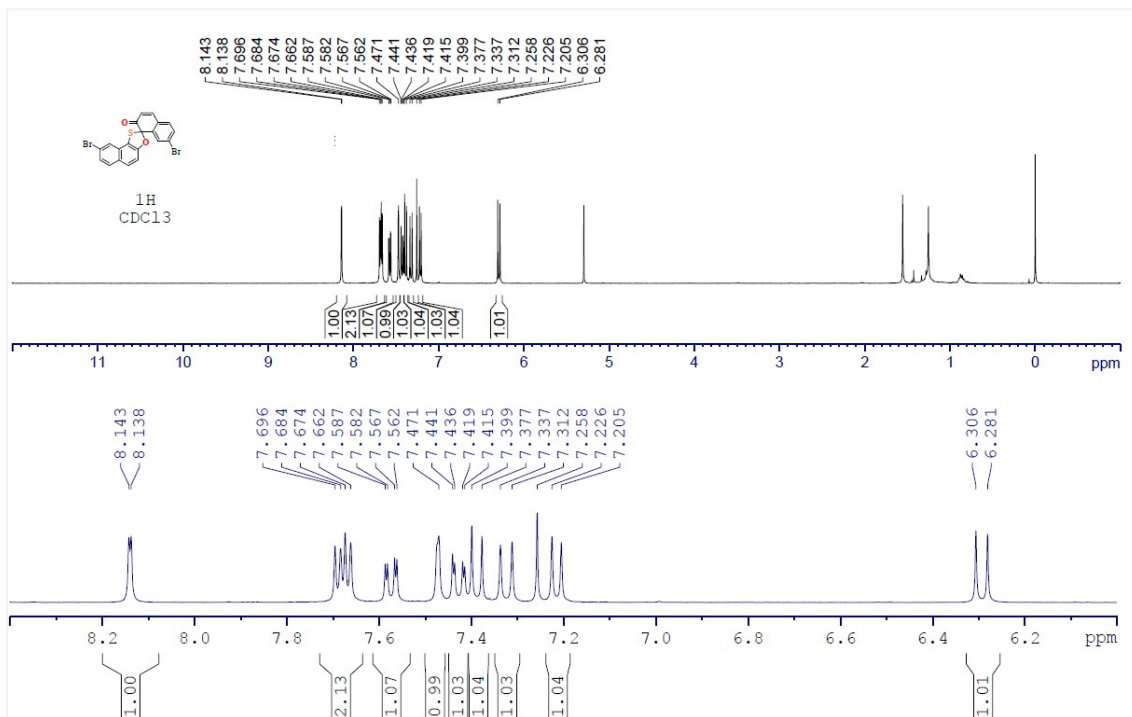

Figure S9. <sup>1</sup>H NMR (400 MHz, CDCl<sub>3</sub>) Spectrum of Compound 3d

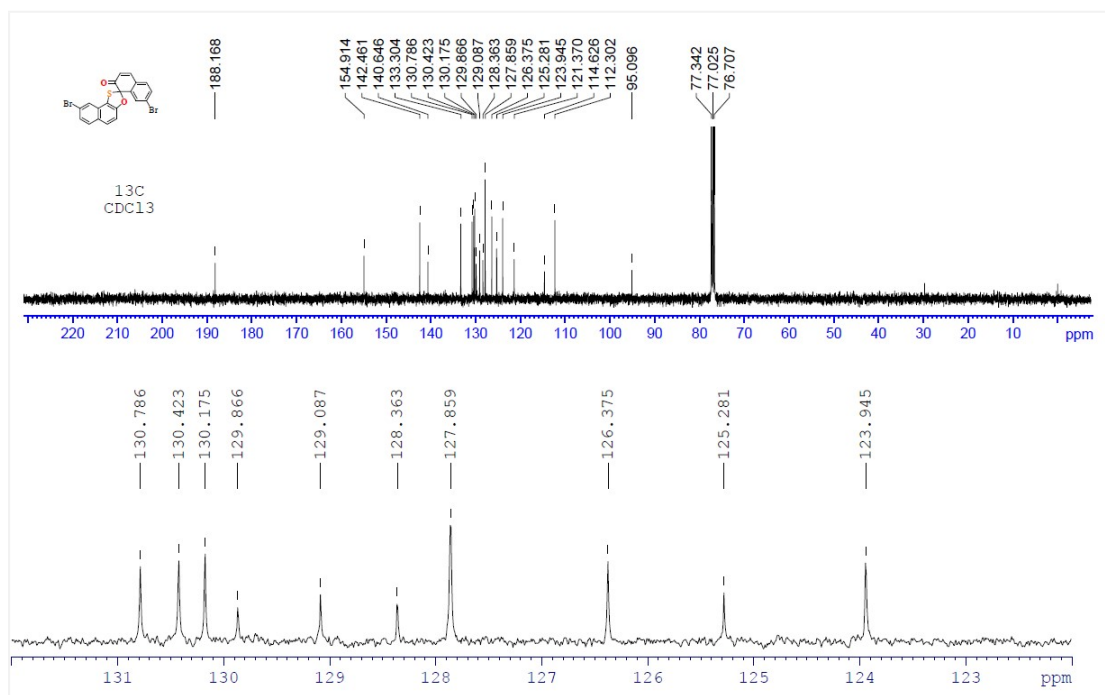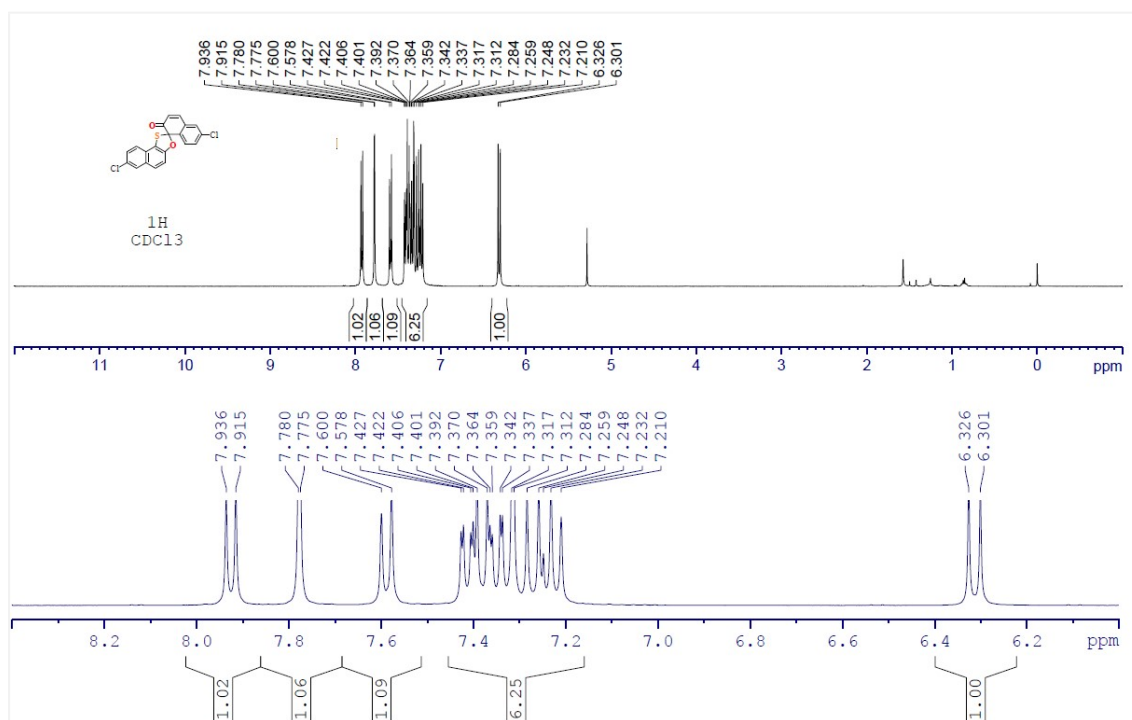

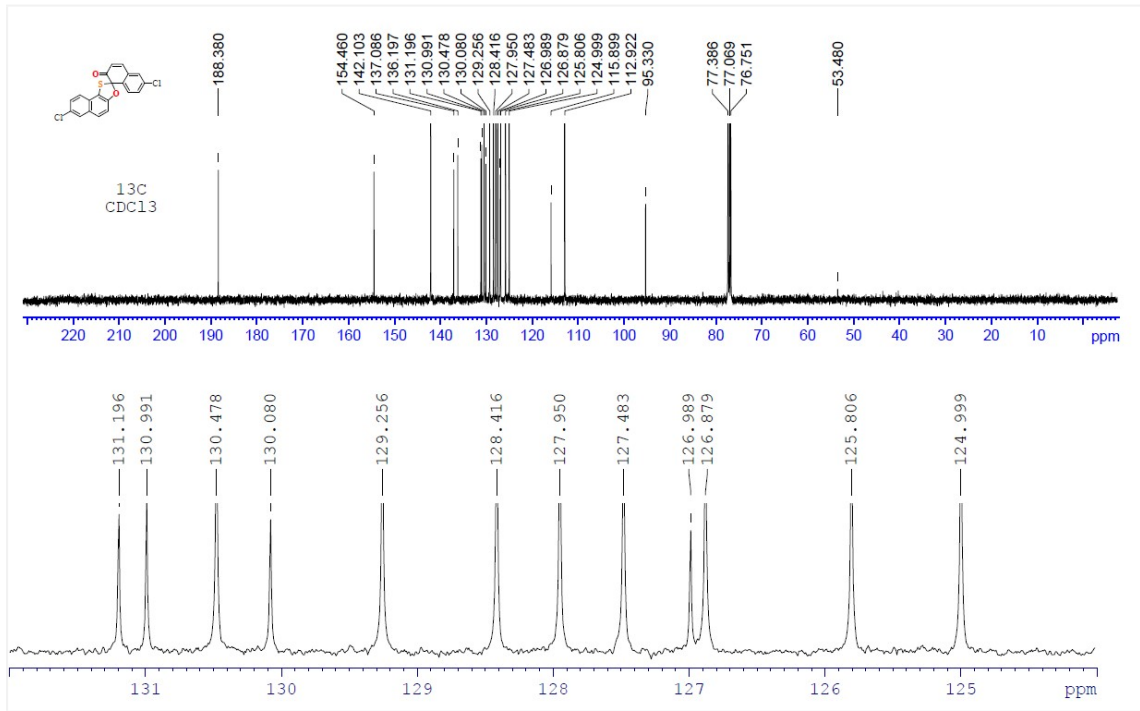

**Figure S12.** <sup>13</sup>C NMR (100 MHz, CDCl<sub>3</sub>) Spectrum of Compound 3e

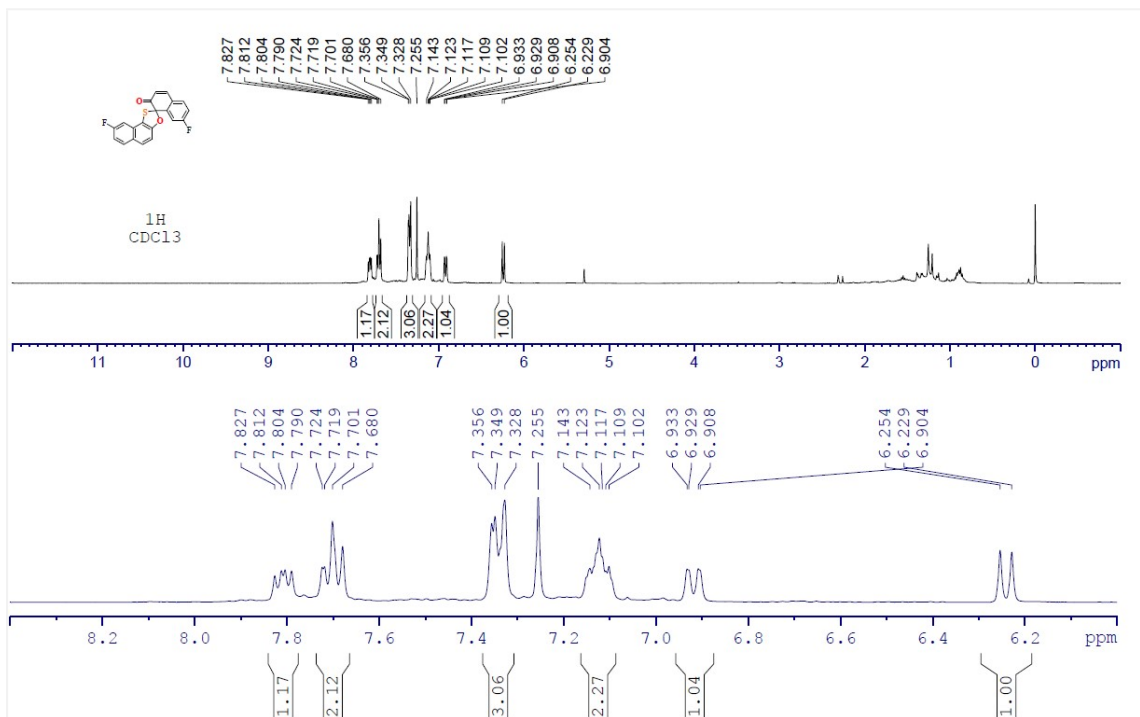

**Figure S13.** <sup>1</sup>H NMR (400 MHz, CDCl<sub>3</sub>) Spectrum of Compound 3f

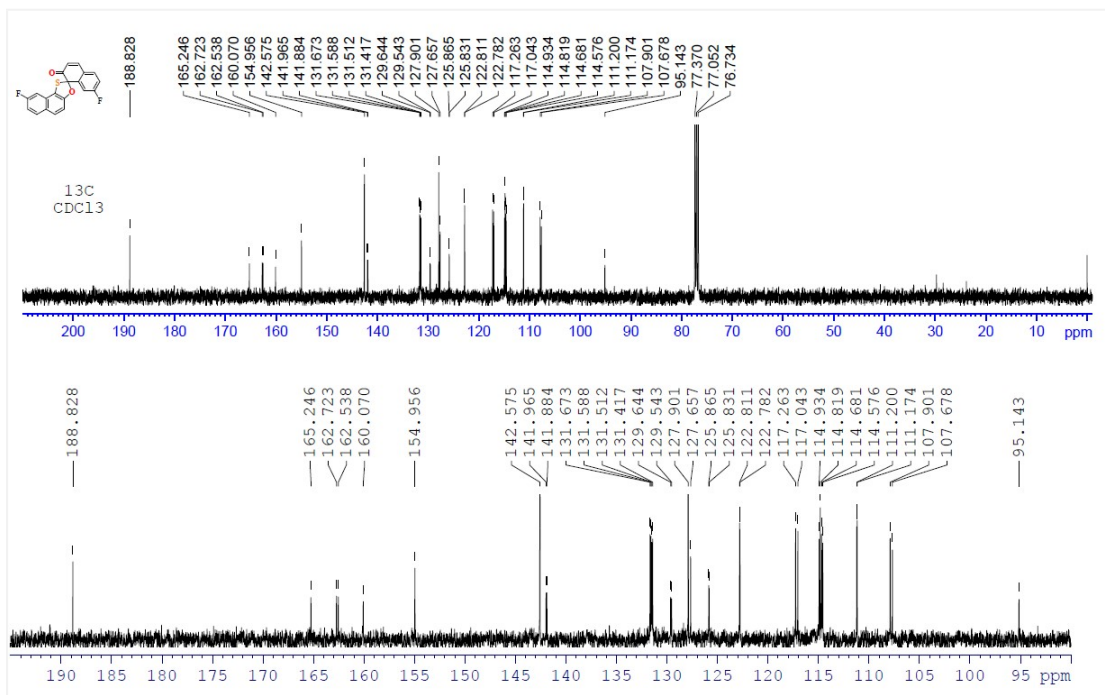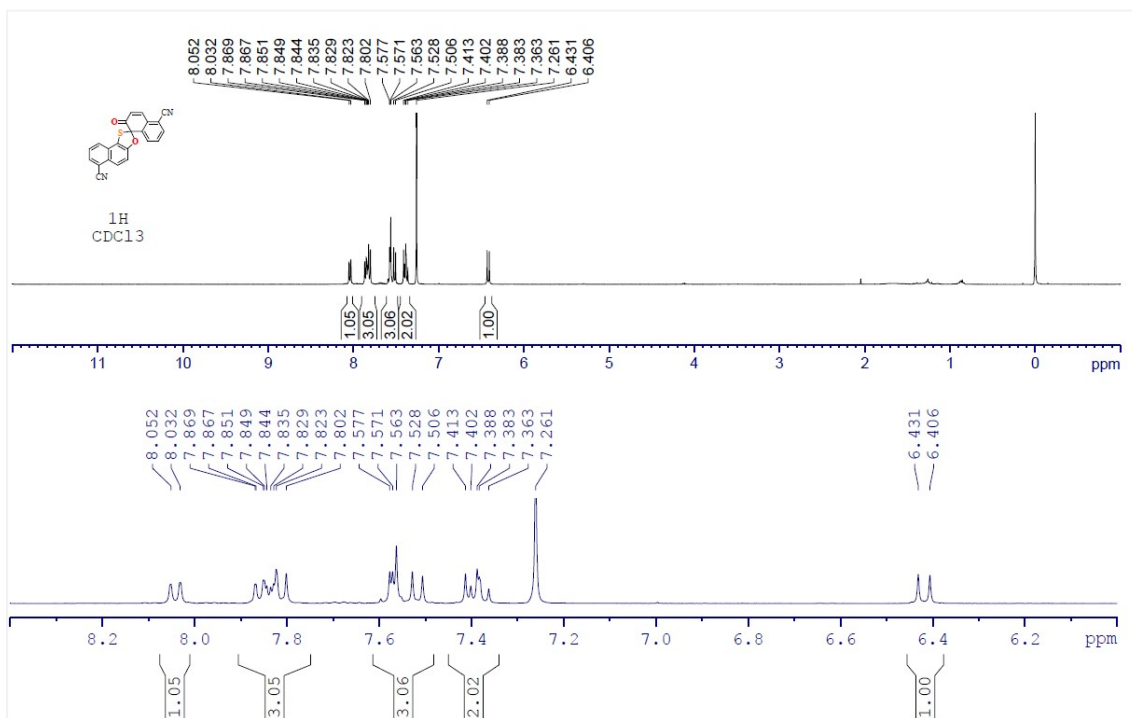

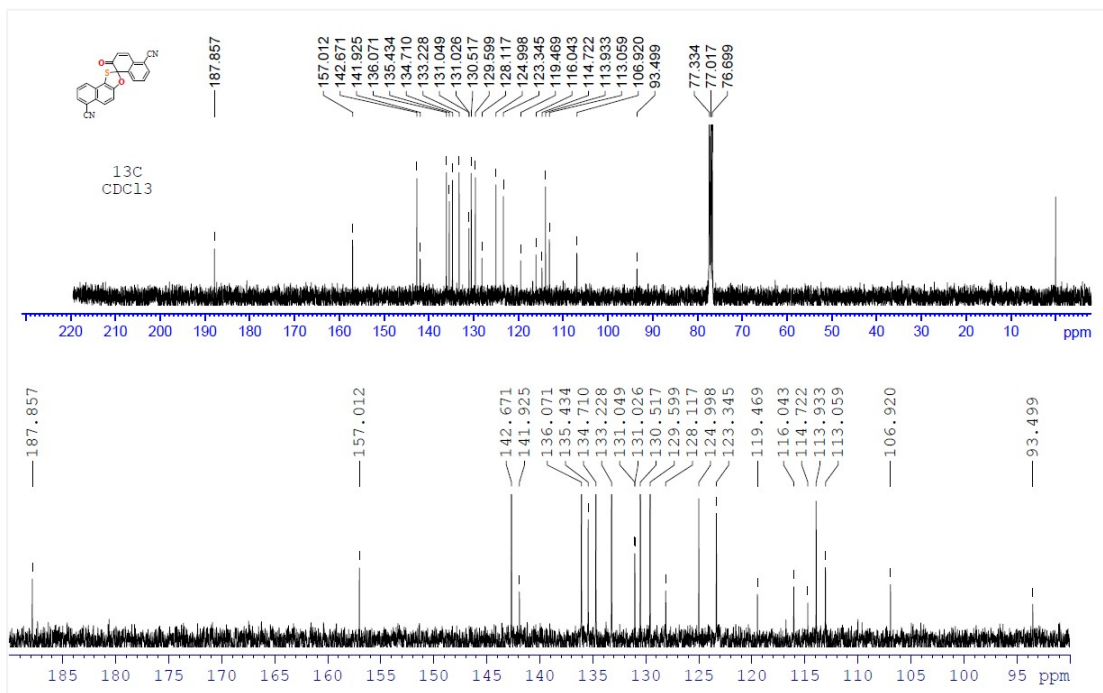

**Figure S16. <sup>13</sup>C NMR (100 MHz, CDCl<sub>3</sub>) Spectrum of Compound 3g**

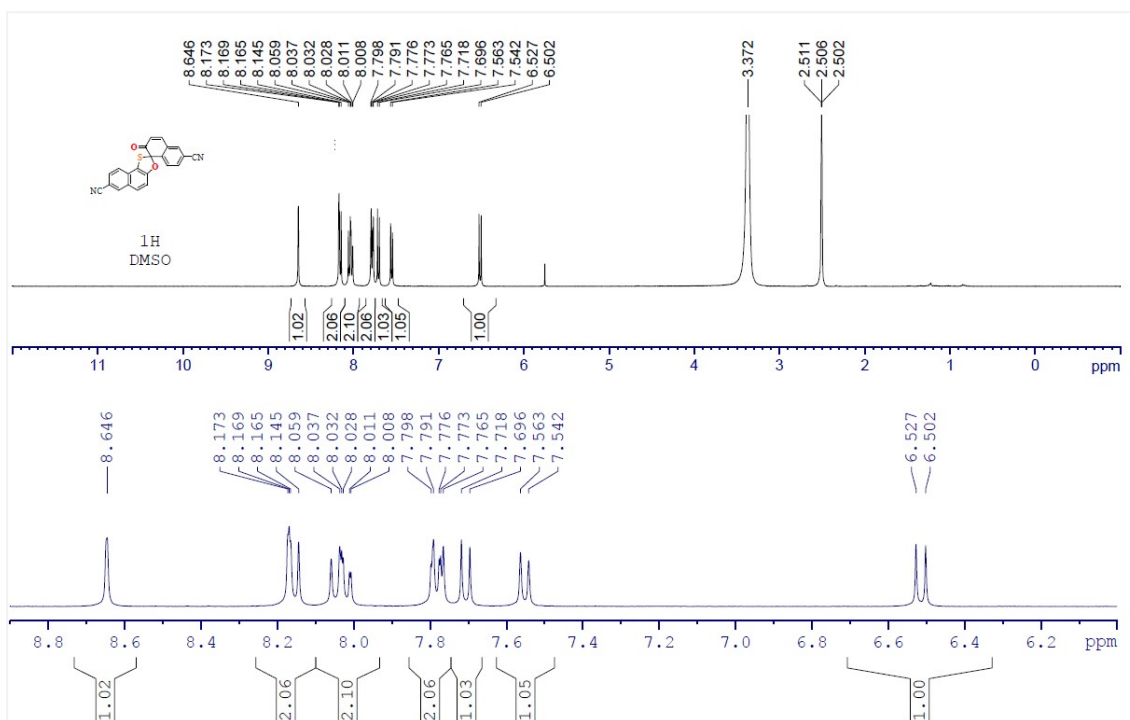

**Figure S17. <sup>1</sup>H NMR (400 MHz, DMSO-d<sub>6</sub>) Spectrum of Compound 3h**

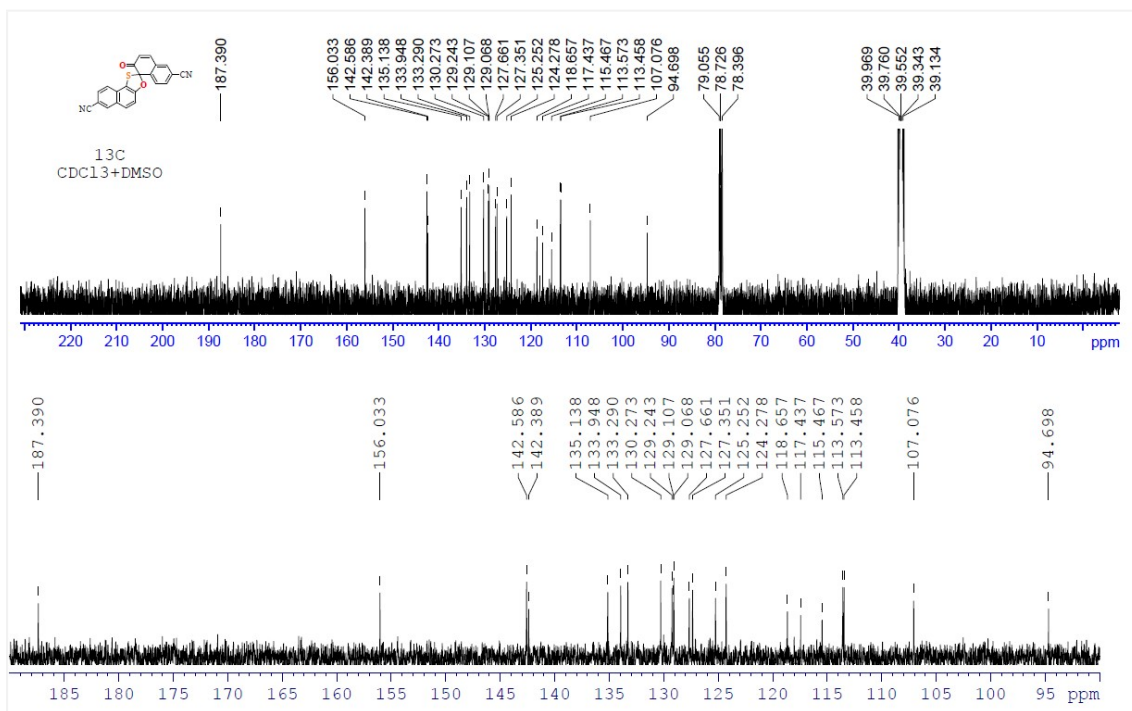

**Figure S18.** <sup>13</sup>C NMR (100 MHz, CDCl<sub>3</sub> + DMSO-d<sub>6</sub>) Spectrum of Compound 3h

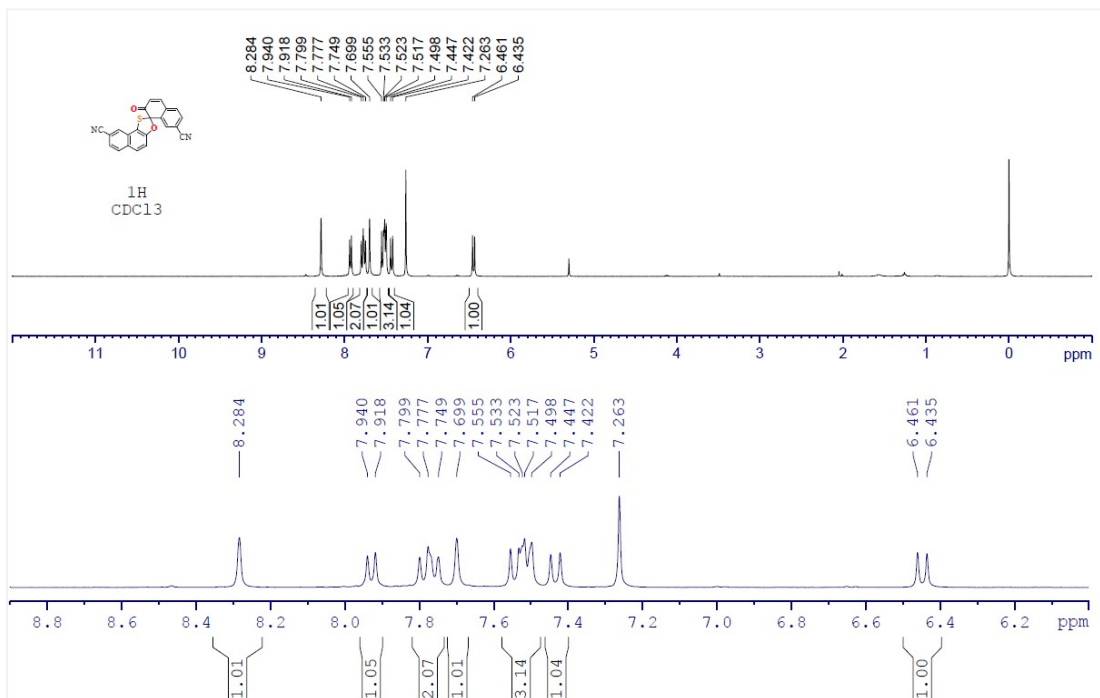

**Figure S19.** <sup>1</sup>H NMR (400 MHz, CDCl<sub>3</sub>) Spectrum of Compound 3i

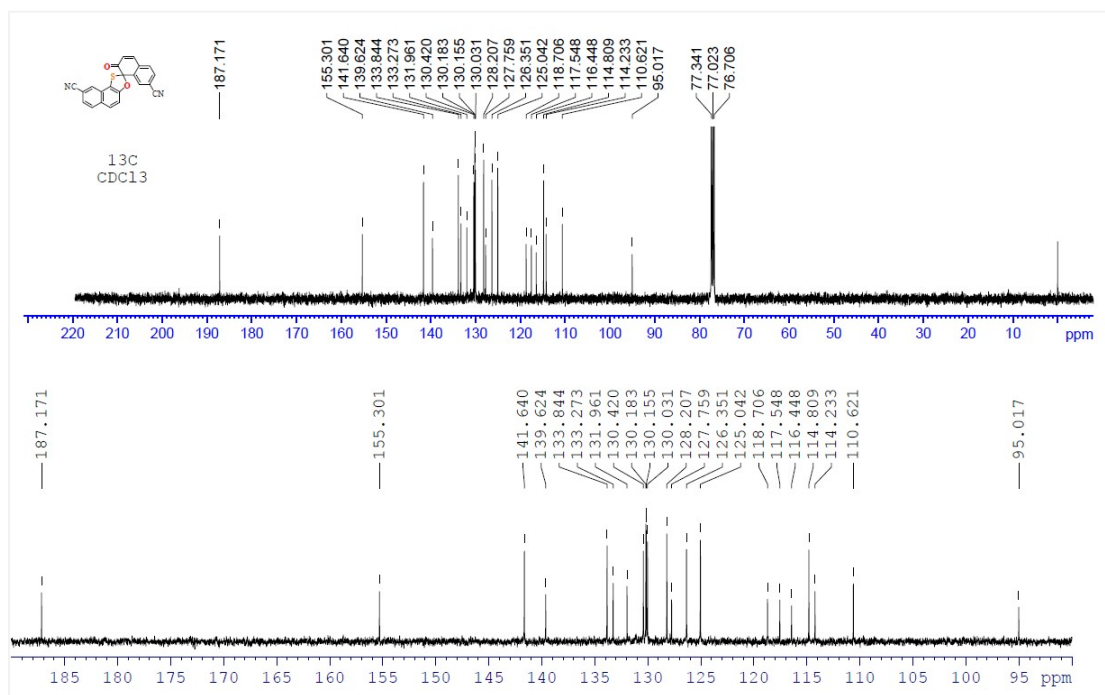

Figure S20. <sup>13</sup>C NMR (100 MHz, CDCl<sub>3</sub>) Spectrum of Compound 3i

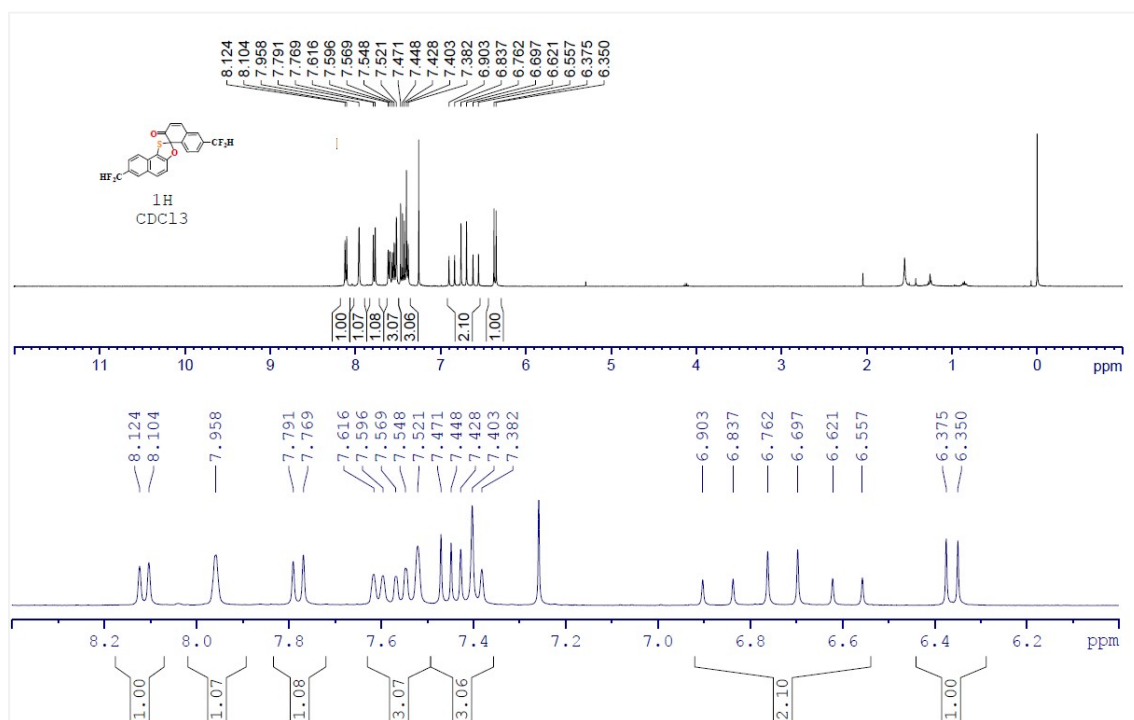

Figure S21. <sup>1</sup>H NMR (400 MHz, CDCl<sub>3</sub>) Spectrum of Compound 3j

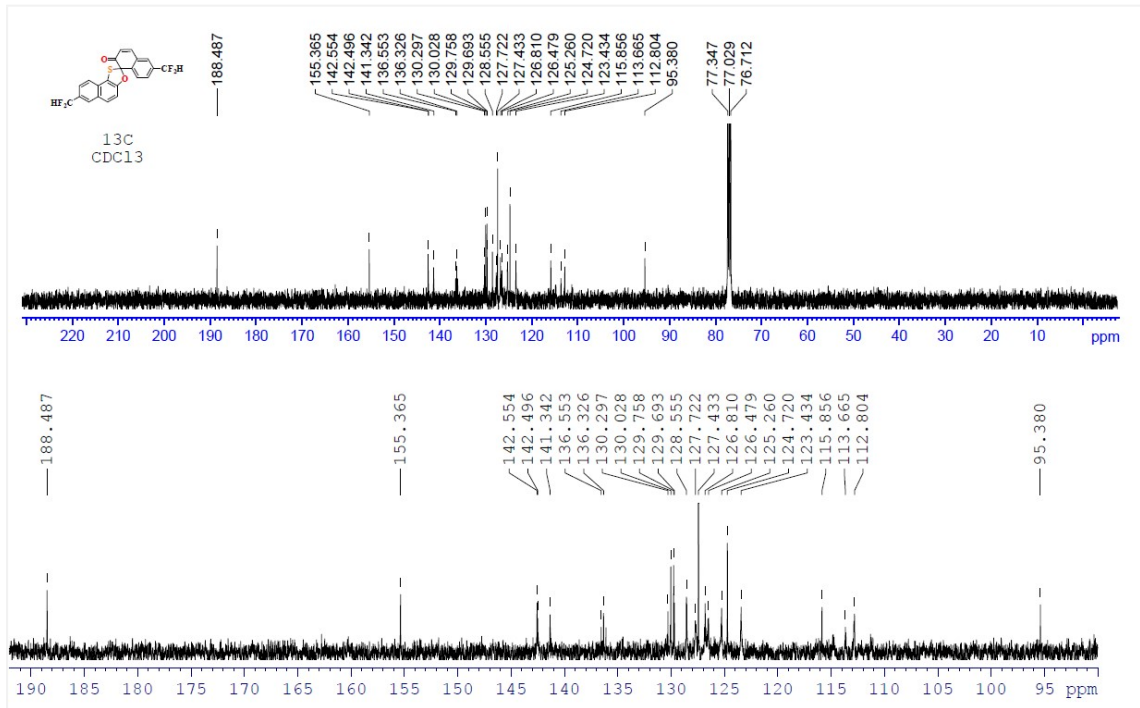

**Figure S22** <sup>13</sup>C NMR (100 MHz, CDCl<sub>3</sub>) Spectrum of Compound 3j

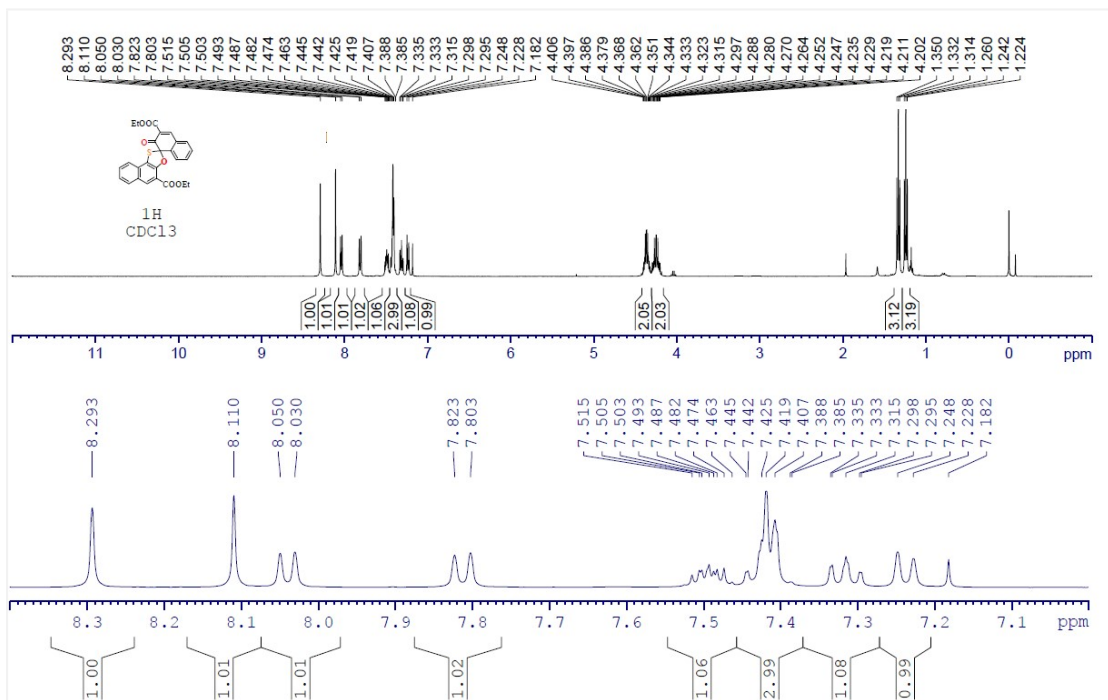

**Figure S23** <sup>1</sup>H NMR (400 MHz, CDCl<sub>3</sub>) Spectrum of Compound 3k



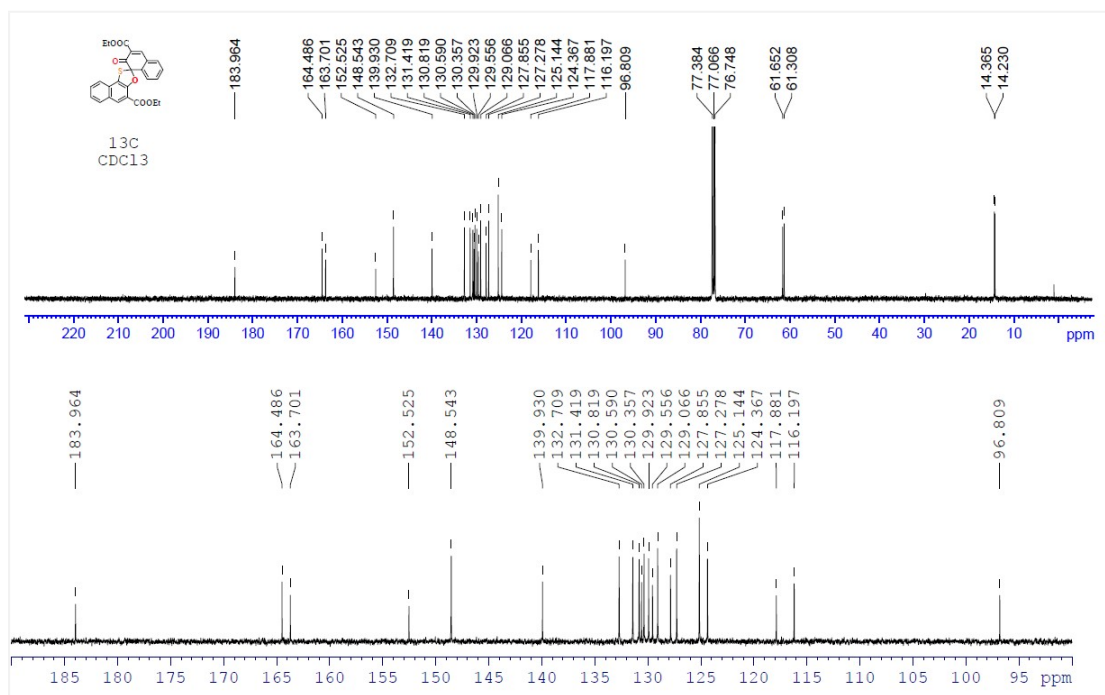

Figure S24. <sup>13</sup>C NMR (100 MHz, CDCl<sub>3</sub>) Spectrum of Compound 3k

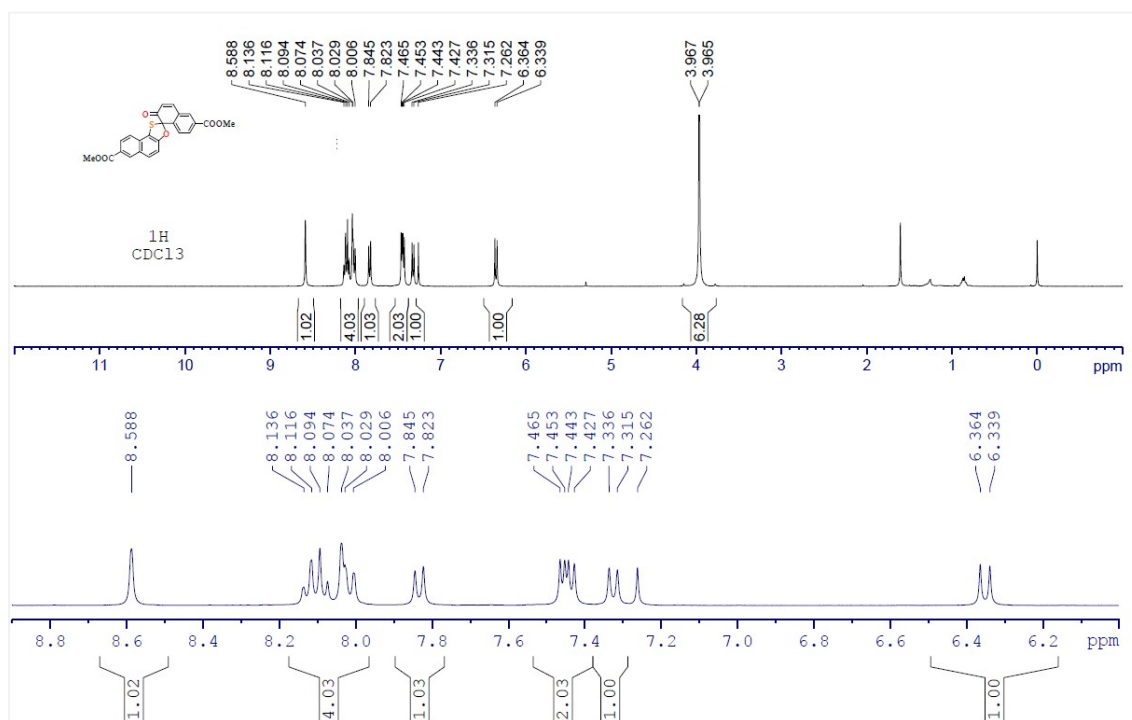

Figure S25. <sup>1</sup>H NMR (400 MHz, CDCl<sub>3</sub>) Spectrum of Compound 3l

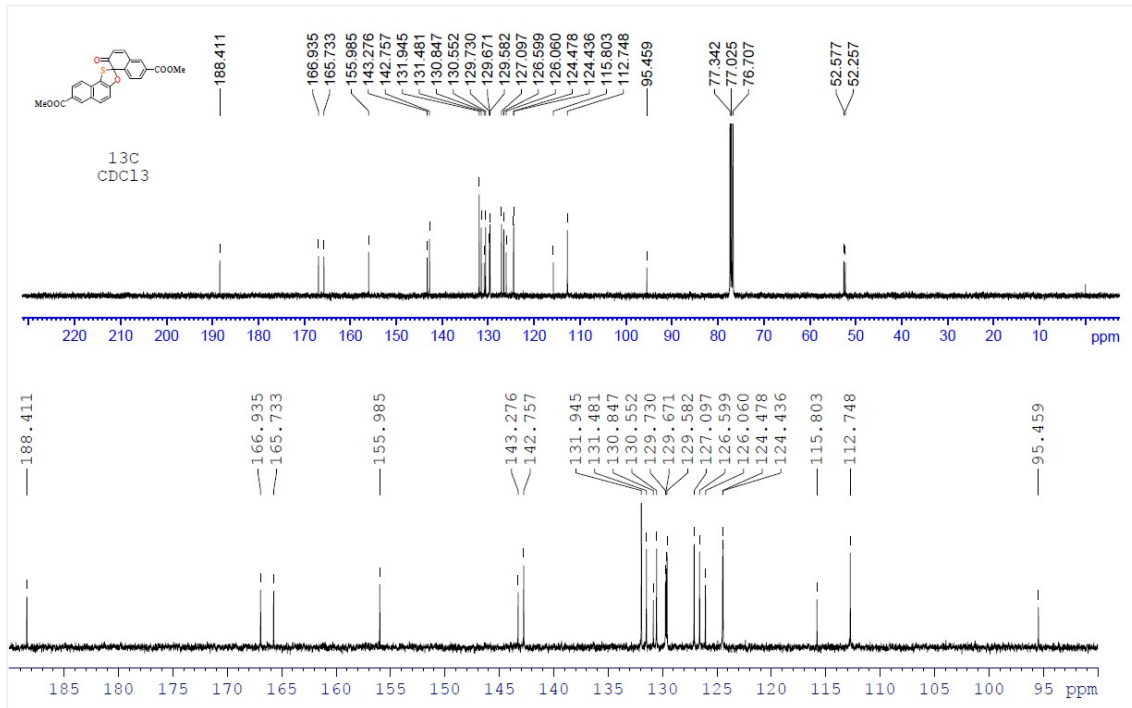

Figure S26. <sup>13</sup>C NMR (100 MHz, CDCl<sub>3</sub>) Spectrum of Compound 3l

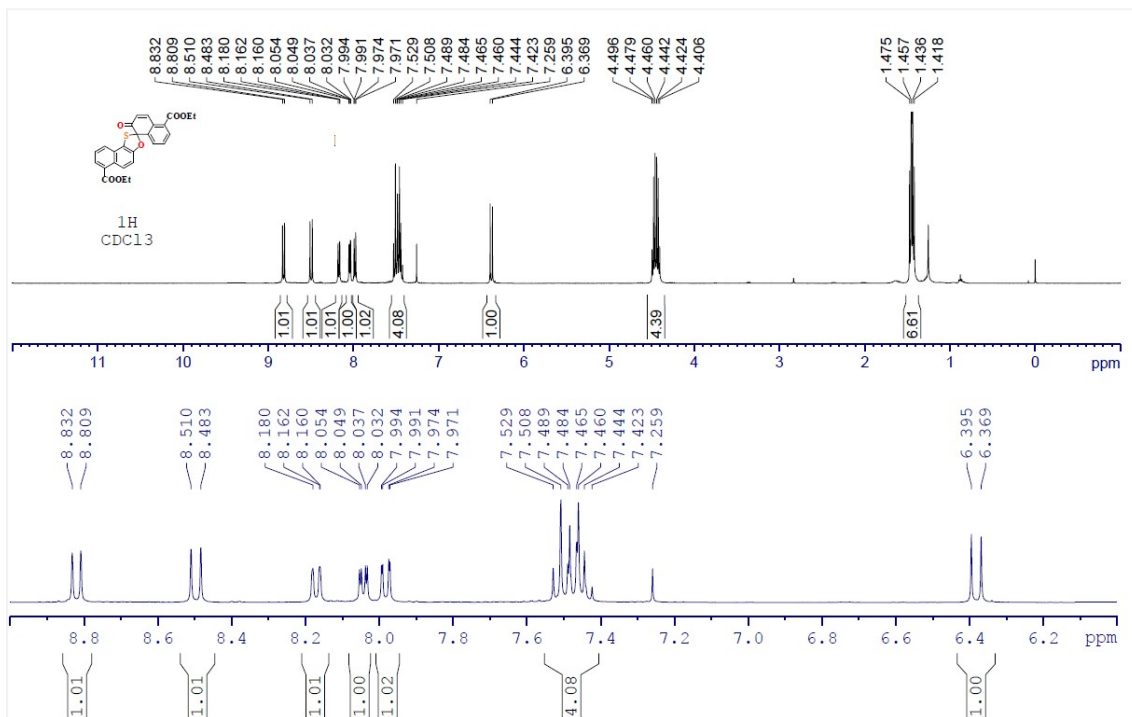

Figure S27. <sup>1</sup>H NMR (400 MHz, CDCl<sub>3</sub>) Spectrum of Compound 3m

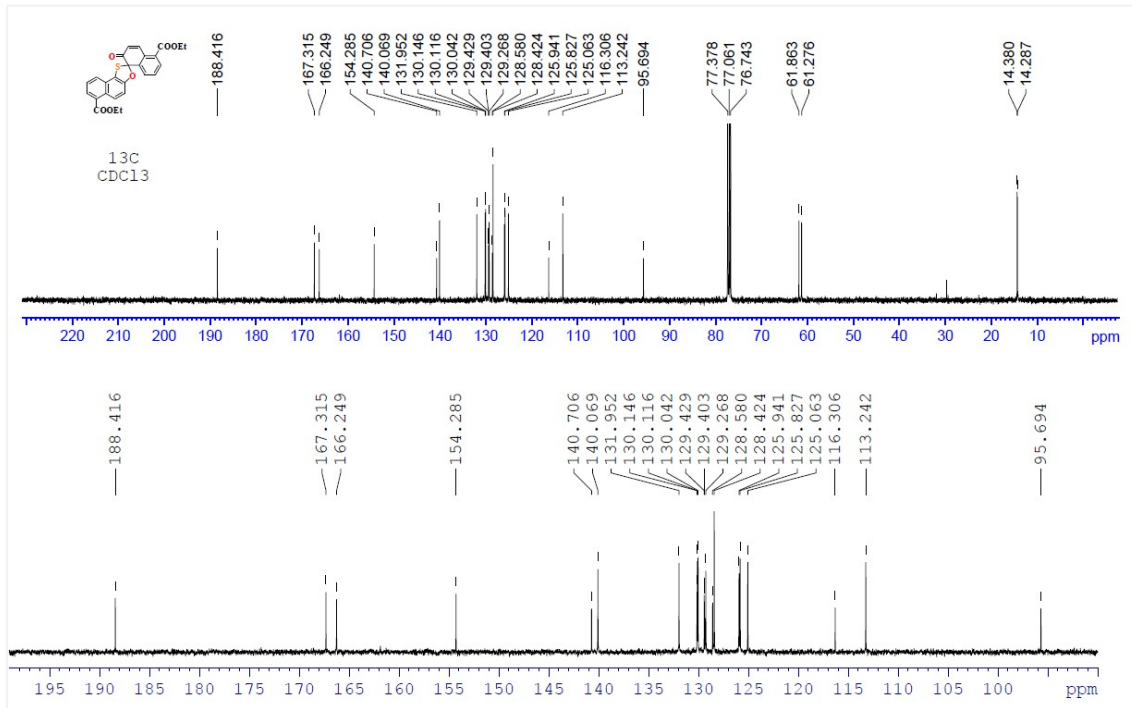

**Figure S28.  $^{13}\text{C}$  NMR (100 MHz,  $\text{CDCl}_3$ ) Spectrum of Compound 3m**

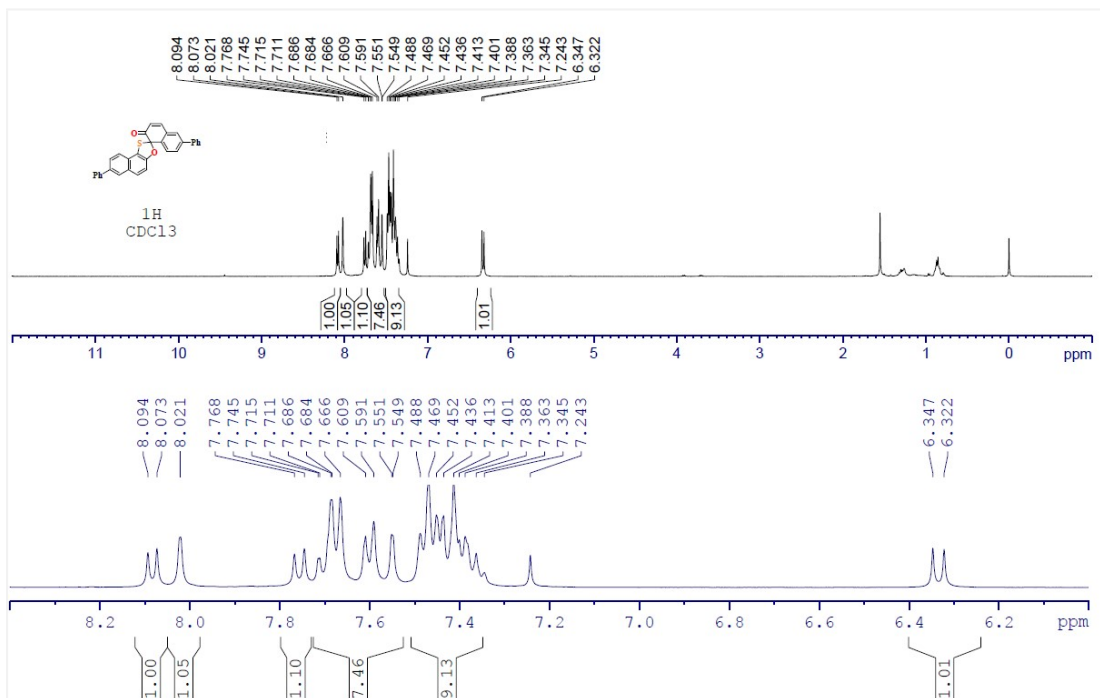

**Figure S29.  $^1\text{H}$  NMR (400 MHz,  $\text{CDCl}_3$ ) Spectrum of Compound 3o**

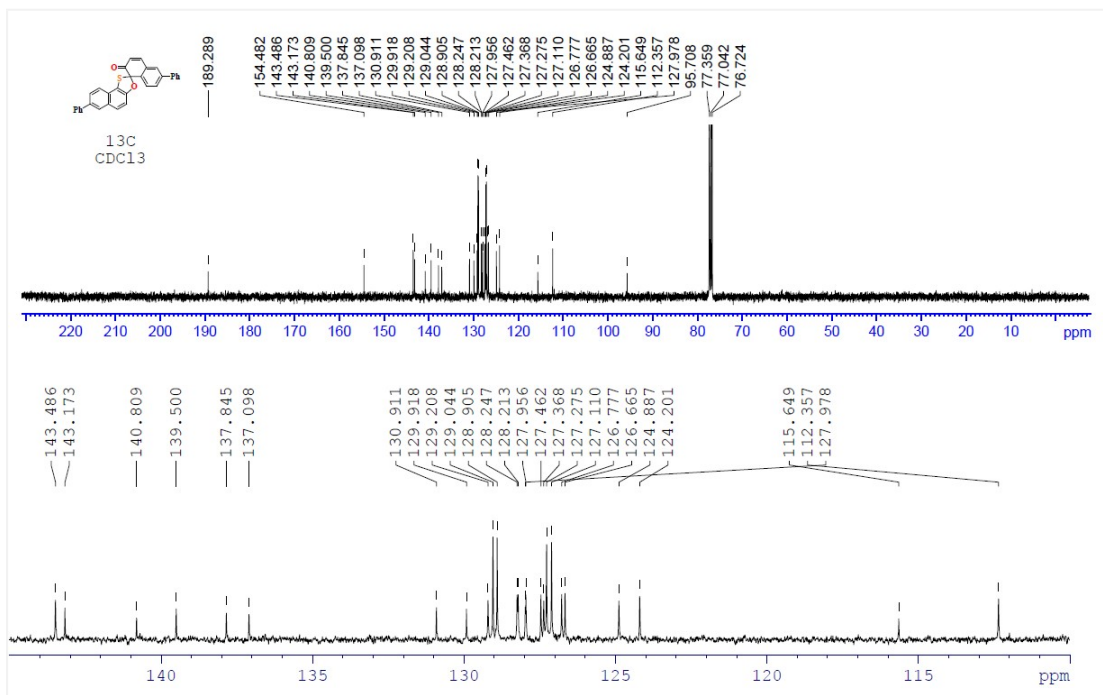

**Figure S30.** <sup>13</sup>C NMR (100 MHz, CDCl<sub>3</sub>) Spectrum of Compound 3o

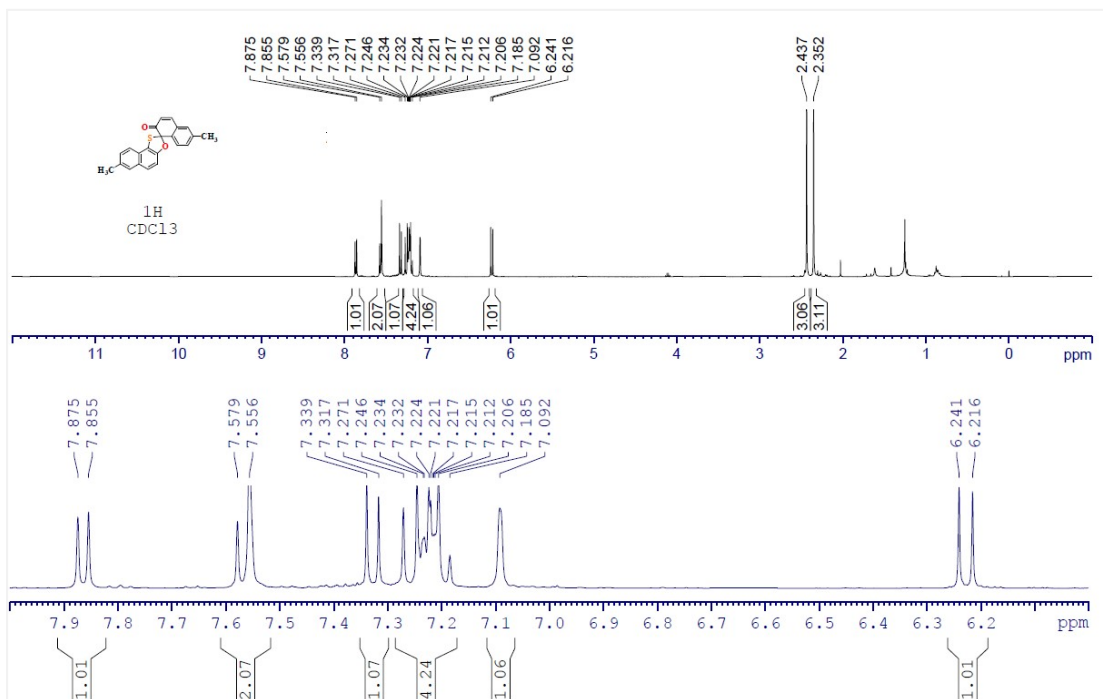

**Figure S31.** <sup>1</sup>H NMR (400 MHz, CDCl<sub>3</sub>) Spectrum of Compound 3p

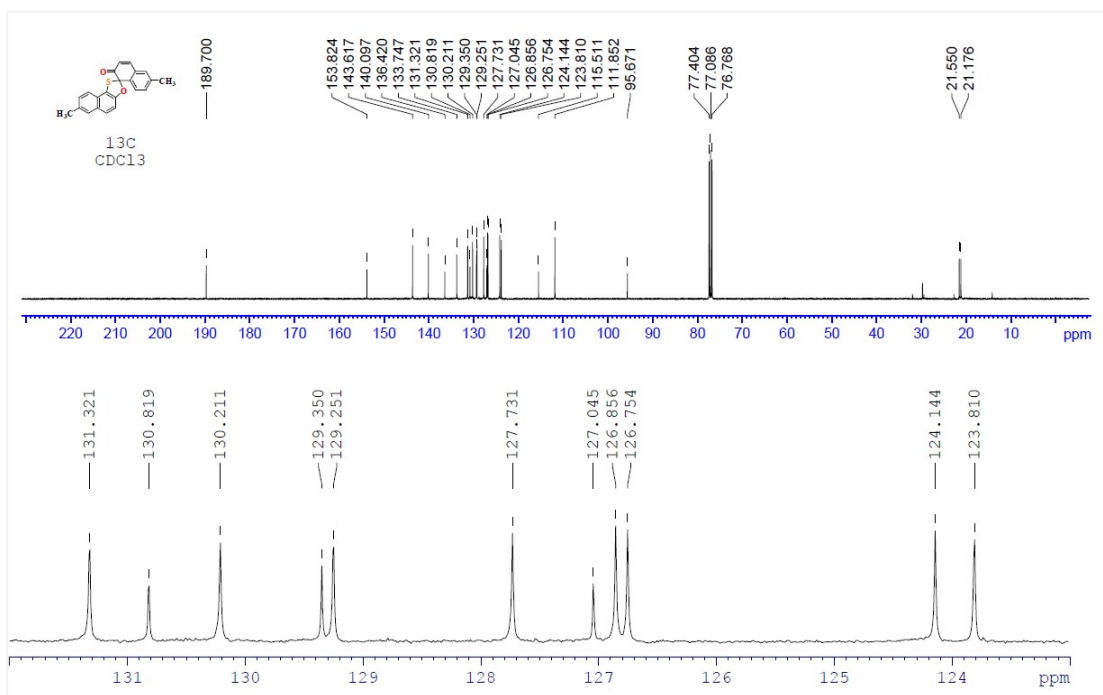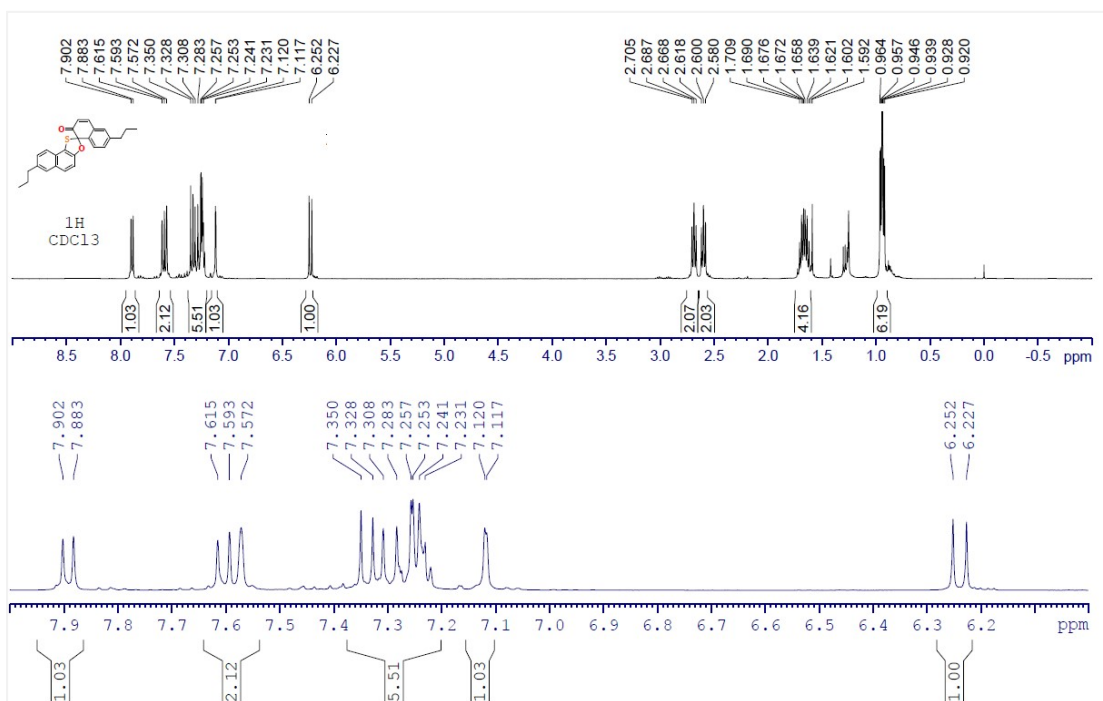

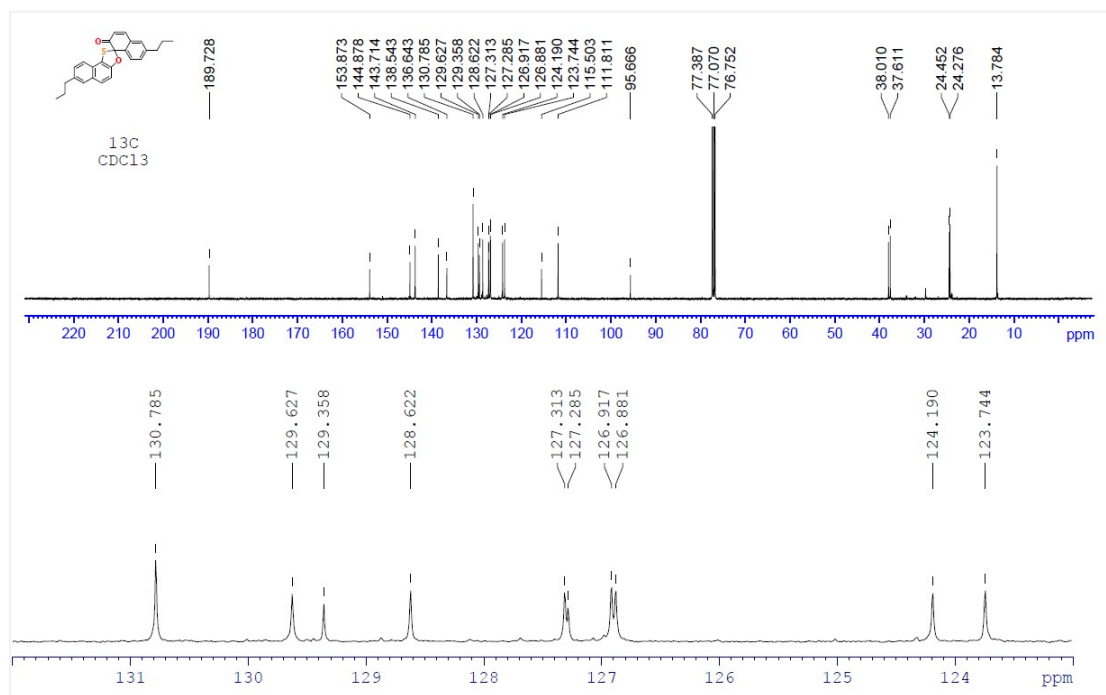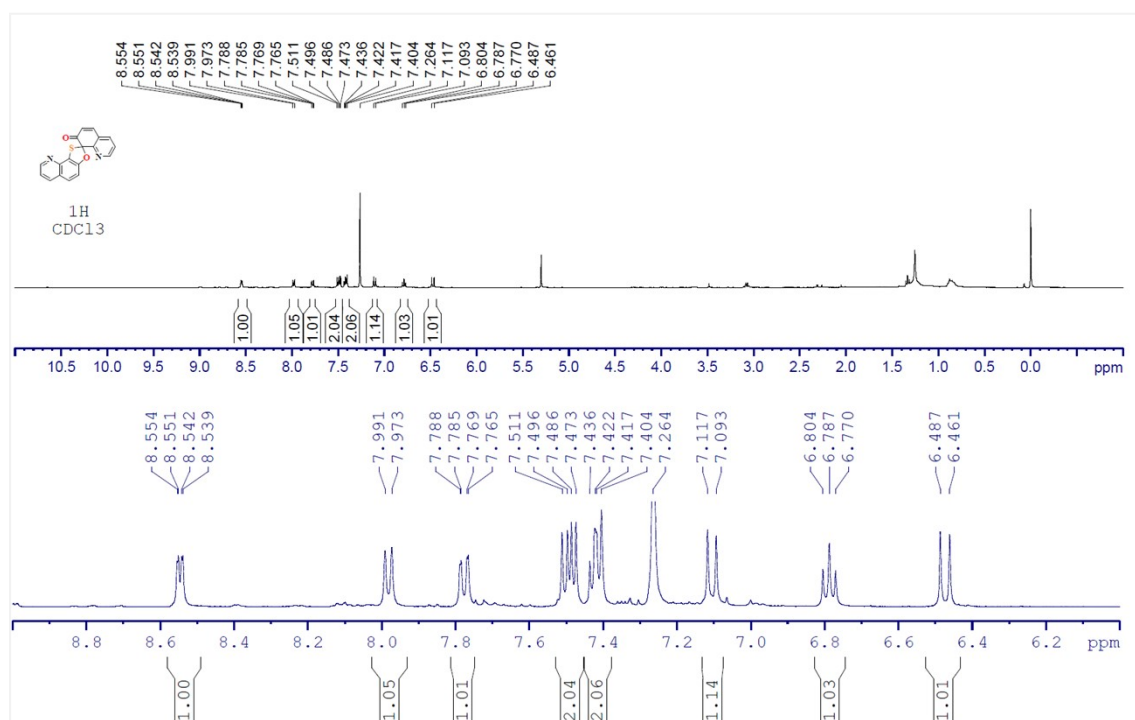

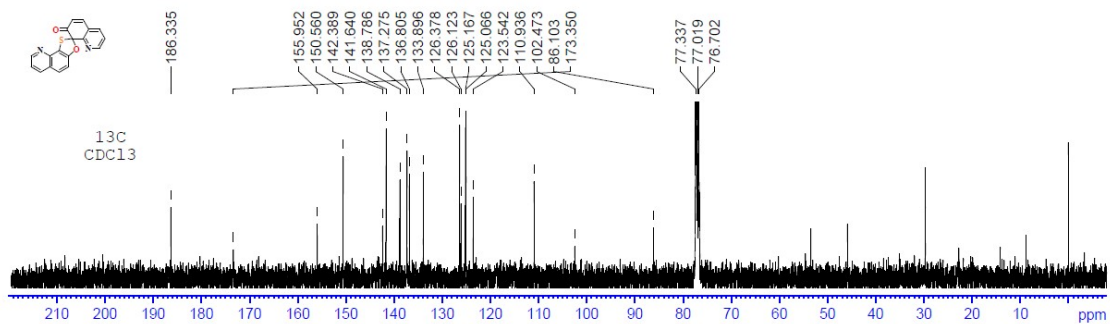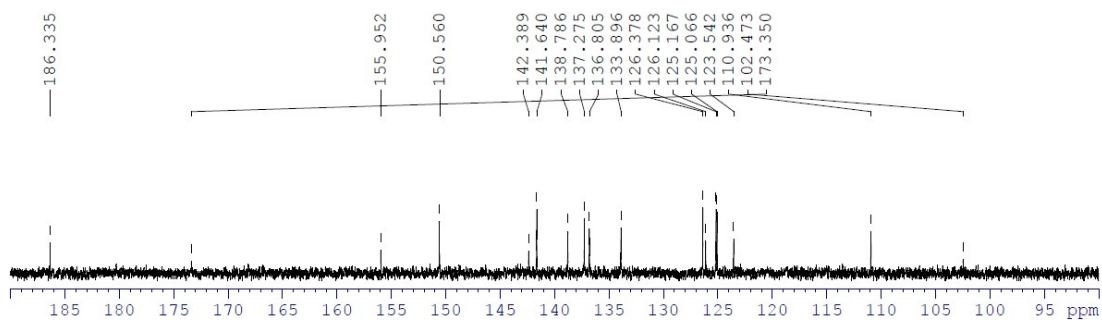

Figure S36. <sup>13</sup>C NMR (100 MHz, CDCl<sub>3</sub>) Spectrum of Compound 3r

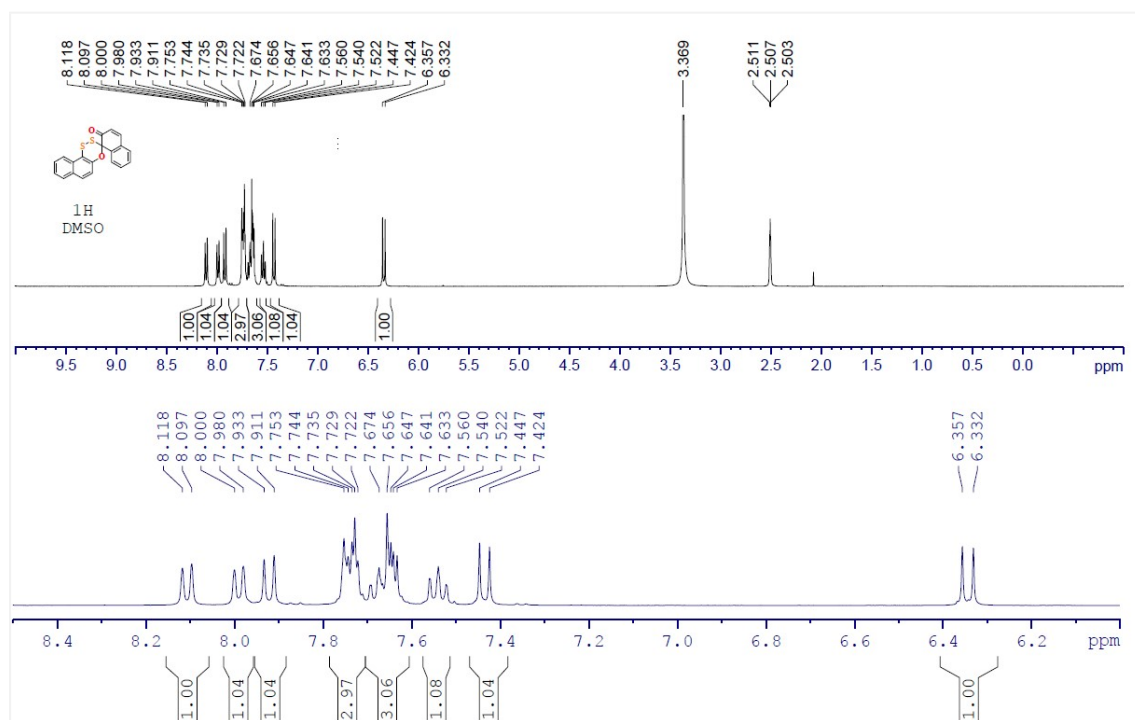

Figure S37. <sup>1</sup>H NMR (400 MHz, DMSO-d<sub>6</sub>) Spectrum of Compound 2a

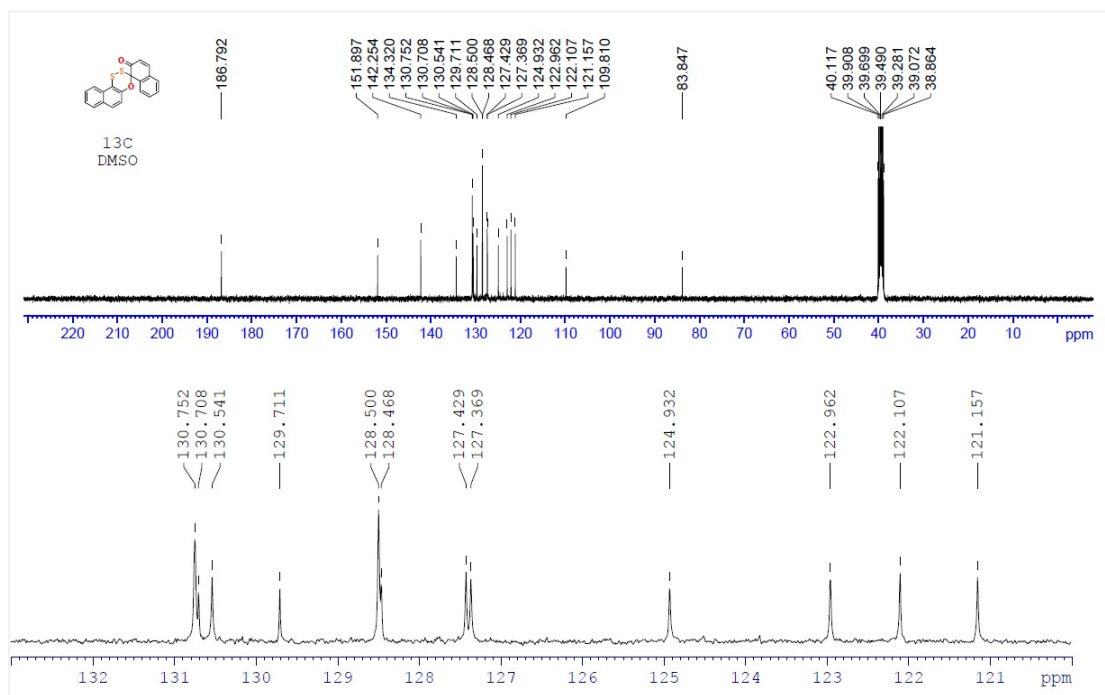

**Figure S38.** <sup>13</sup>C NMR (100 MHz, DMSO-d<sub>6</sub>) Spectrum of Compound 2a

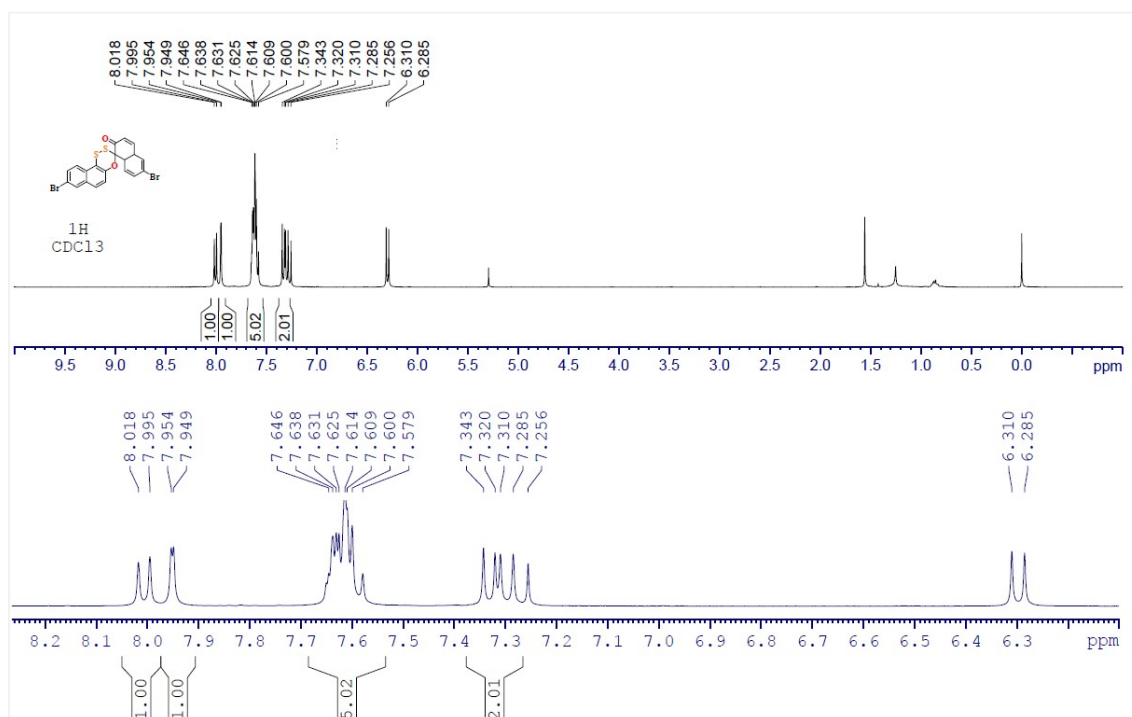

**Figure S39.** <sup>1</sup>H NMR (400 MHz, CDCl<sub>3</sub>) Spectrum of Compound 2b



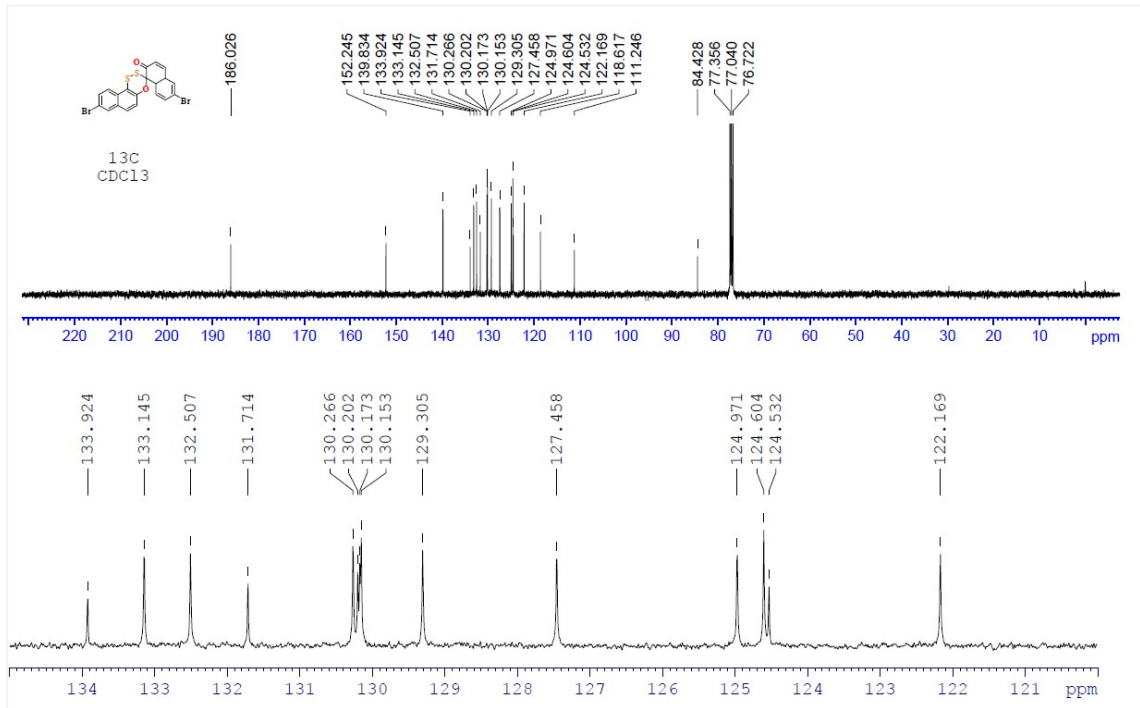

Figure S40. <sup>13</sup>C NMR (100 MHz, CDCl<sub>3</sub>) Spectrum of Compound 2b

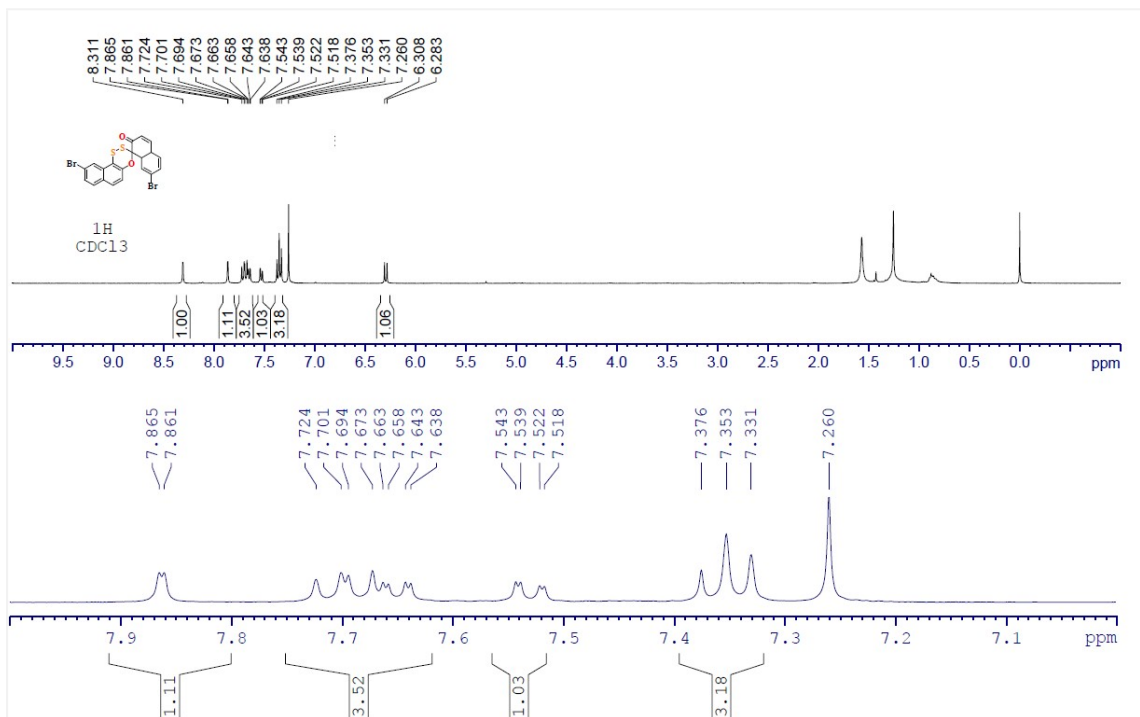

Figure 41 <sup>1</sup>H NMR (400 MHz, CDCl<sub>3</sub>) Spectrum of Compound 2c

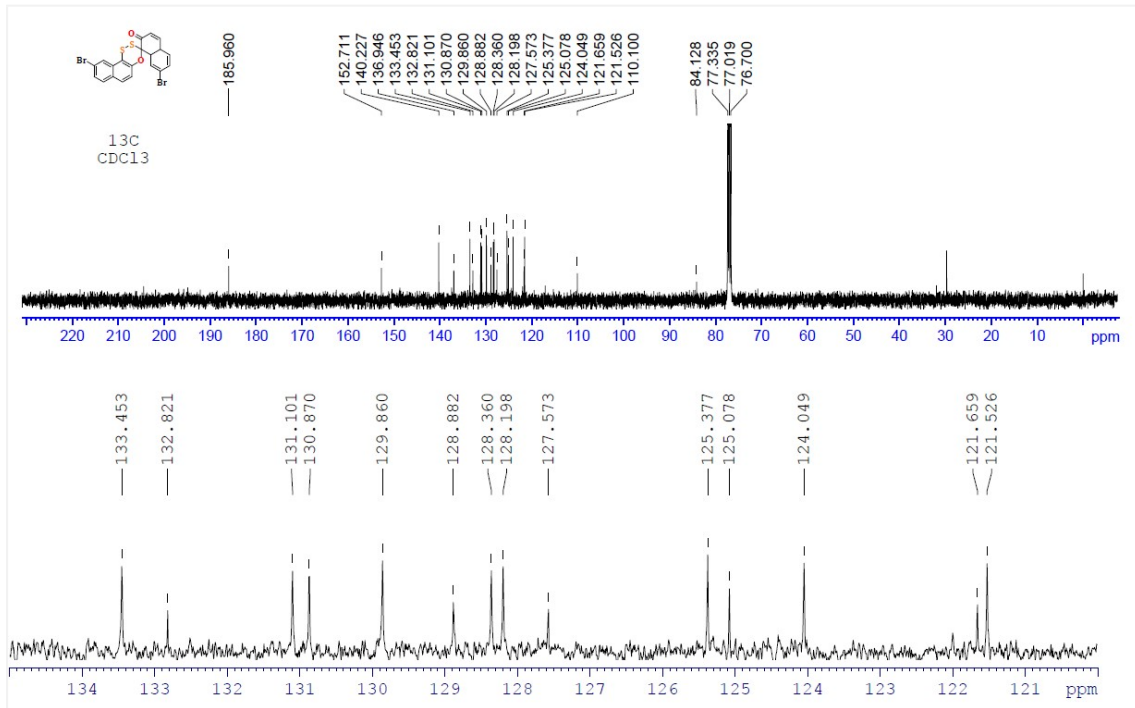

**Figure S42.** <sup>13</sup>C NMR (100 MHz, CDCl<sub>3</sub>) Spectrum of Compound 2c

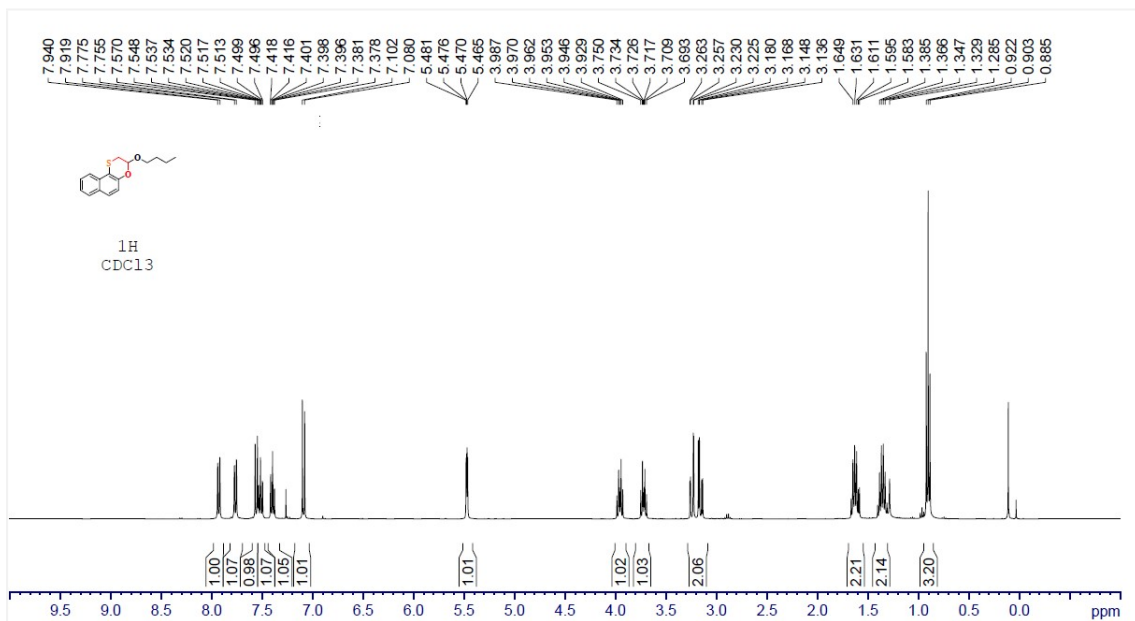

**Figure S43.** <sup>1</sup>H NMR (400 MHz, CDCl<sub>3</sub>) Spectrum of Compound 5a

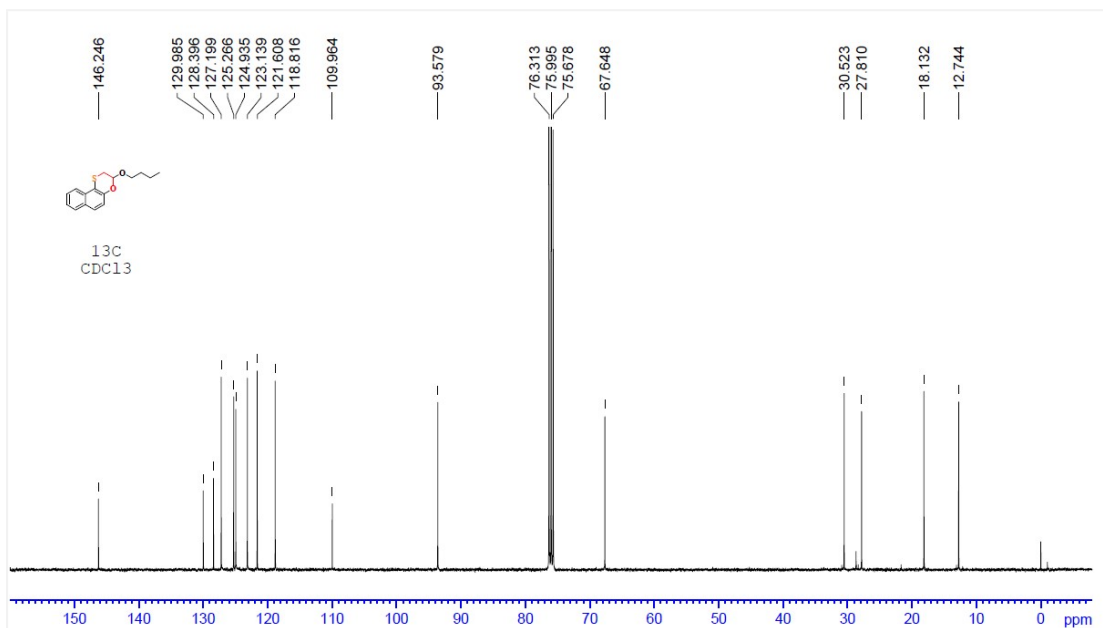

**Figure S44.** <sup>13</sup>C NMR (100 MHz, CDCl<sub>3</sub>) Spectrum of Compound 5a

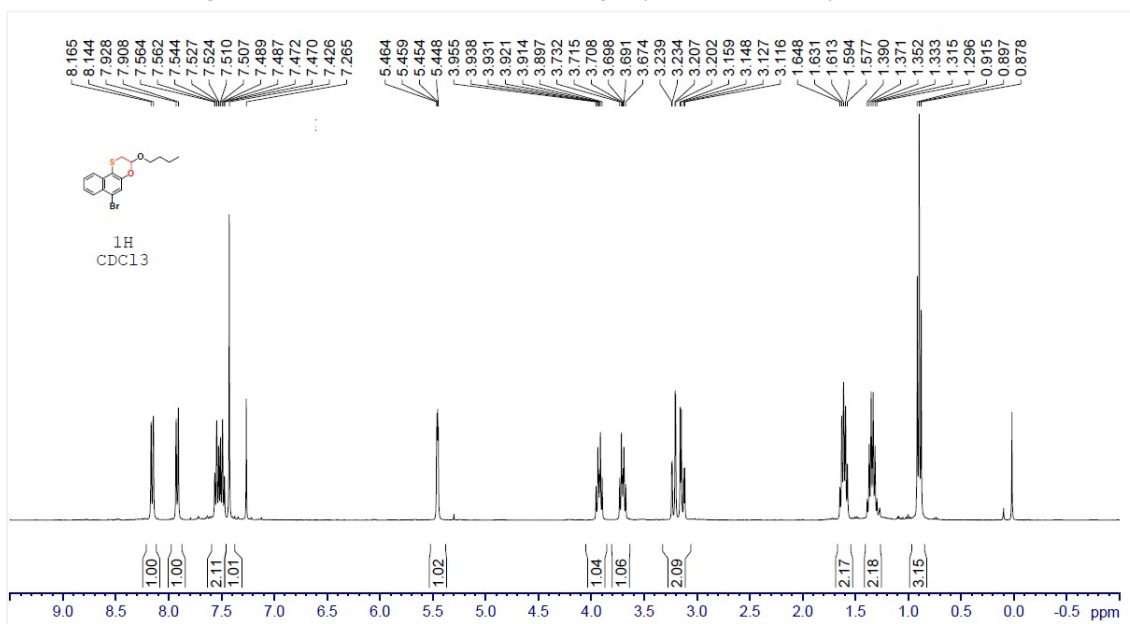

**Figure S45.** <sup>1</sup>H NMR (400 MHz, CDCl<sub>3</sub>) Spectrum of Compound 5b

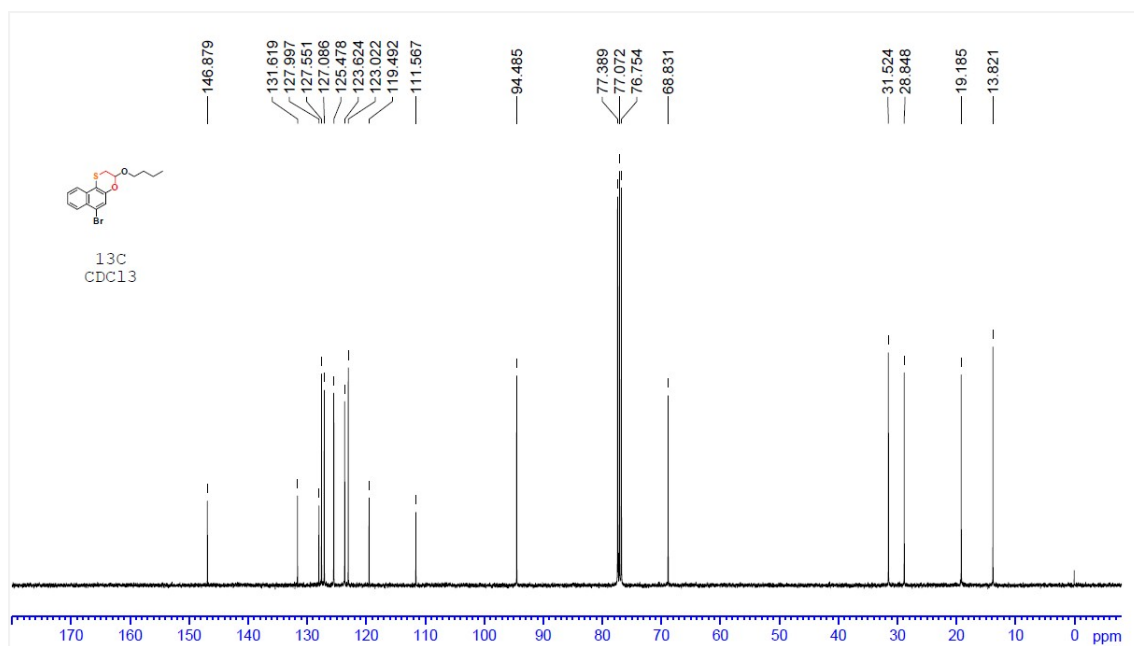

Figure S46. <sup>13</sup>C NMR (100 MHz, CDCl<sub>3</sub>) Spectrum of Compound 5b

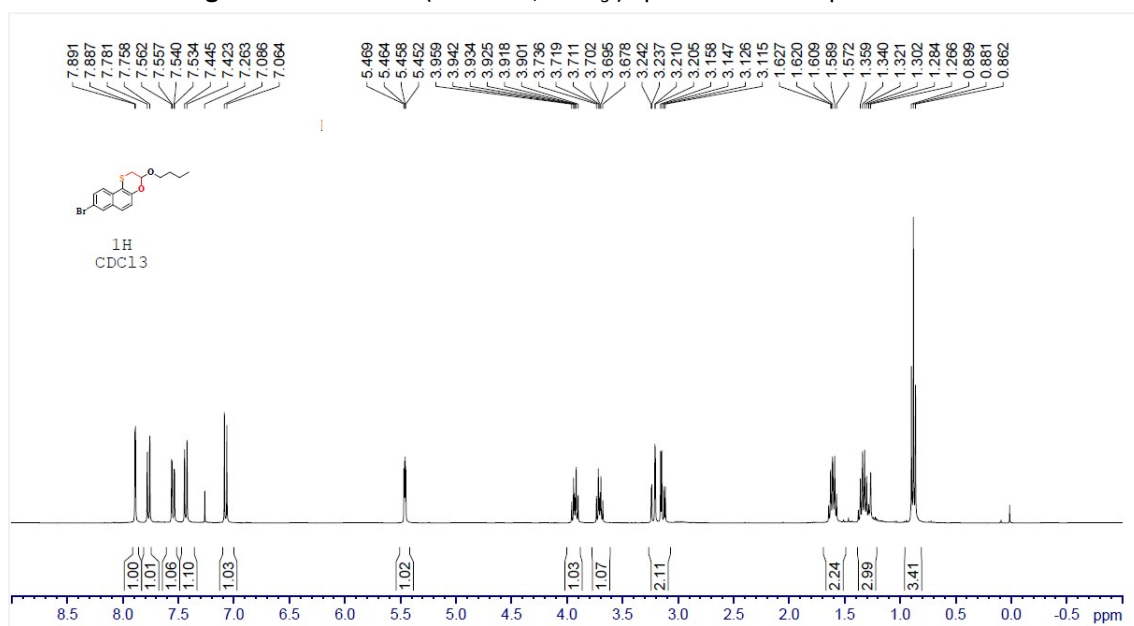

Figure S47. <sup>1</sup>H NMR (400 MHz, CDCl<sub>3</sub>) Spectrum of Compound 5c

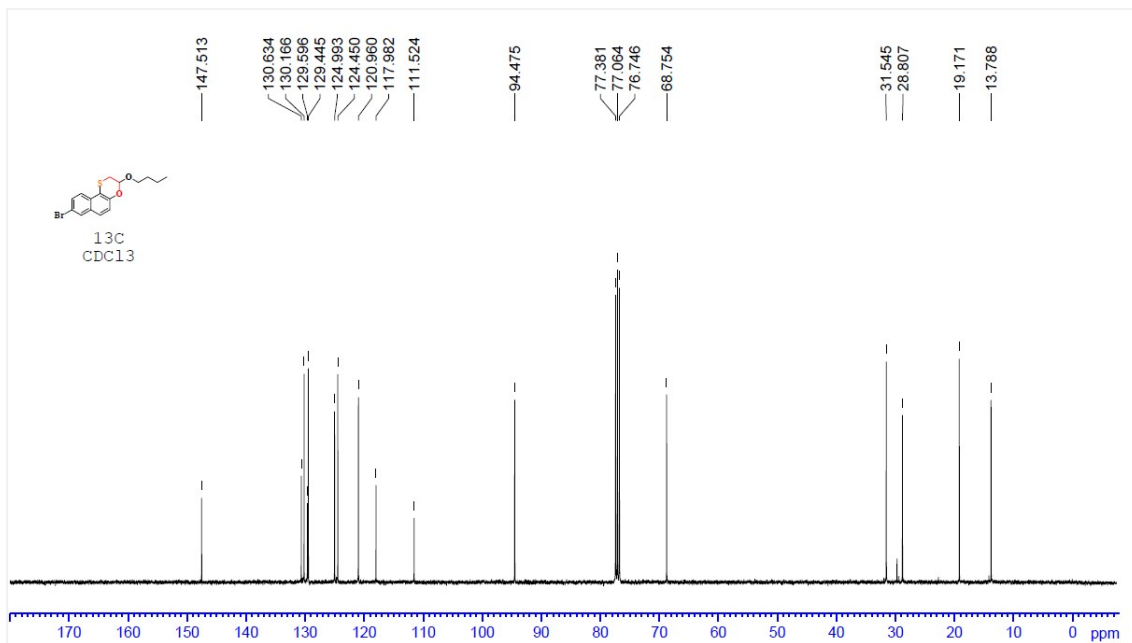

Figure S48. <sup>13</sup>C NMR (100 MHz, CDCl<sub>3</sub>) Spectrum of Compound 5c

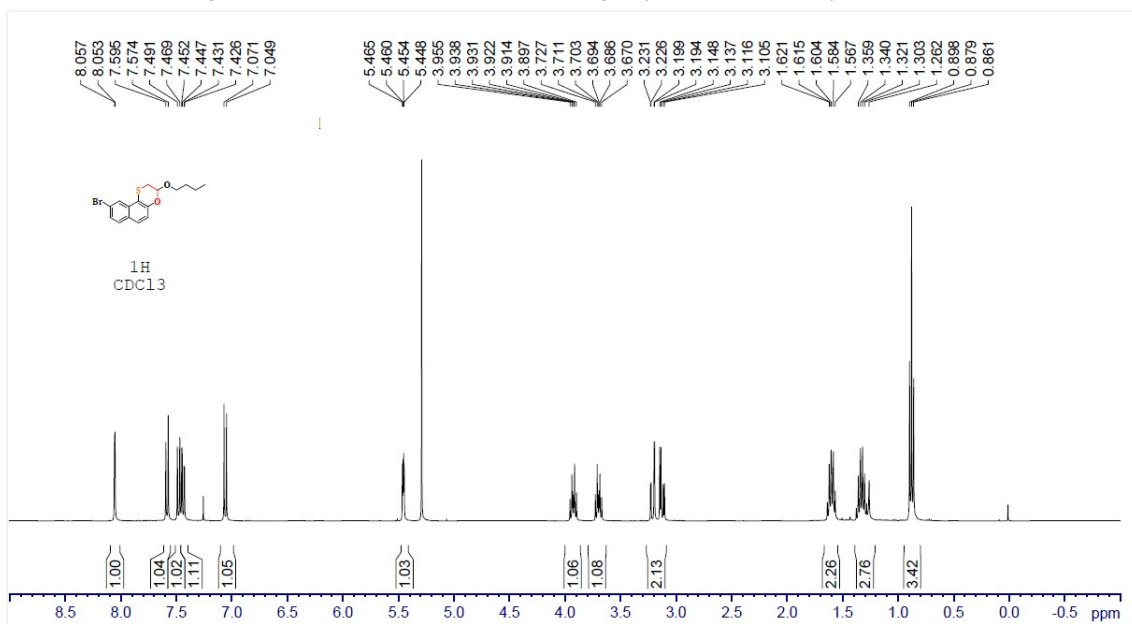

Figure S49. <sup>1</sup>H NMR (400 MHz, CDCl<sub>3</sub>) Spectrum of Compound 5d

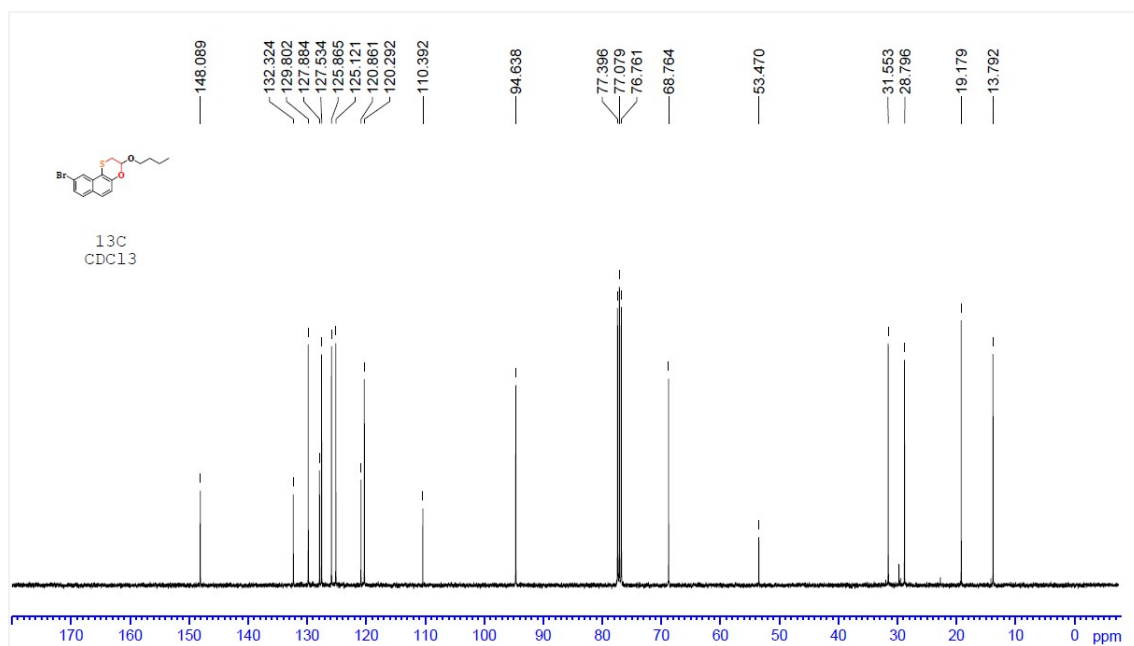

Figure S50. <sup>13</sup>C NMR (100 MHz, CDCl<sub>3</sub>) Spectrum of Compound 5d

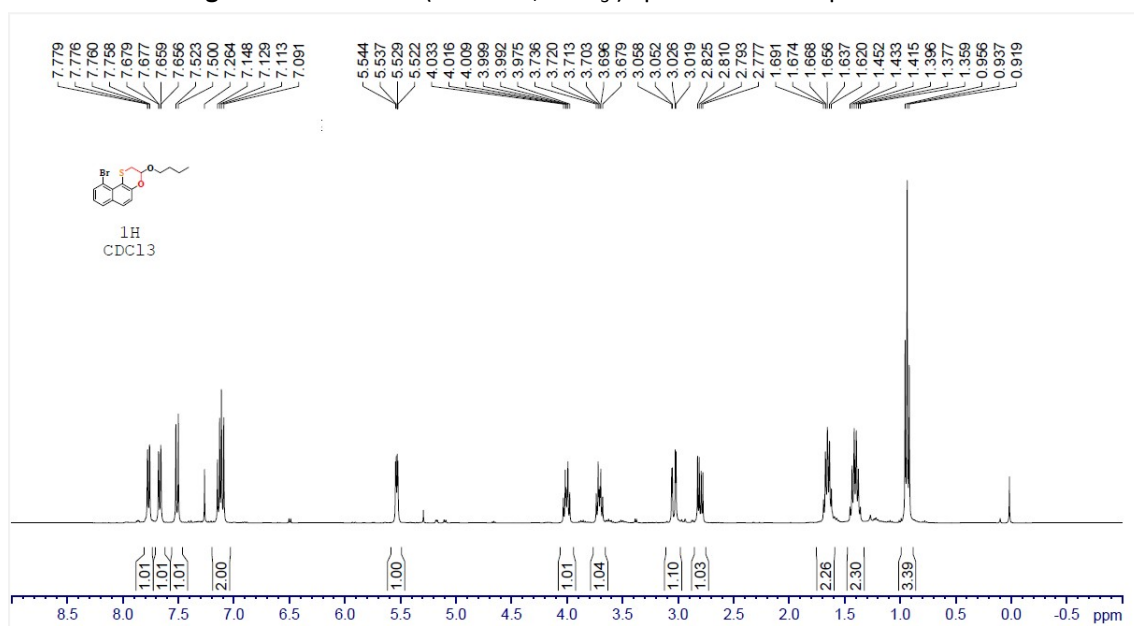

Figure S51. <sup>1</sup>H NMR (400 MHz, CDCl<sub>3</sub>) Spectrum of Compound 5e

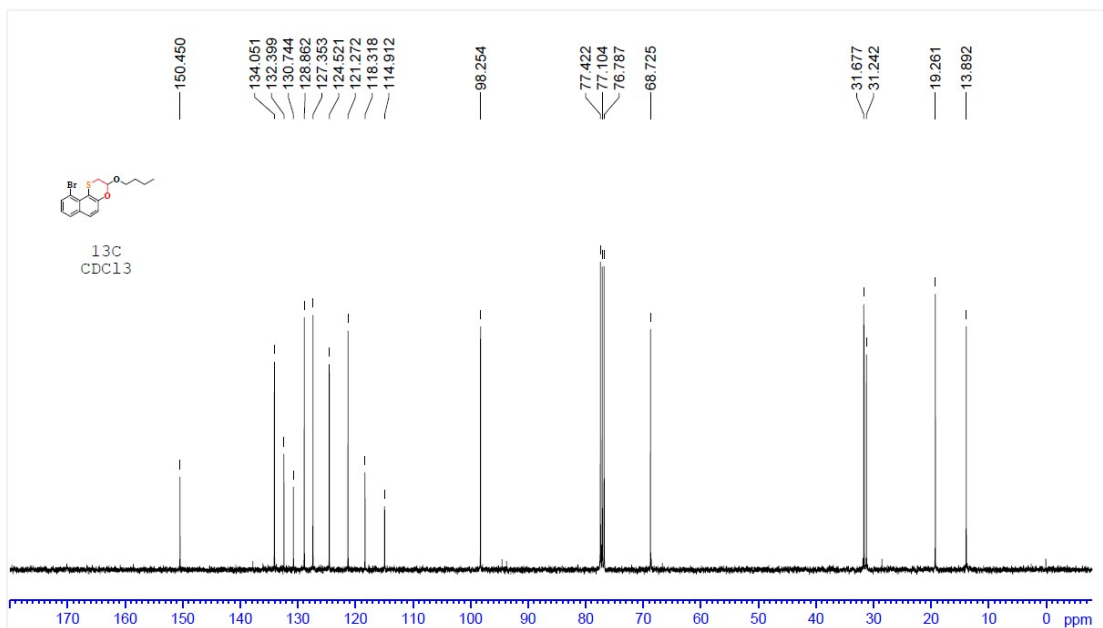

Figure S52. <sup>13</sup>C NMR (100 MHz, CDCl<sub>3</sub>) Spectrum of Compound 5e

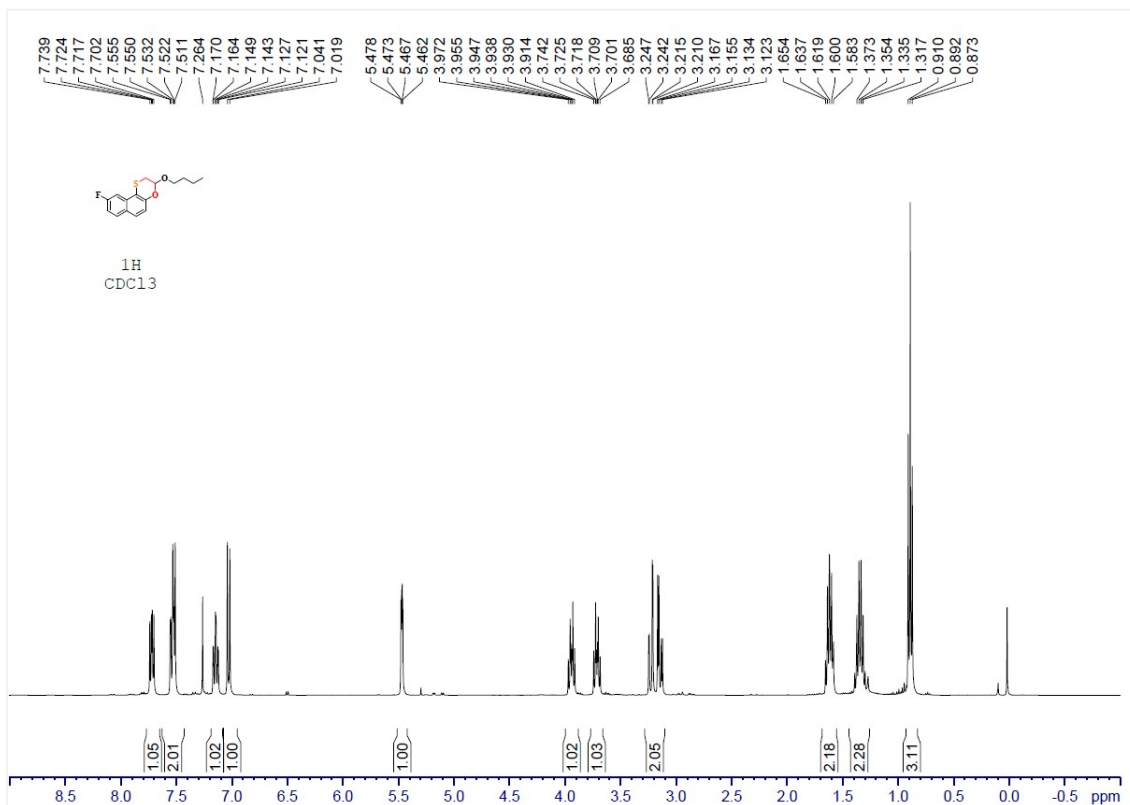

Figure S53. <sup>1</sup>H NMR (400 MHz, CDCl<sub>3</sub>) Spectrum of Compound 5f

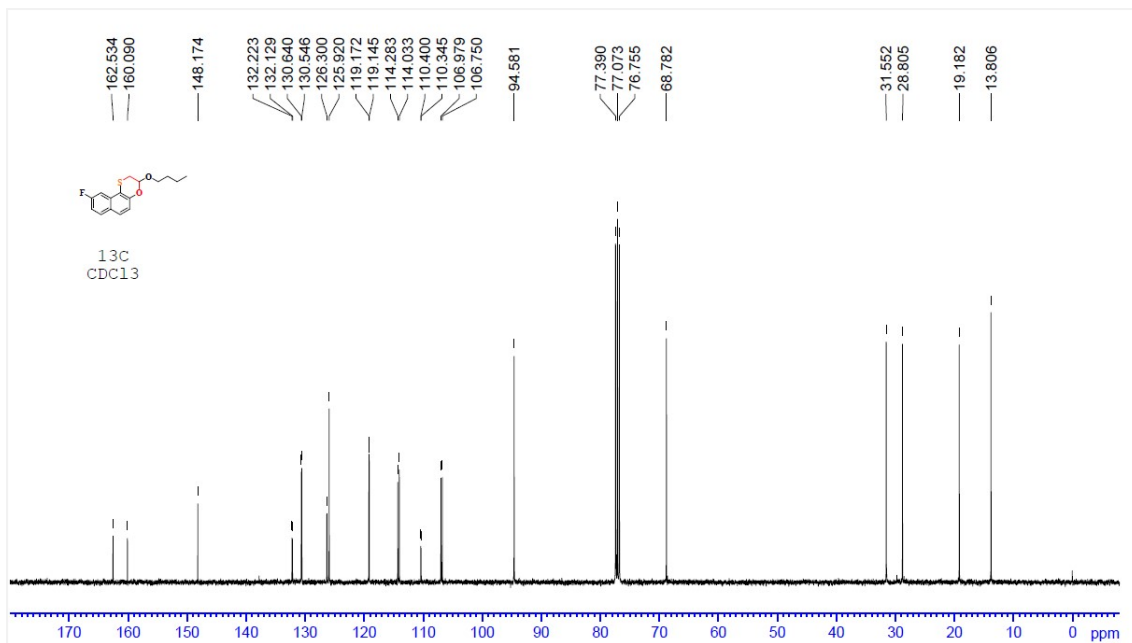

**Figure S54.  $^{13}\text{C}$  NMR (100 MHz,  $\text{CDCl}_3$ ) Spectrum of Compound 5f**

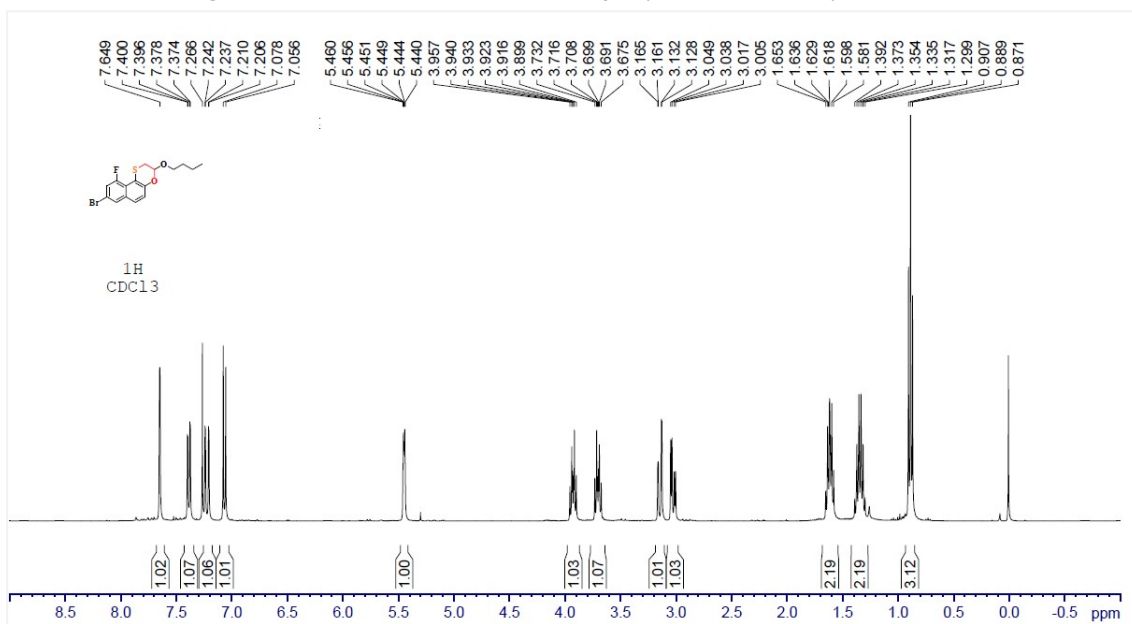

**Figure S55.  $^1\text{H}$  NMR (400 MHz,  $\text{CDCl}_3$ ) Spectrum of Compound 5g**



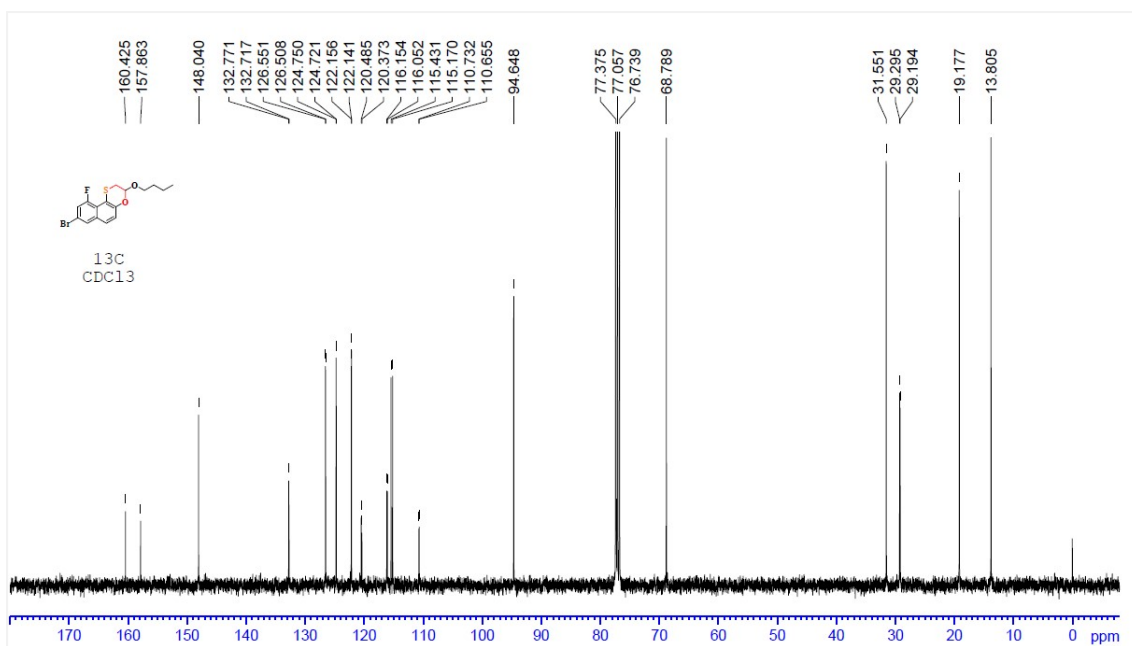

Figure S56. <sup>13</sup>C NMR (100 MHz, CDCl<sub>3</sub>) Spectrum of Compound 5g

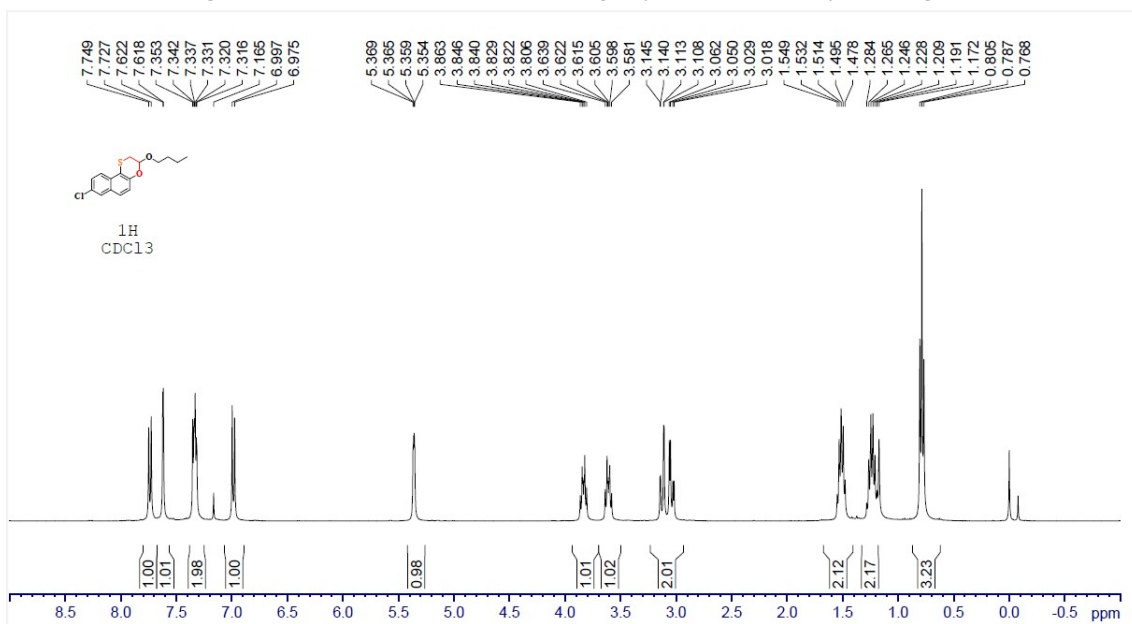

Figure S57. <sup>1</sup>H NMR (400 MHz, CDCl<sub>3</sub>) Spectrum of Compound 5h

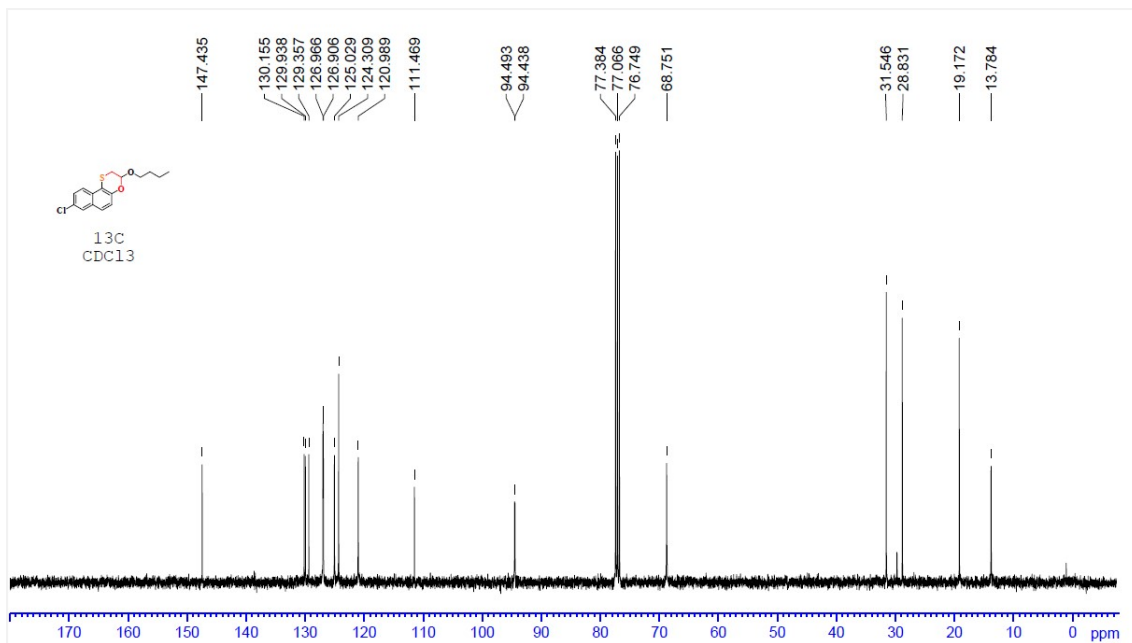

Figure S58. <sup>13</sup>C NMR (100 MHz, CDCl<sub>3</sub>) Spectrum of Compound 5h

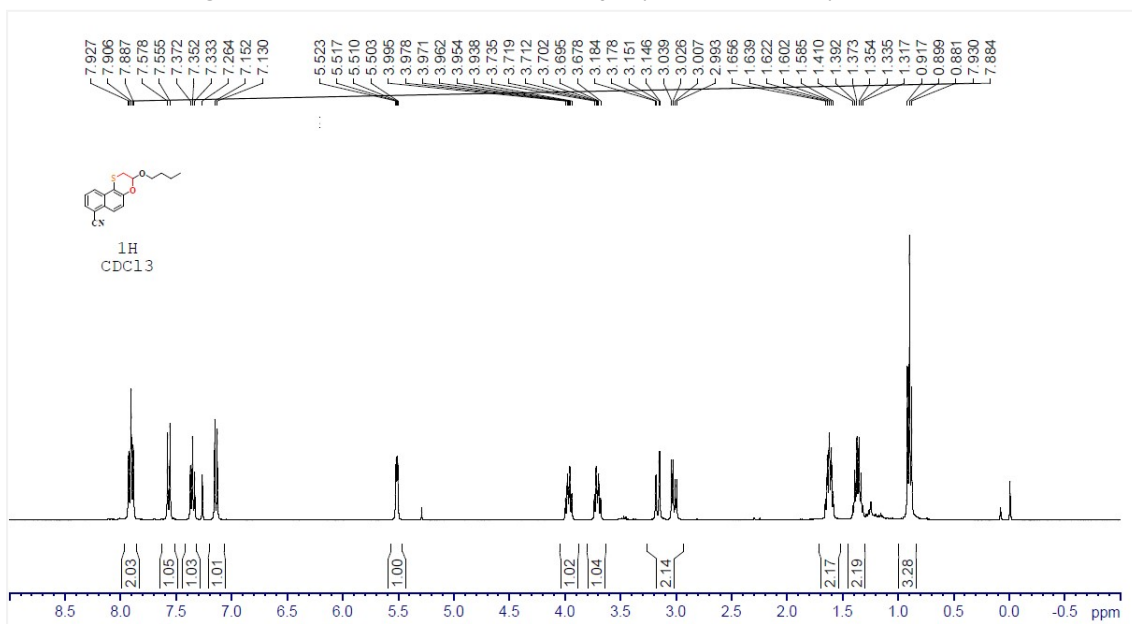

Figure S59. <sup>1</sup>H NMR (400 MHz, CDCl<sub>3</sub>) Spectrum of Compound 5i

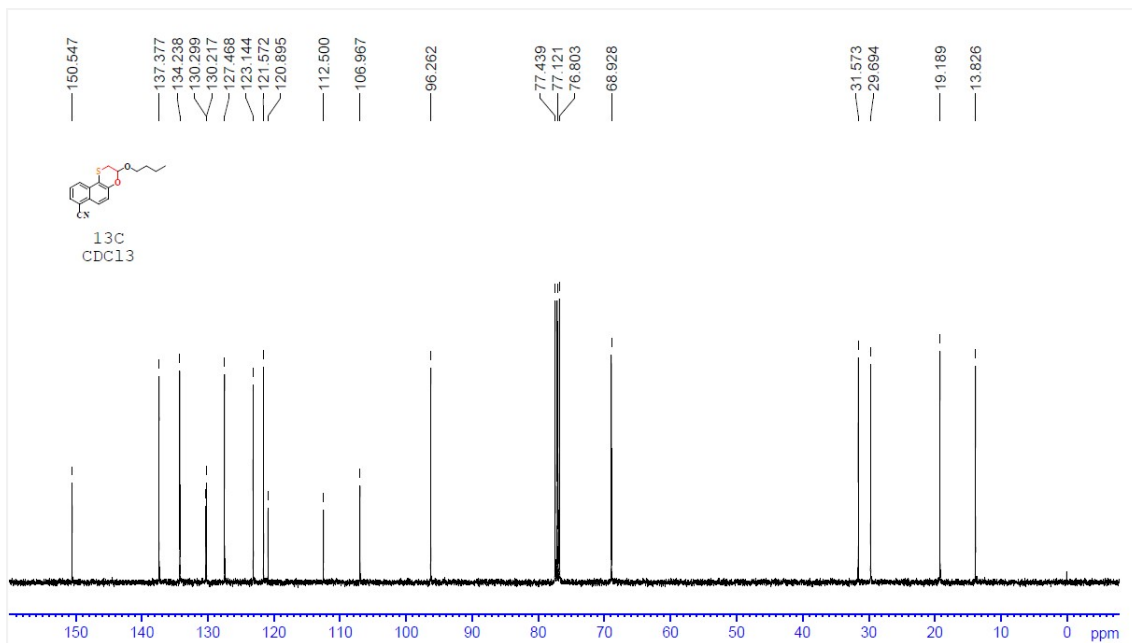

Figure S60. <sup>13</sup>C NMR (100 MHz, CDCl<sub>3</sub>) Spectrum of Compound 5i

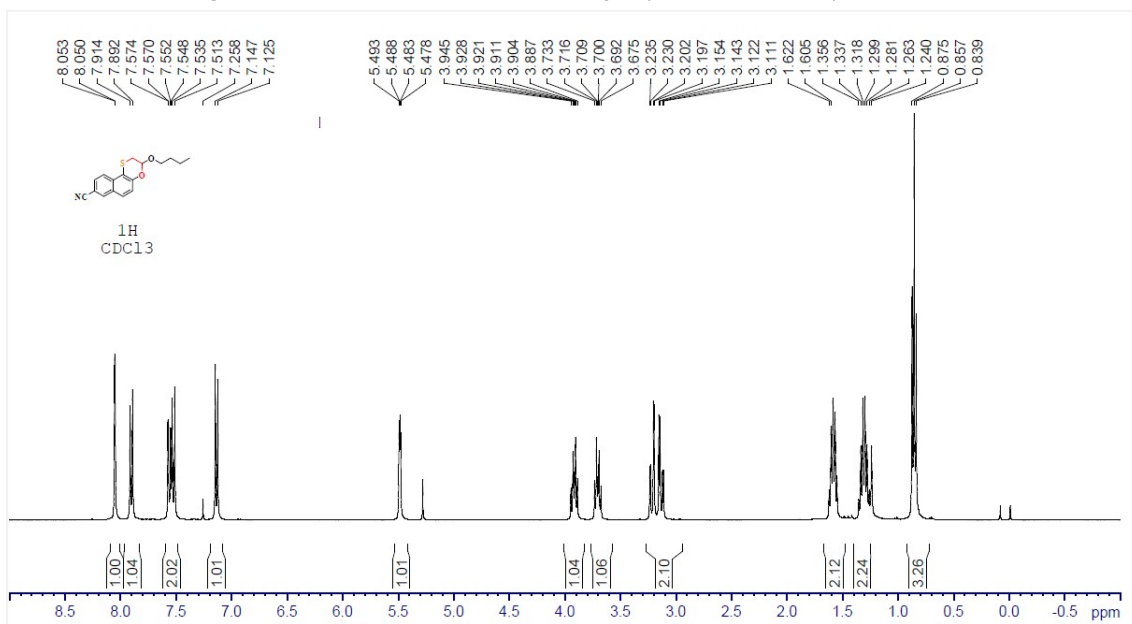

Figure S61. <sup>1</sup>H NMR (400 MHz, CDCl<sub>3</sub>) Spectrum of Compound 5j

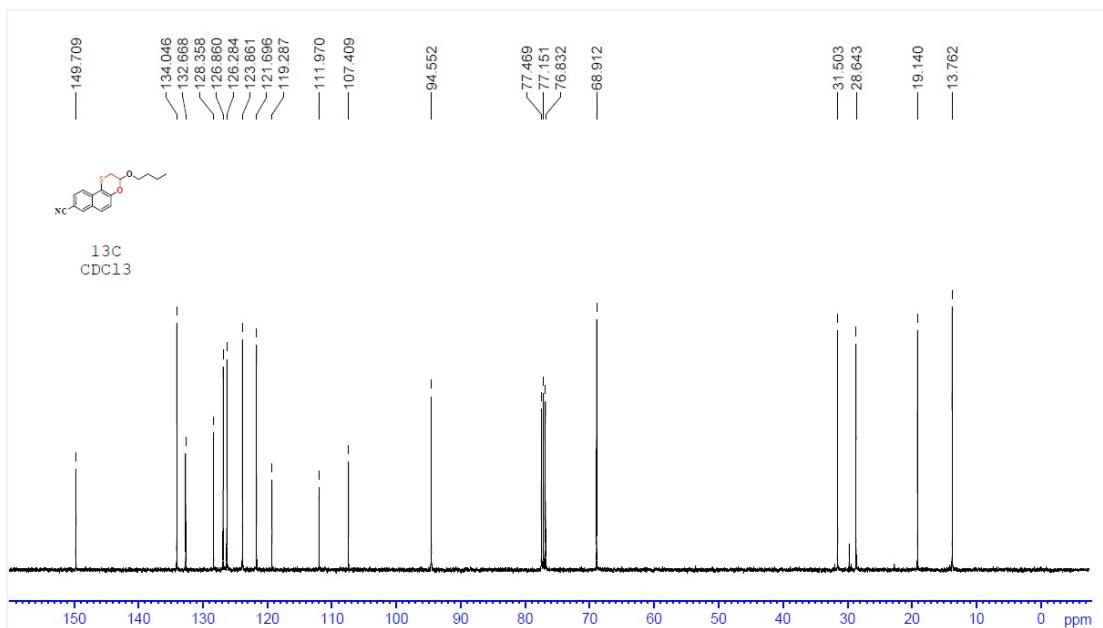

**Figure S62.** <sup>13</sup>C NMR (100 MHz, CDCl<sub>3</sub>) Spectrum of Compound 5j

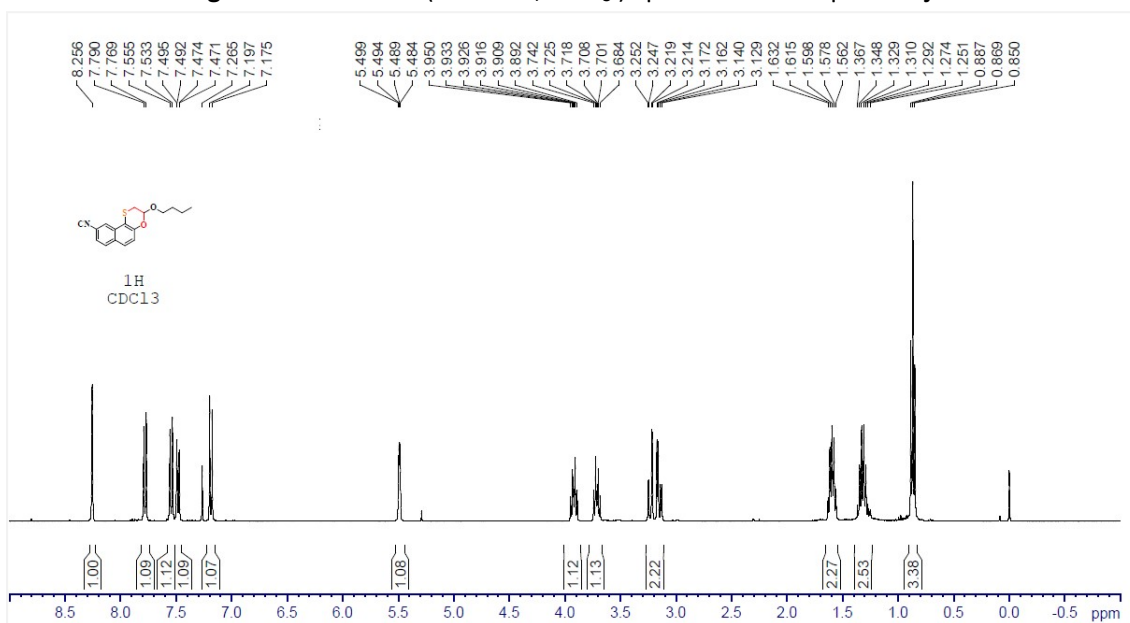

**Figure S63.** <sup>1</sup>H NMR (400 MHz, CDCl<sub>3</sub>) Spectrum of Compound 5k

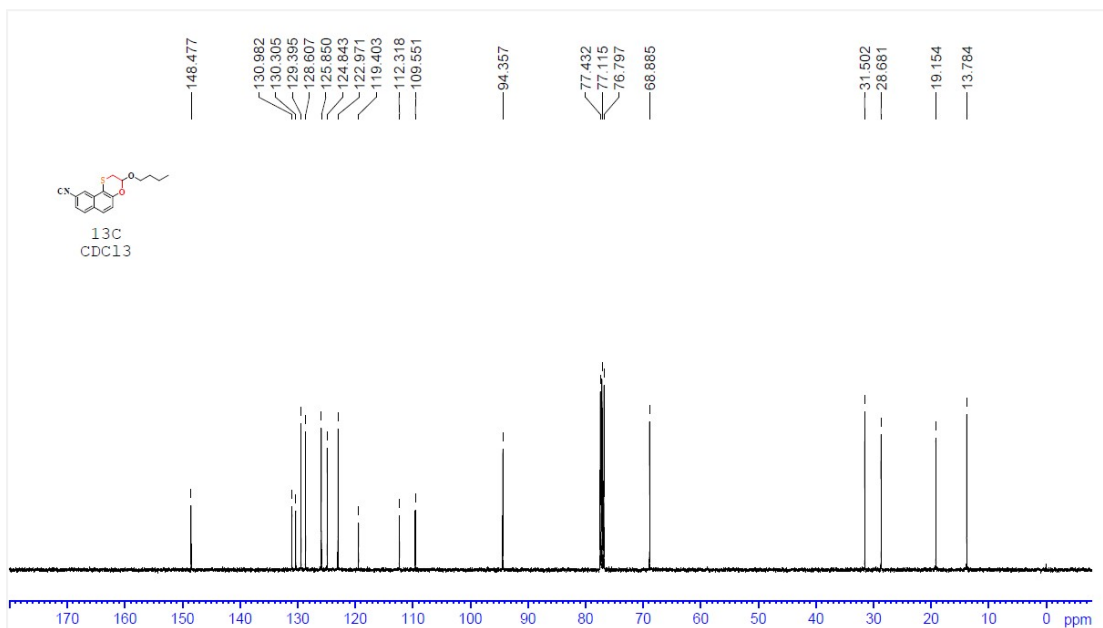

Figure S64. <sup>13</sup>C NMR (100 MHz, CDCl<sub>3</sub>) Spectrum of Compound 5k

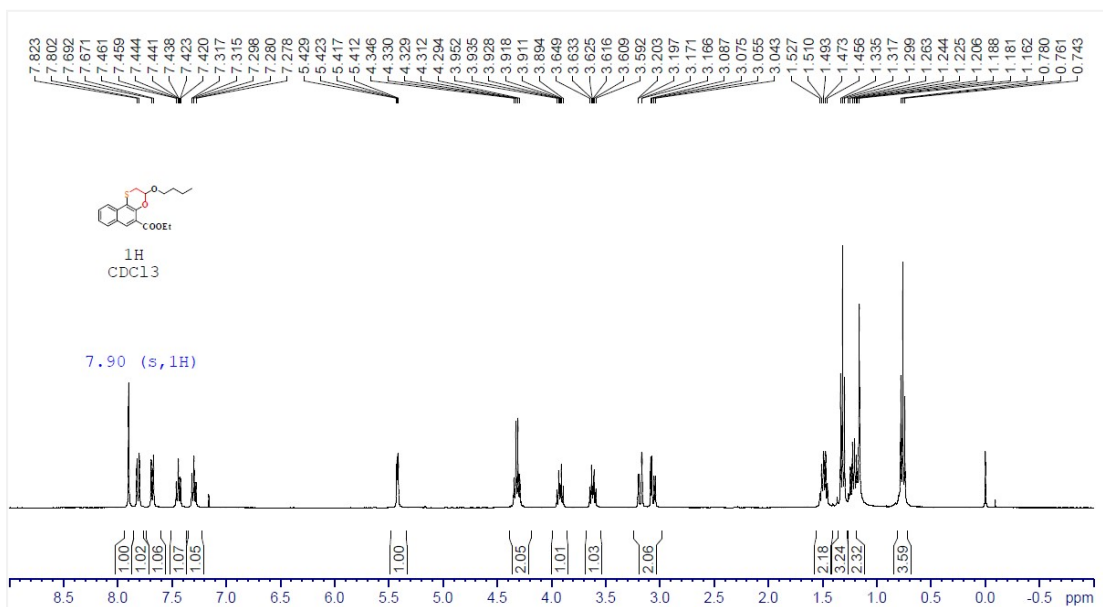

Figure S65. <sup>1</sup>H NMR (400 MHz, CDCl<sub>3</sub>) Spectrum of Compound 5l

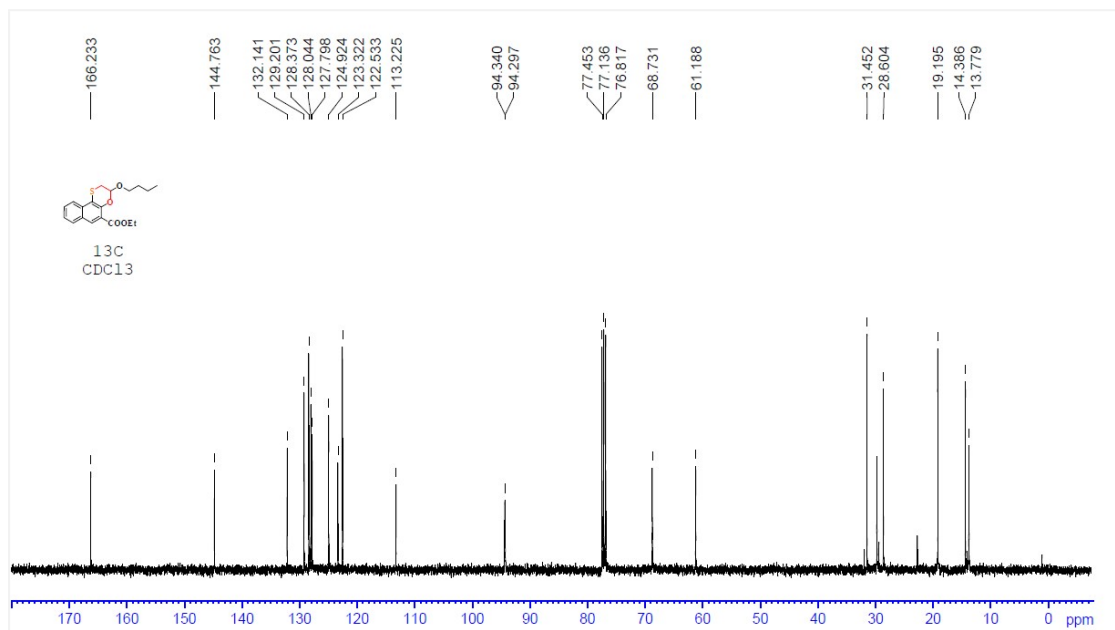

Figure S66. <sup>13</sup>C NMR (100 MHz, CDCl<sub>3</sub>) Spectrum of Compound 51

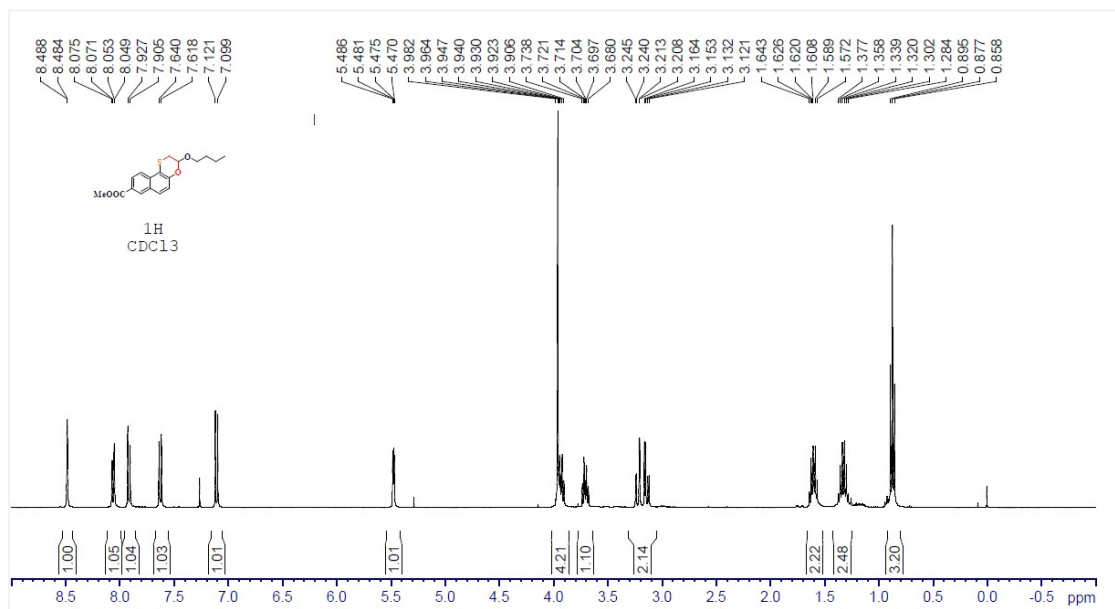

Figure S67. <sup>1</sup>H NMR (400 MHz, CDCl<sub>3</sub>) Spectrum of Compound 5m

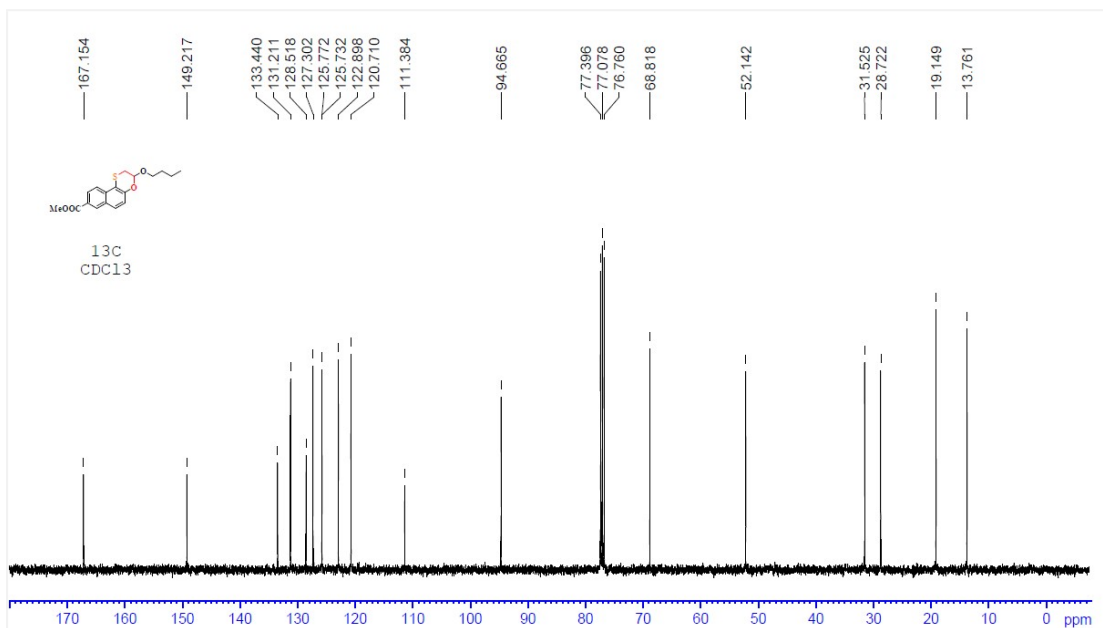

Figure S68. <sup>13</sup>C NMR (100 MHz, CDCl<sub>3</sub>) Spectrum of Compound 5m

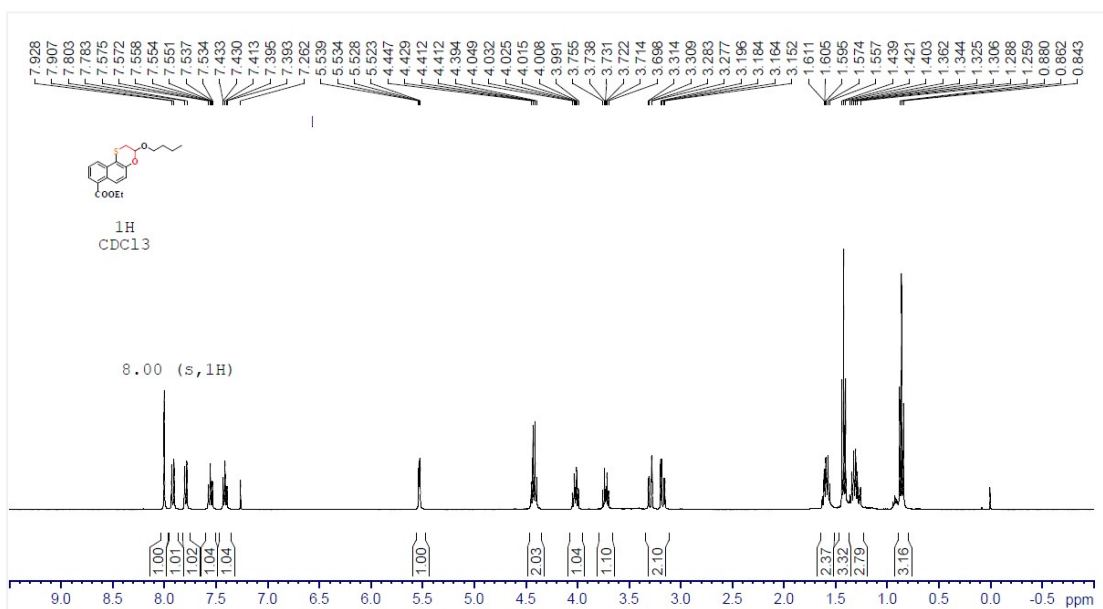

Figure S69. <sup>1</sup>H NMR (400 MHz, CDCl<sub>3</sub>) Spectrum of Compound 5n

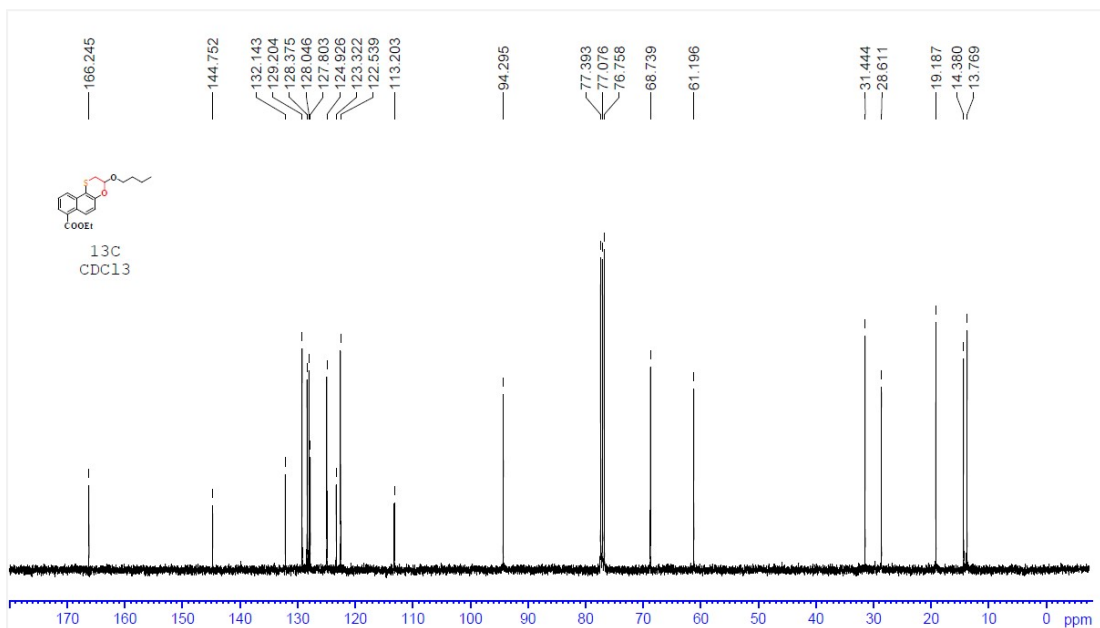

Figure S70. <sup>13</sup>C NMR (100 MHz, CDCl<sub>3</sub>) Spectrum of Compound 5n

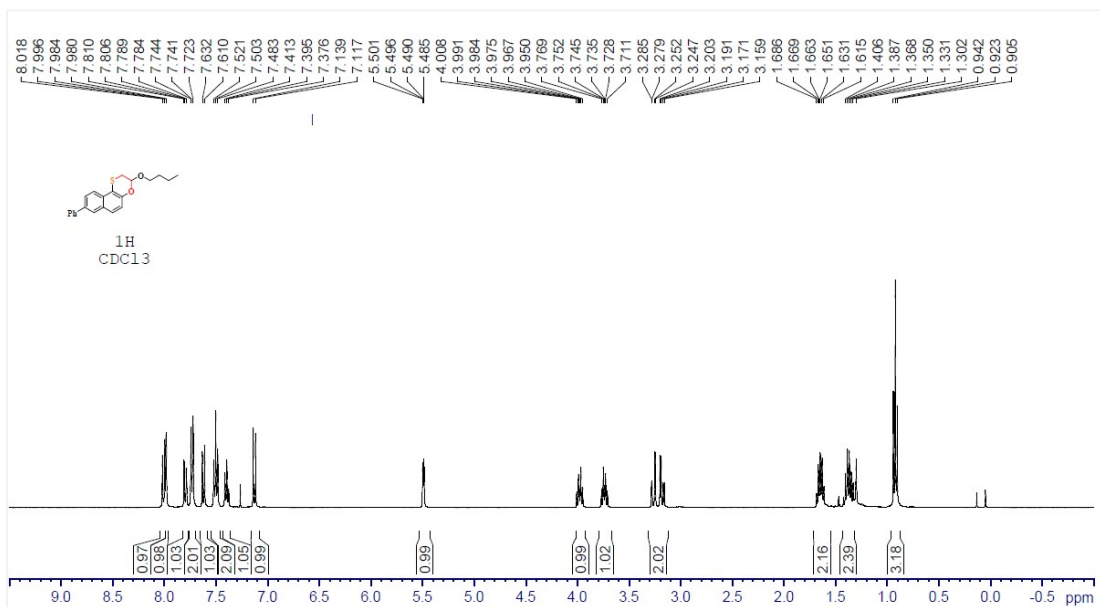

Figure S71. <sup>1</sup>H NMR (400 MHz, CDCl<sub>3</sub>) Spectrum of Compound 5o



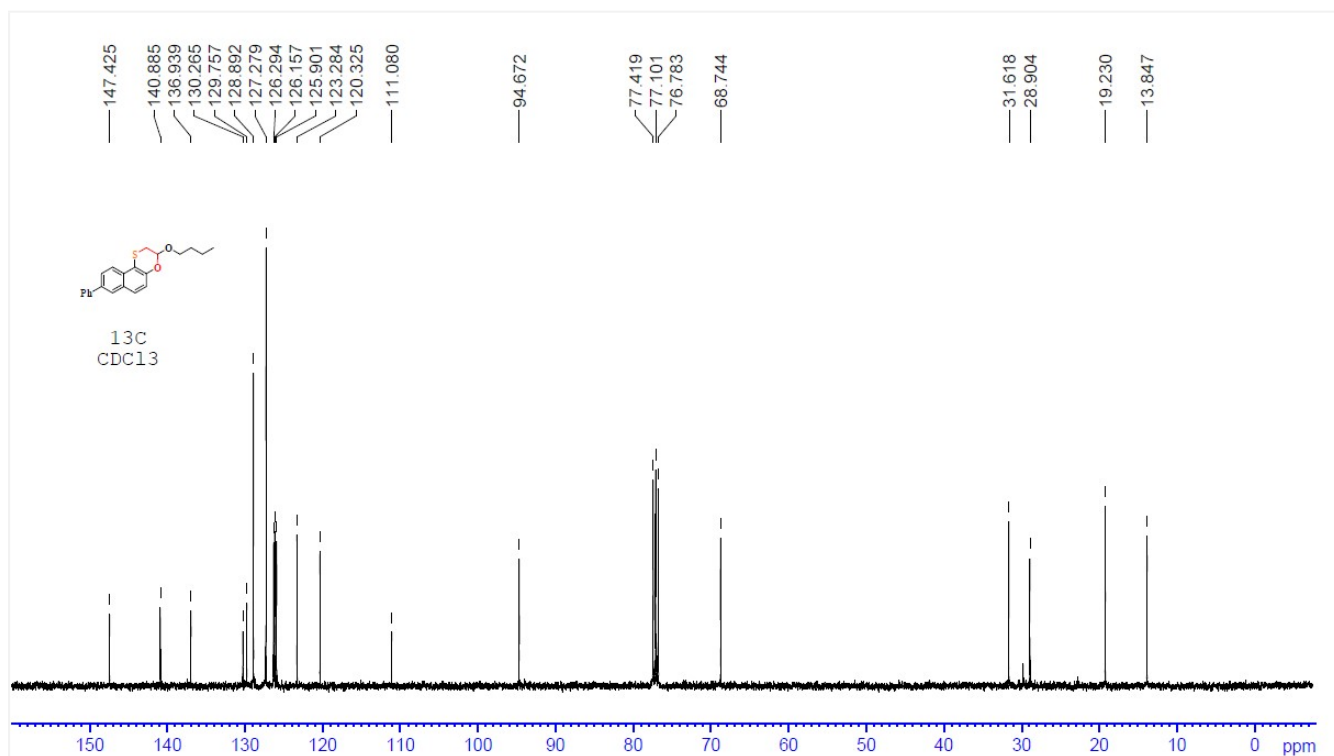

**Figure S72.** <sup>13</sup>C NMR (100 MHz, CDCl<sub>3</sub>) Spectrum of Compound 5o

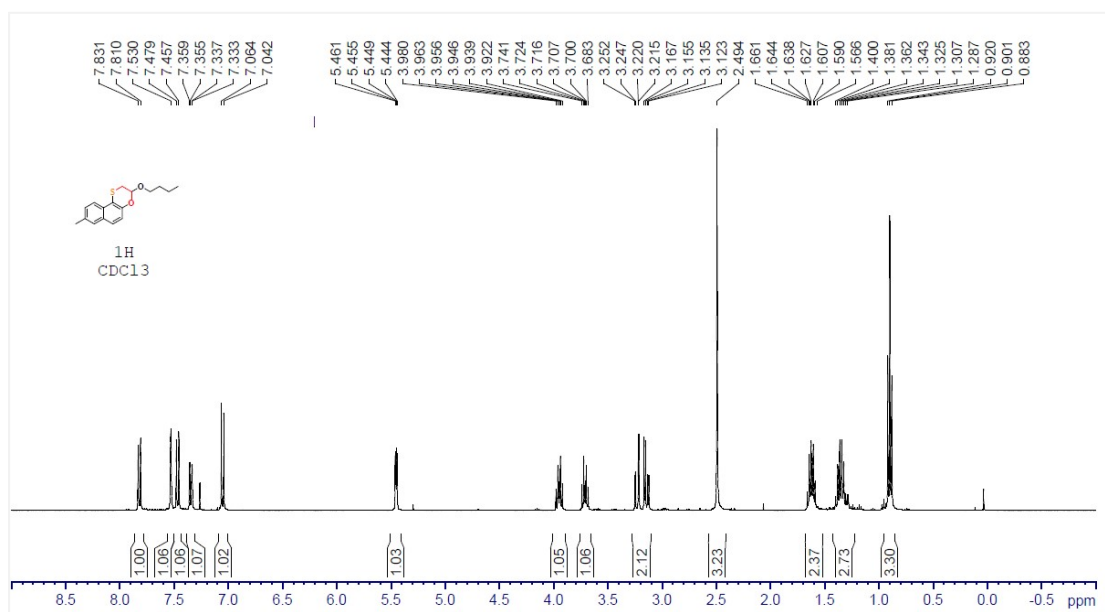

**Figure S73.** <sup>1</sup>H NMR (400 MHz, CDCl<sub>3</sub>) Spectrum of Compound 5p

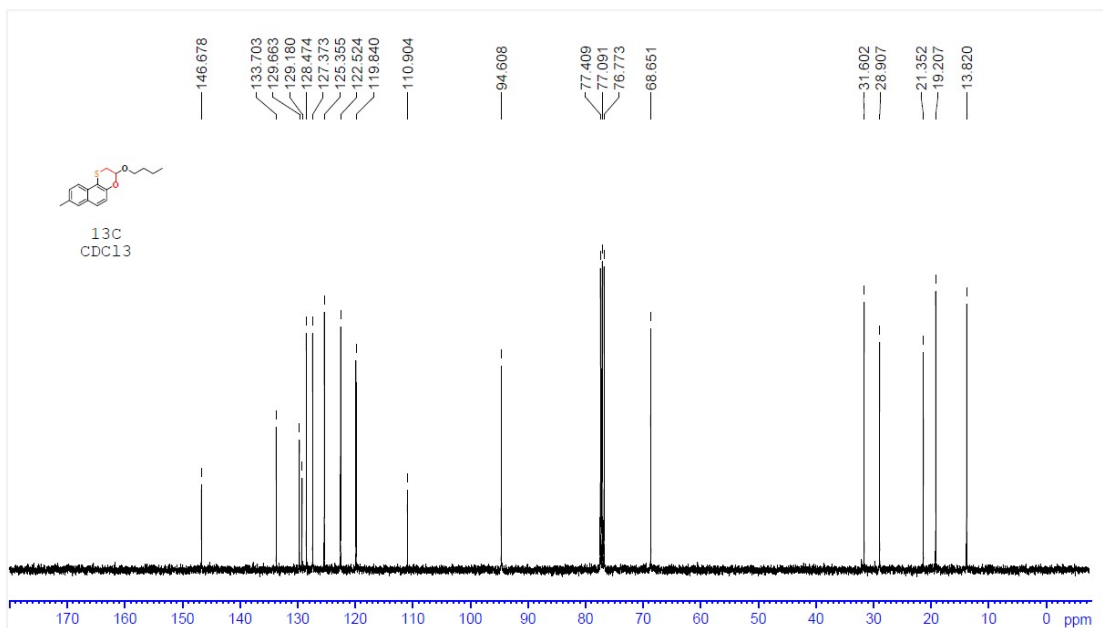

Figure S74. <sup>13</sup>C NMR (100 MHz, CDCl<sub>3</sub>) Spectrum of Compound 5p

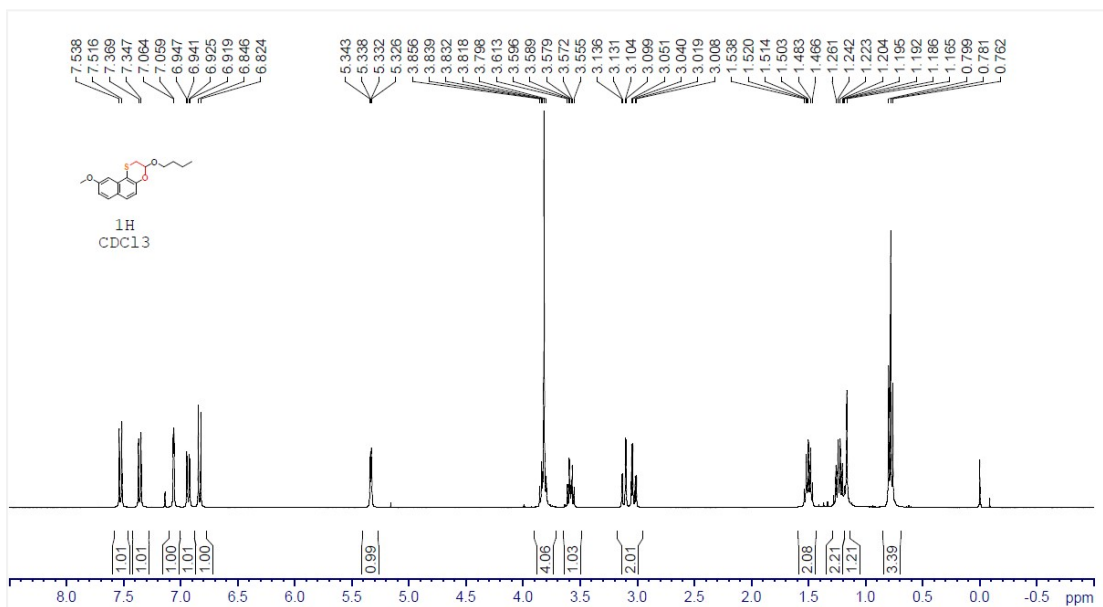

Figure S75. <sup>1</sup>H NMR (400 MHz, CDCl<sub>3</sub>) Spectrum of Compound 5q

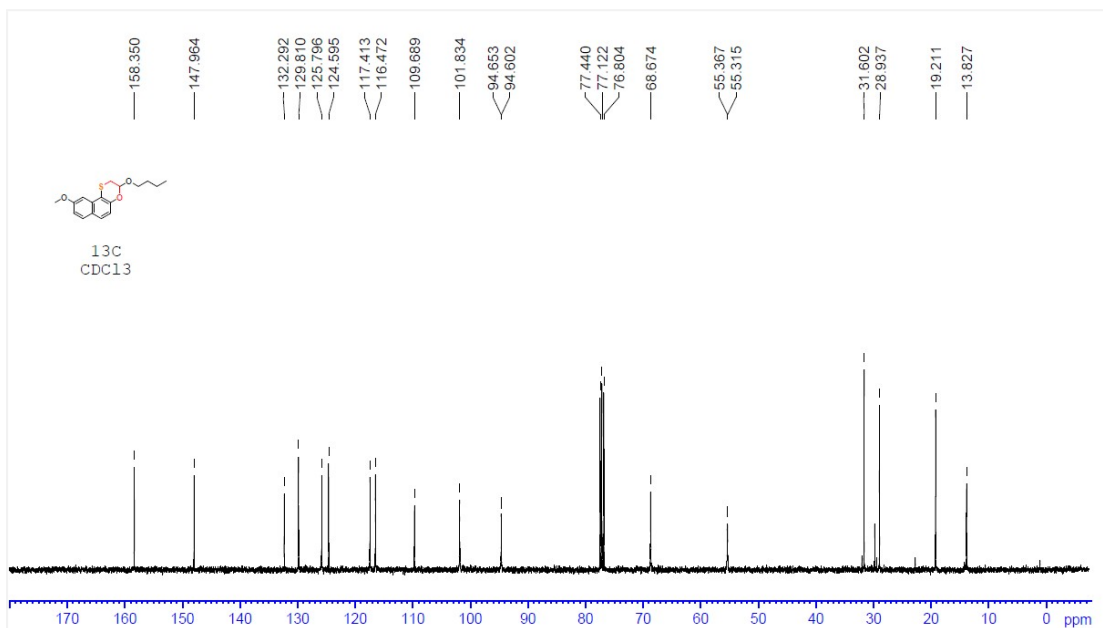

**Figure S76.** <sup>13</sup>C NMR (100 MHz, CDCl<sub>3</sub>) Spectrum of Compound 5q

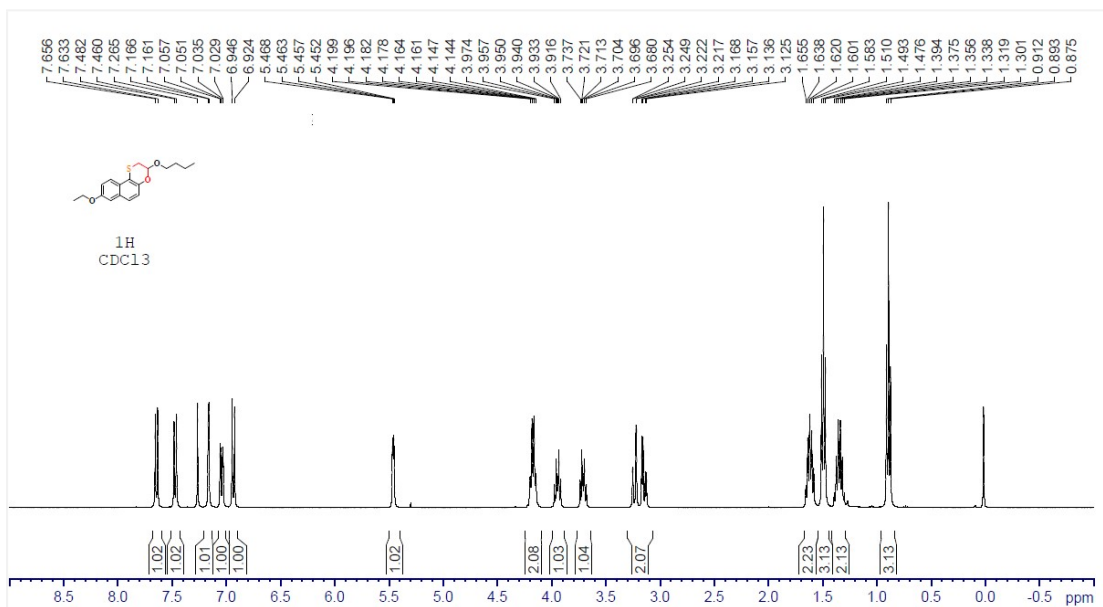

**Figure S77.** <sup>1</sup>H NMR (400 MHz, CDCl<sub>3</sub>) Spectrum of Compound 5r

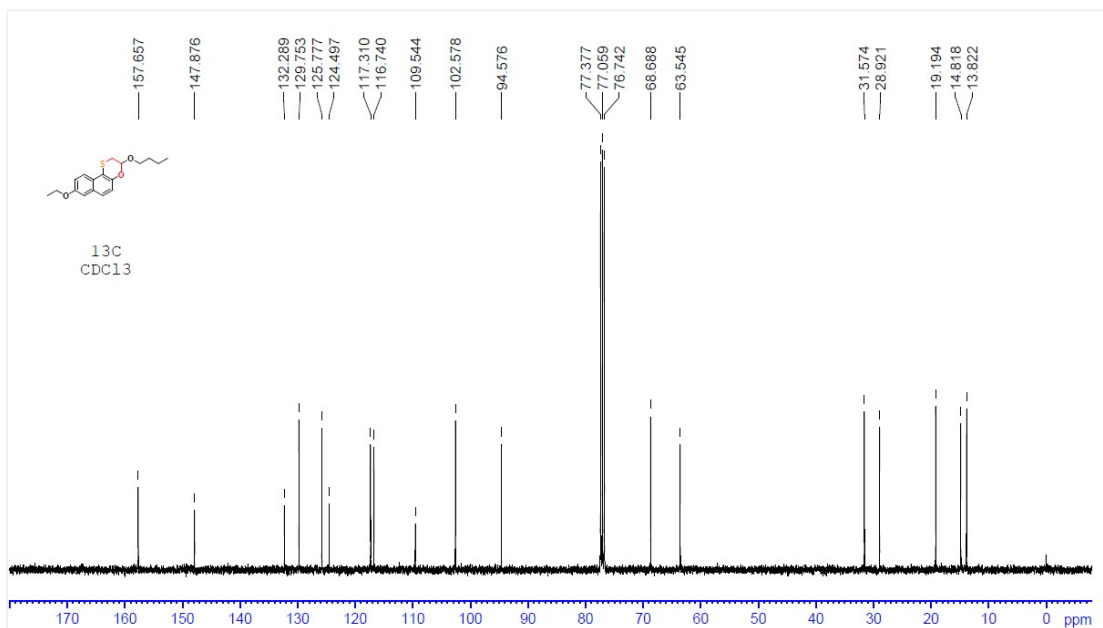

**Figure S78.** <sup>13</sup>C NMR (100 MHz, CDCl<sub>3</sub>) Spectrum of Compound 5r

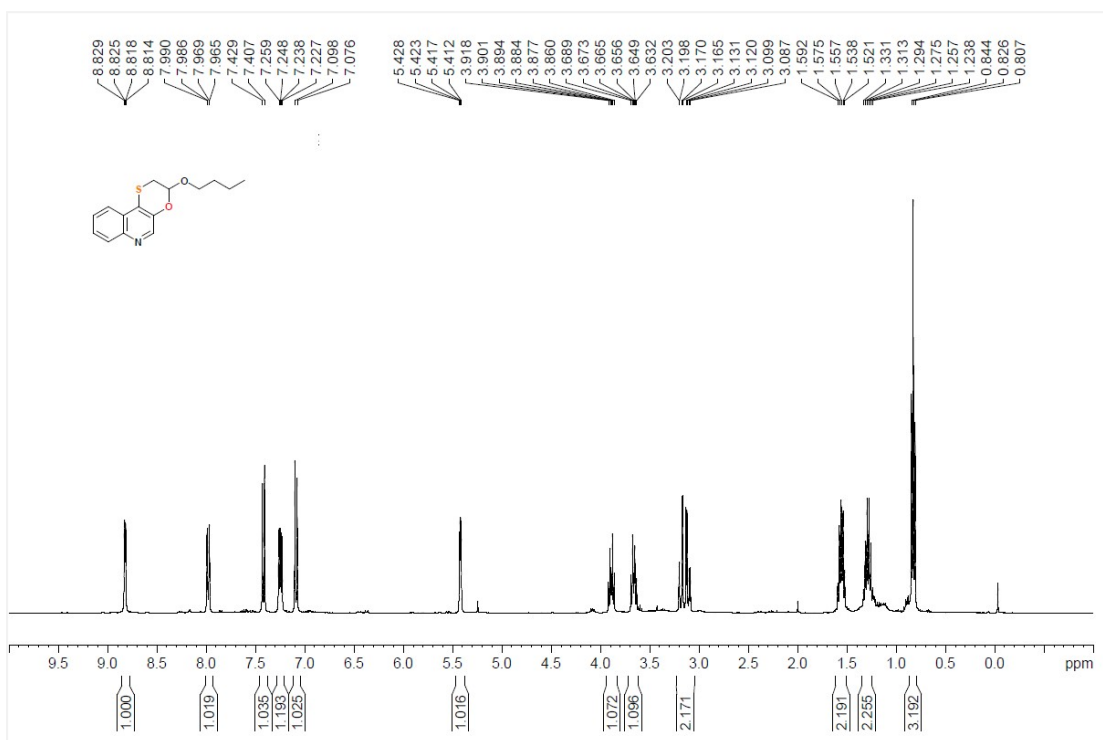

**Figure S79.** <sup>1</sup>H NMR (400 MHz, CDCl<sub>3</sub>) Spectrum of Compound 5s

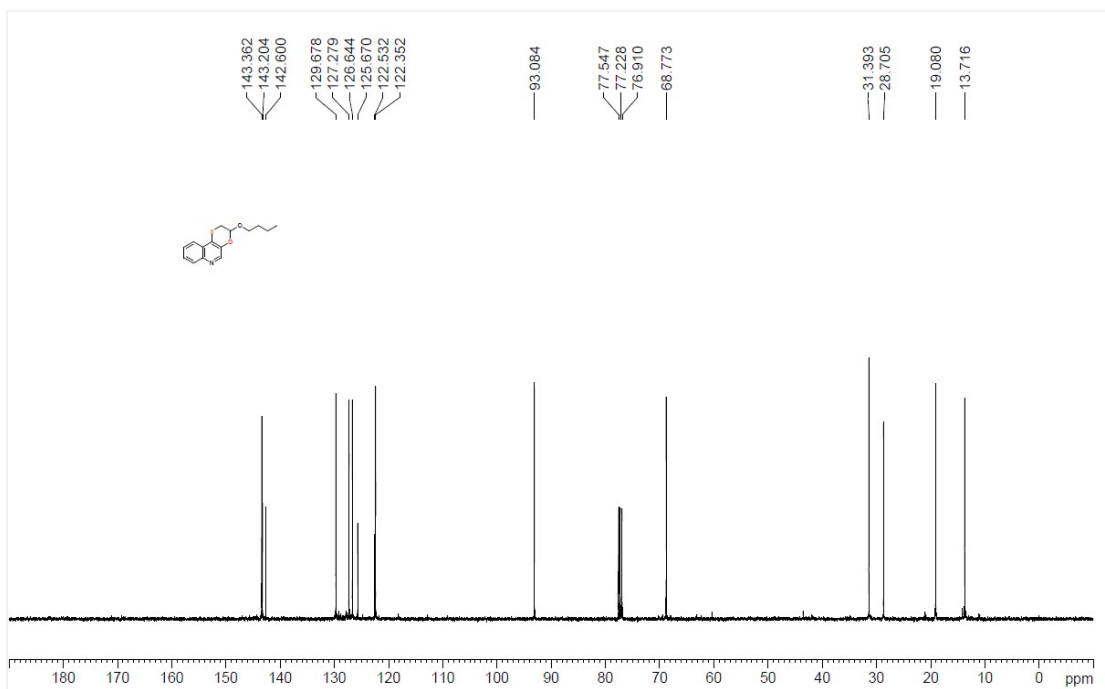

Figure S80. <sup>13</sup>C NMR (100 MHz, CDCl<sub>3</sub>) Spectrum of Compound 5t

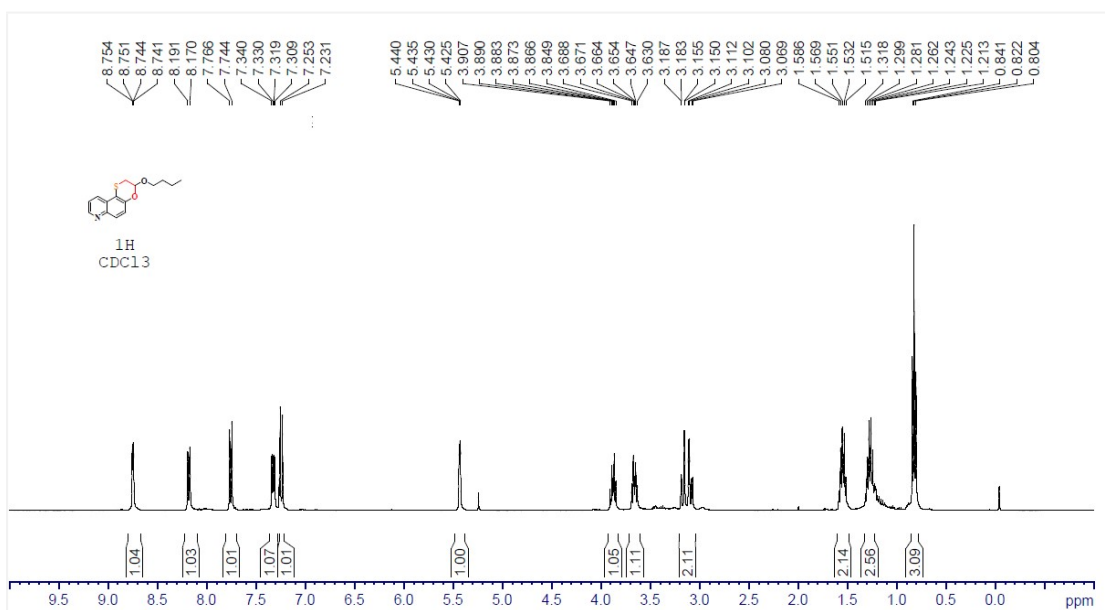

Figure S81. <sup>1</sup>H NMR (400 MHz, CDCl<sub>3</sub>) Spectrum of Compound 5t

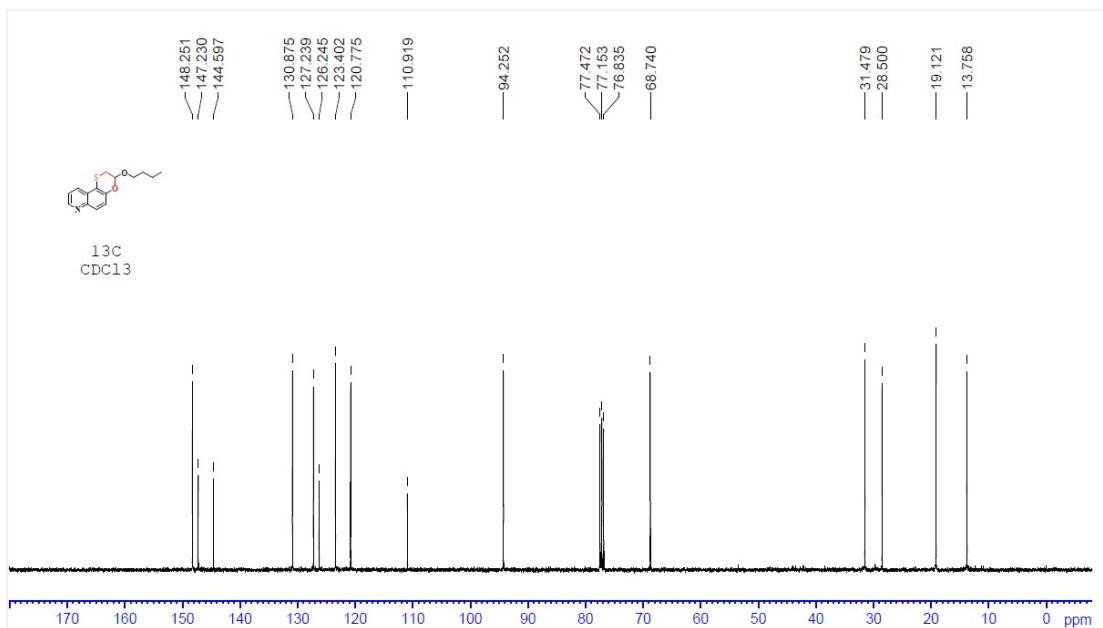

Figure S82. <sup>13</sup>C NMR (100 MHz, CDCl<sub>3</sub>) Spectrum of Compound 5t

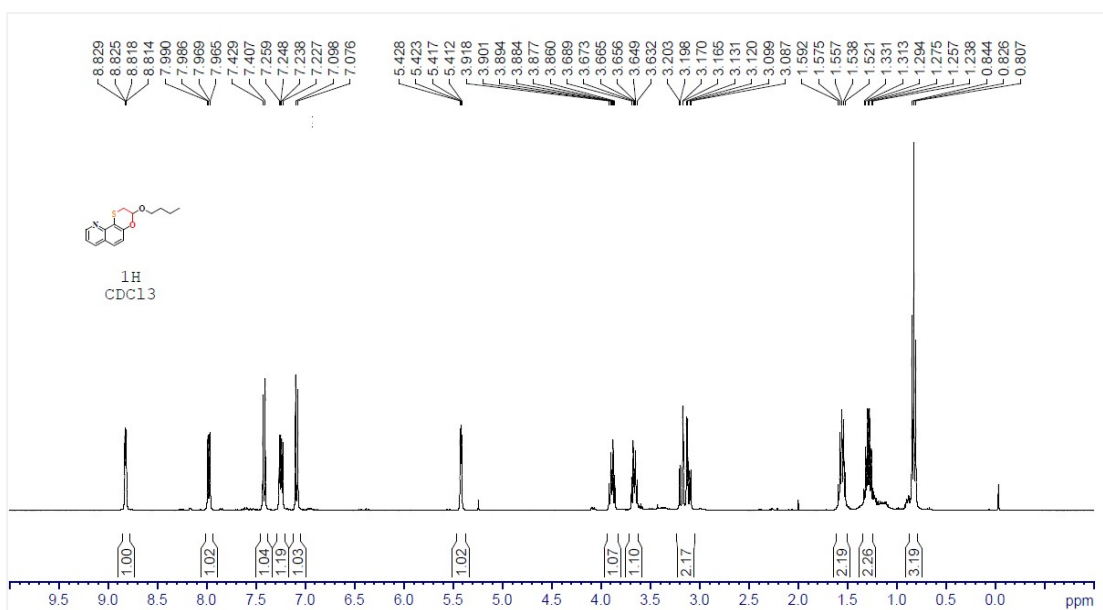

Figure S83. <sup>1</sup>H NMR (400 MHz, CDCl<sub>3</sub>) Spectrum of Compound 5u

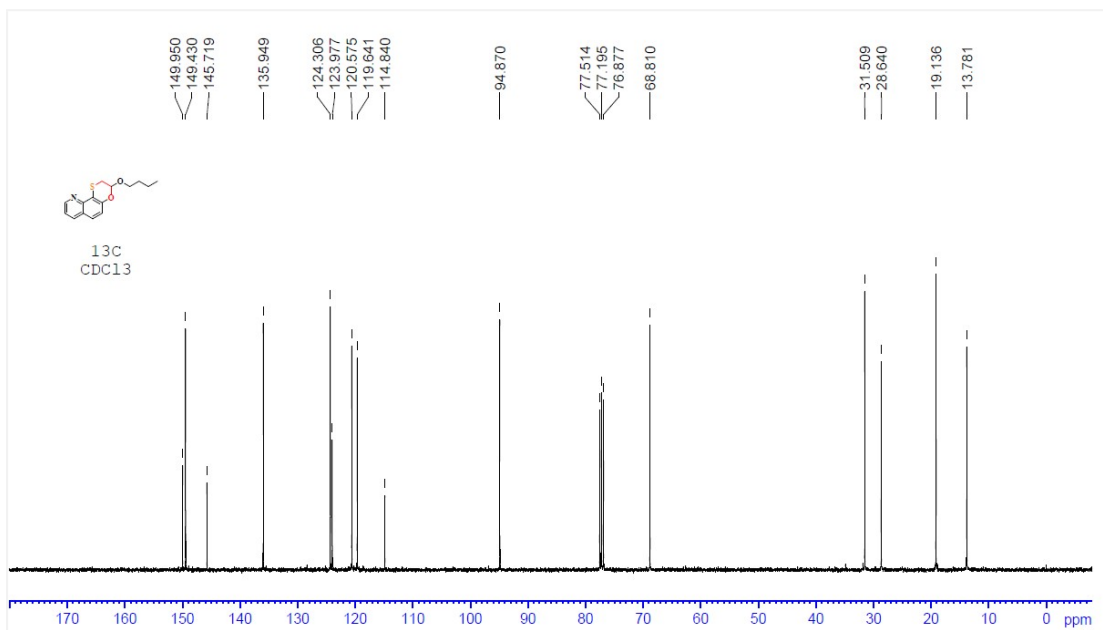

Figure S84. <sup>13</sup>C NMR (100 MHz, CDCl<sub>3</sub>) Spectrum of Compound 5v

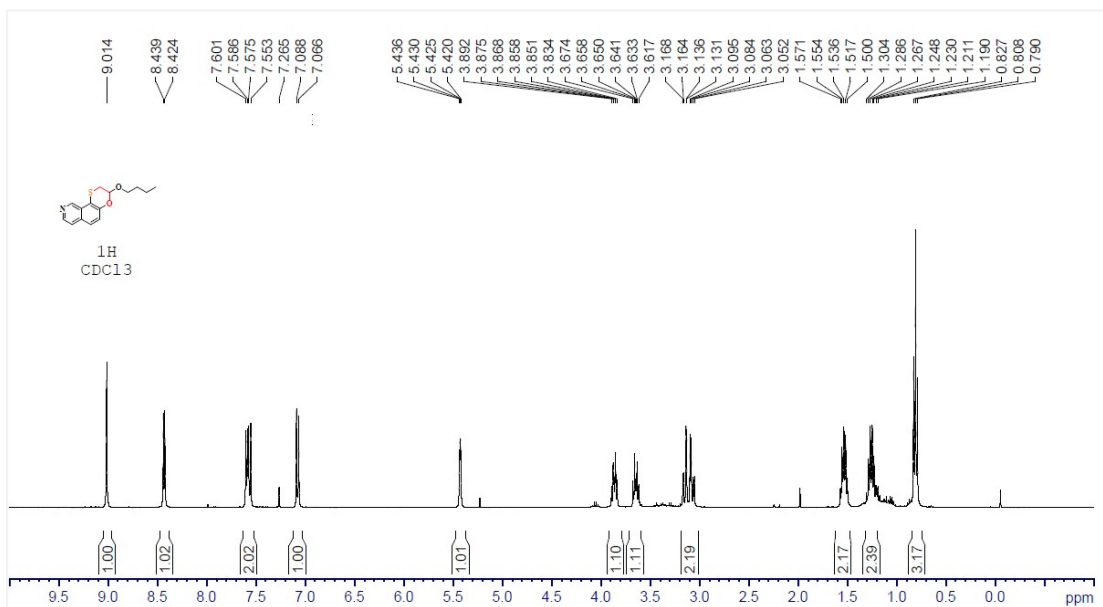

Figure S85. <sup>1</sup>H NMR (400 MHz, CDCl<sub>3</sub>) Spectrum of Compound 5v

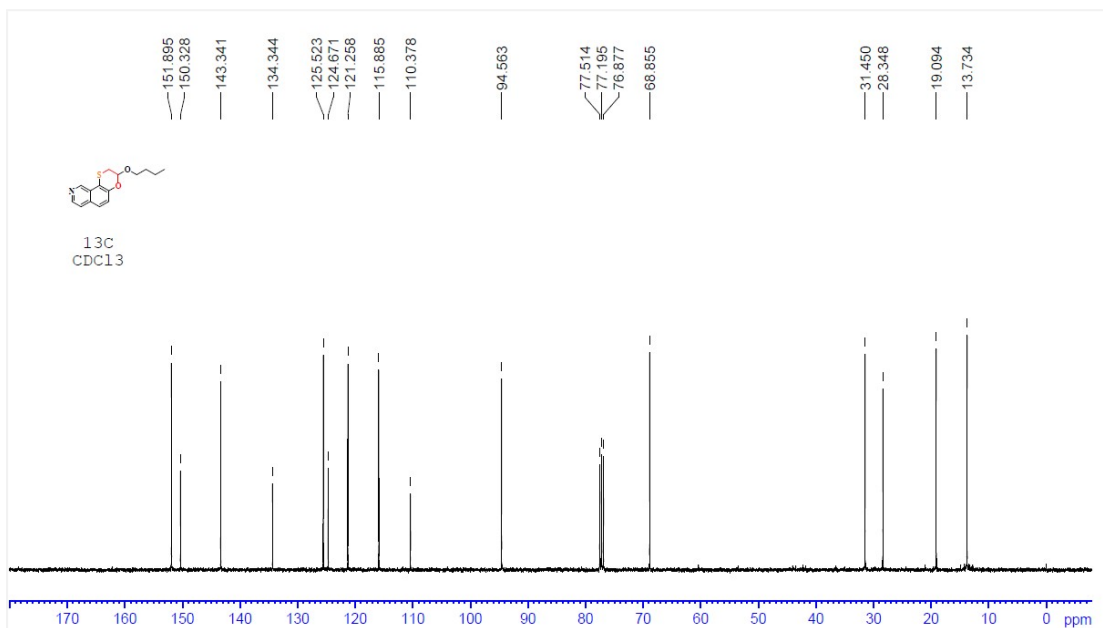

Figure S86. <sup>13</sup>C NMR (100 MHz, CDCl<sub>3</sub>) Spectrum of Compound 5v

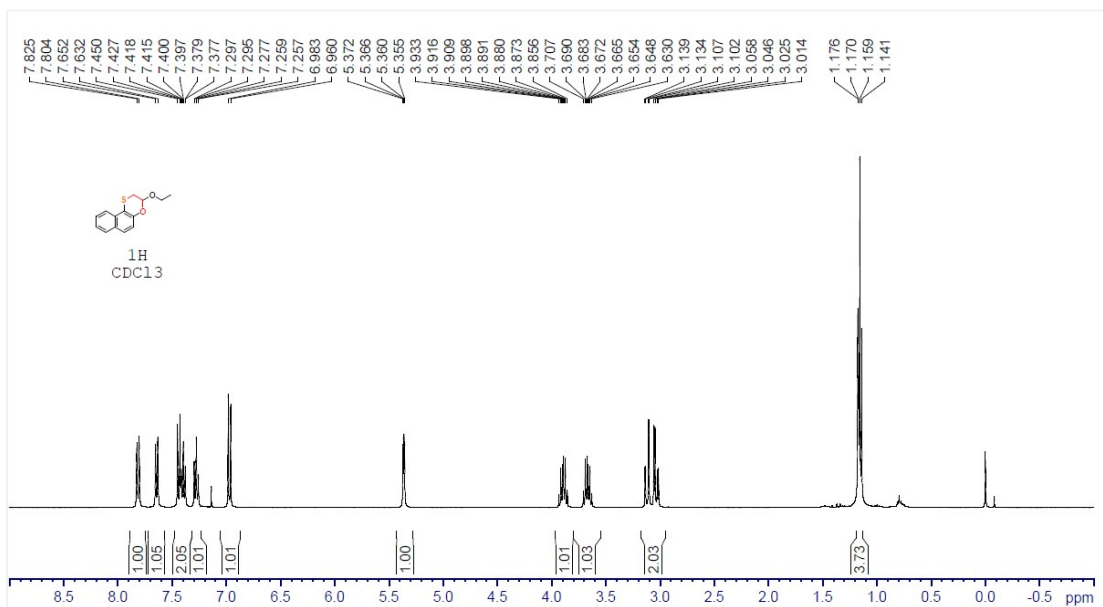

Figure S87. <sup>1</sup>H NMR (400 MHz, CDCl<sub>3</sub>) Spectrum of Compound 5ab



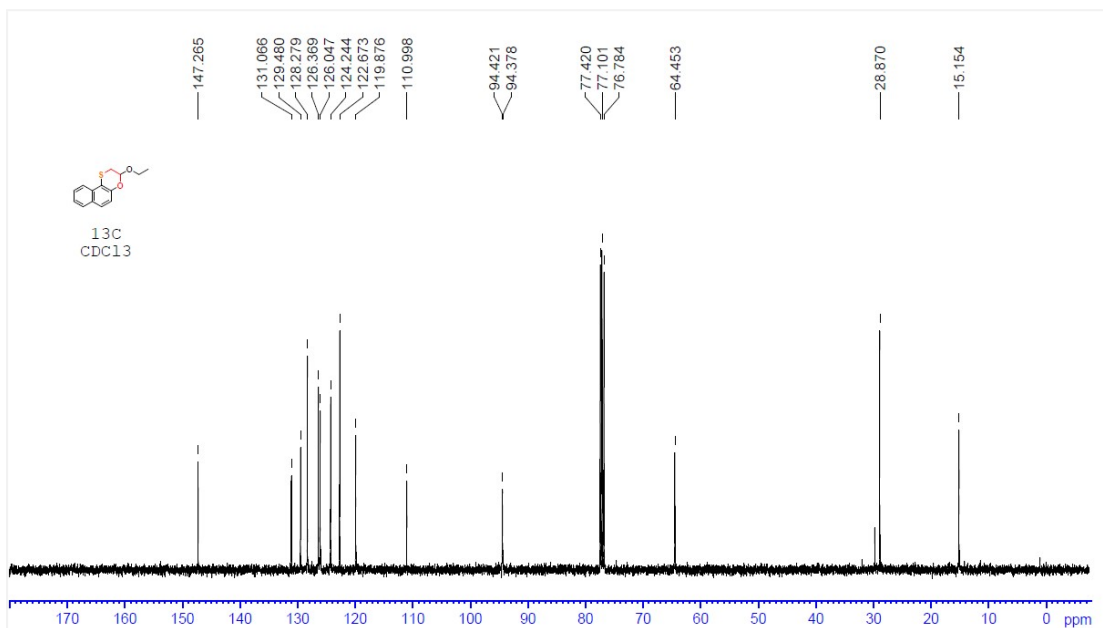

Figure S88. <sup>13</sup>C NMR (100 MHz, CDCl<sub>3</sub>) Spectrum of Compound 5ab

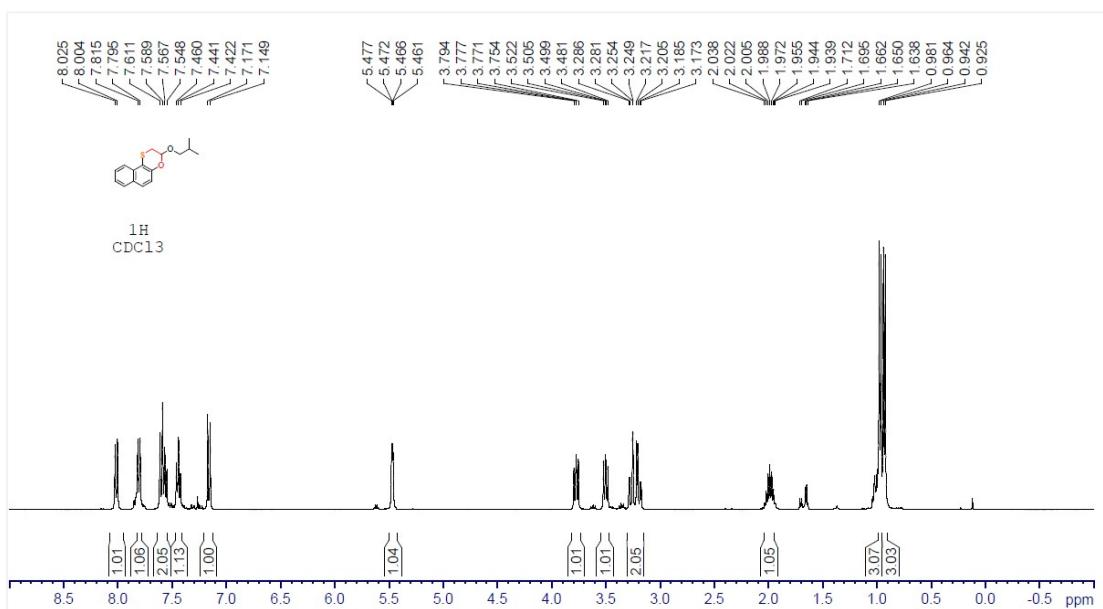

Figure S89. <sup>1</sup>H NMR (400 MHz, CDCl<sub>3</sub>) Spectrum of Compound 5ac

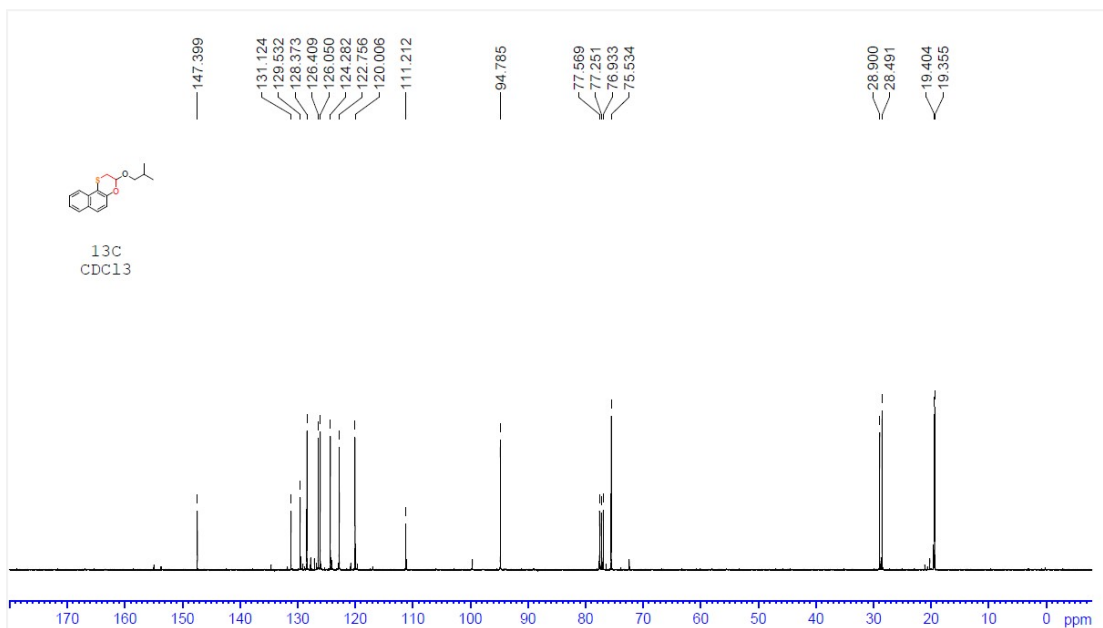

Figure S90. <sup>13</sup>C NMR (100 MHz, CDCl<sub>3</sub>) Spectrum of Compound 5ac

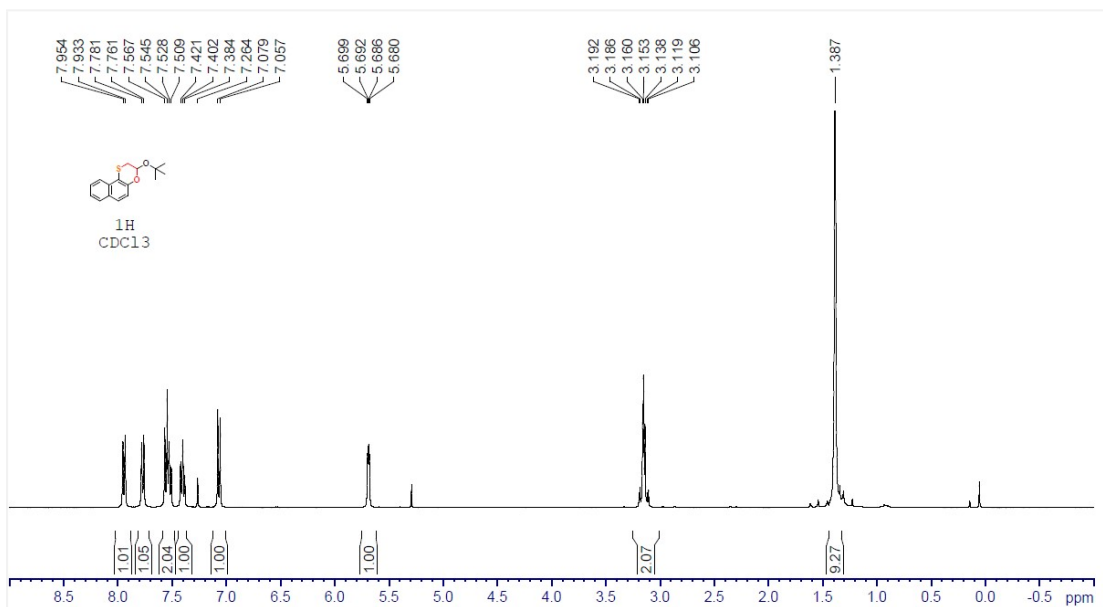

Figure S91. <sup>1</sup>H NMR (400 MHz, CDCl<sub>3</sub>) Spectrum of Compound 5ad

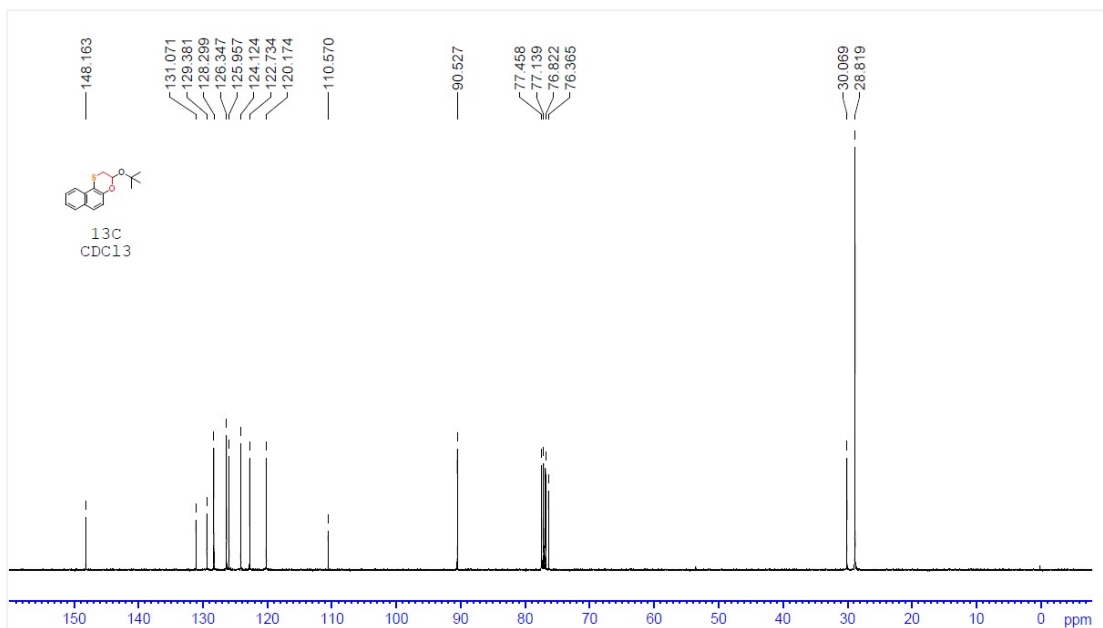

Figure S92. <sup>13</sup>C NMR (100 MHz, CDCl<sub>3</sub>) Spectrum of Compound 5ad

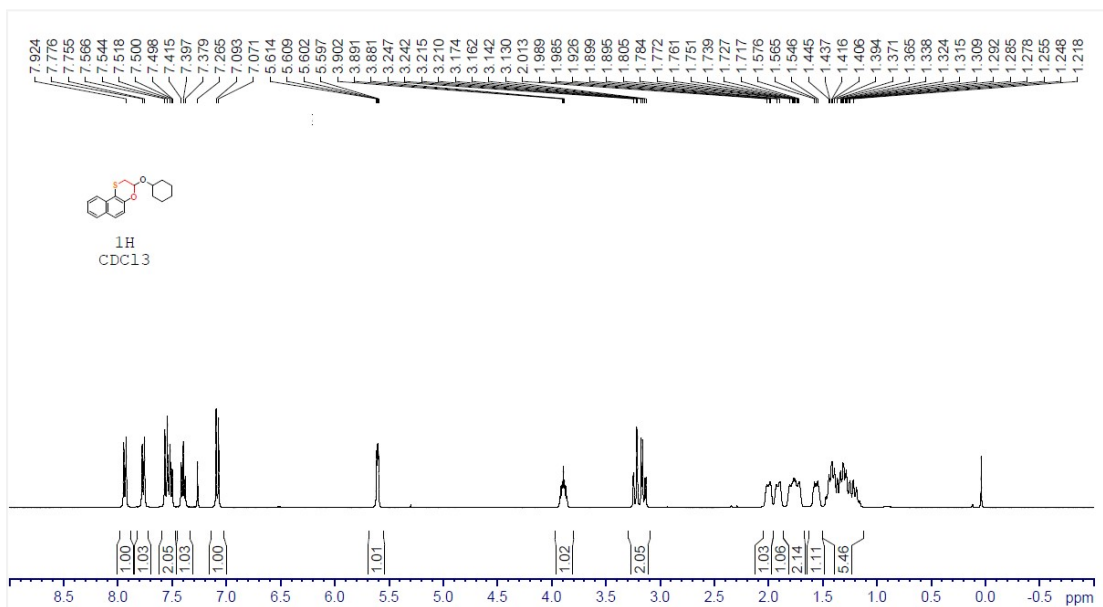

Figure S93. <sup>1</sup>H NMR (400 MHz, CDCl<sub>3</sub>) Spectrum of Compound 5ae

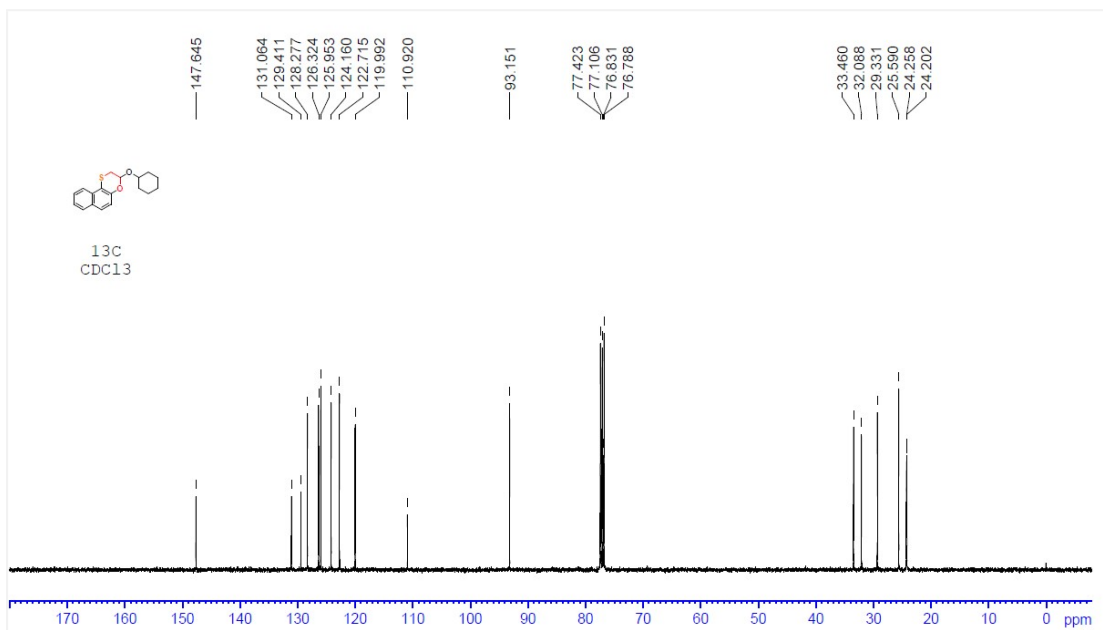

Figure S94. <sup>13</sup>C NMR (100 MHz, CDCl<sub>3</sub>) Spectrum of Compound 5ae

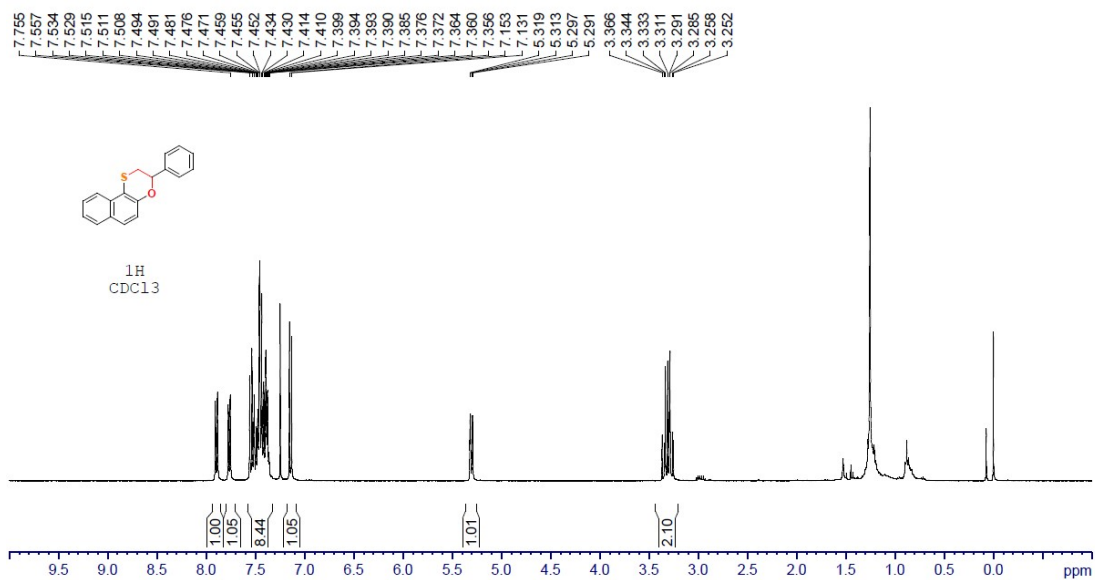

Figure S95. <sup>1</sup>H NMR (400 MHz, CDCl<sub>3</sub>) Spectrum of Compound 5af

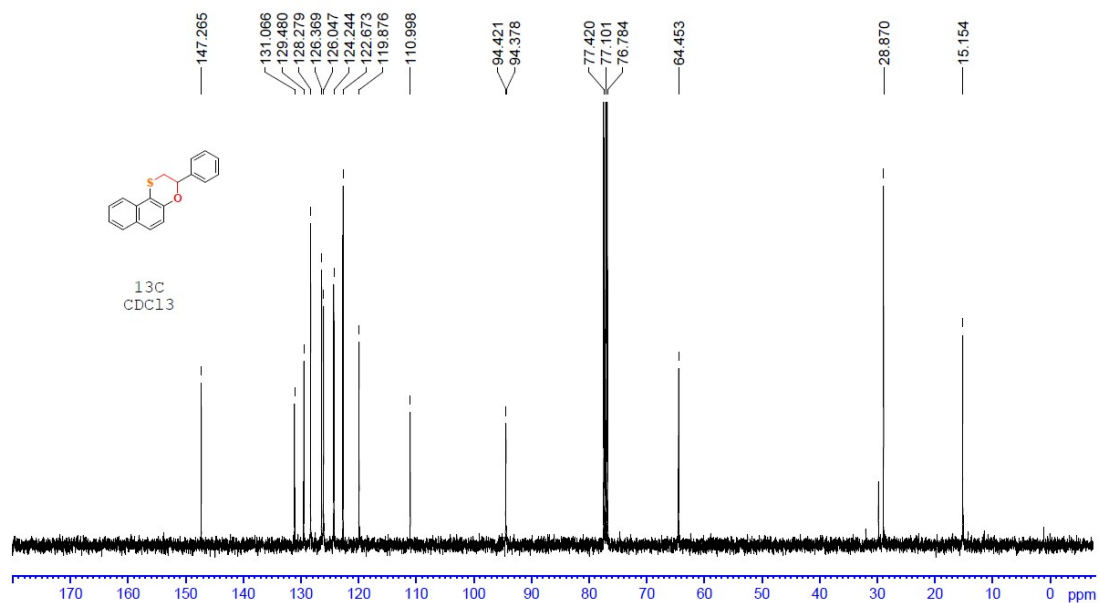

Figure S96. <sup>13</sup>C NMR (100 MHz, CDCl<sub>3</sub>) Spectrum of Compound 5af

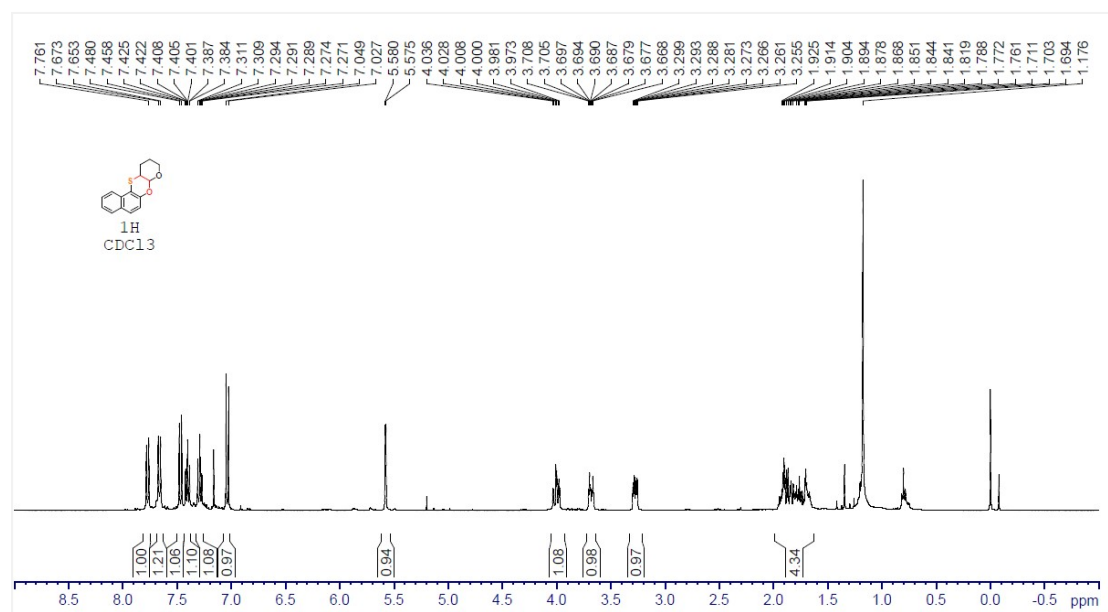

Figure S97. <sup>1</sup>H NMR (400 MHz, CDCl<sub>3</sub>) Spectrum of Compound 5ag

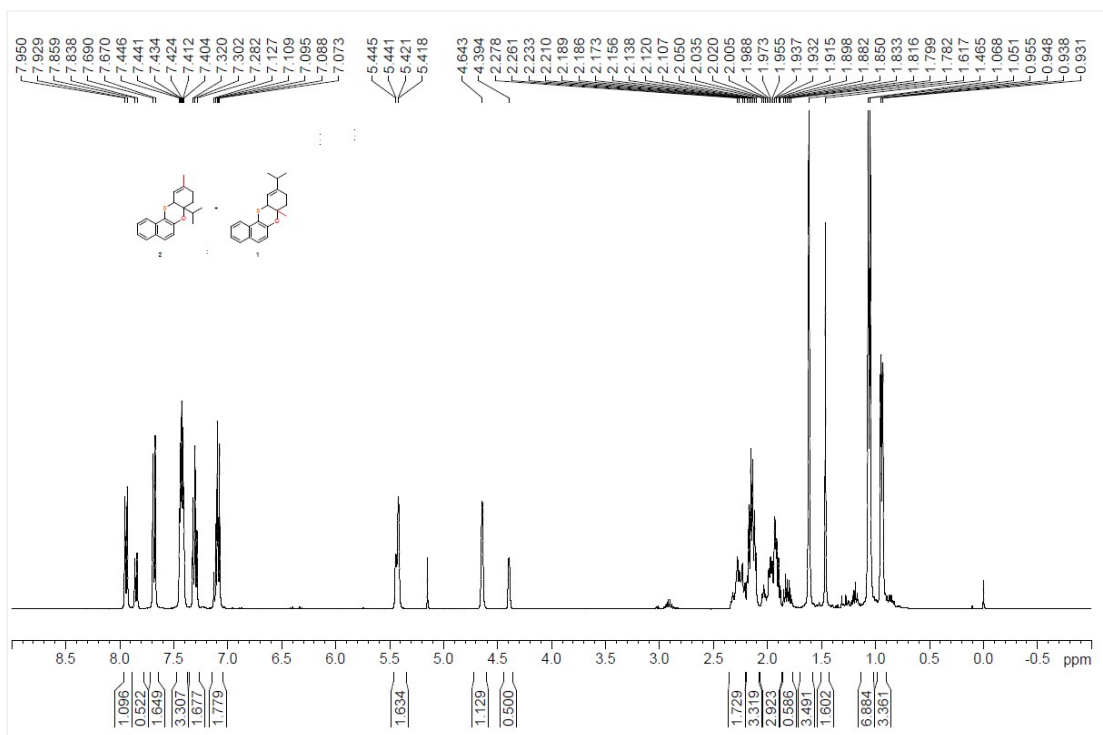

**Figure S98.**  $^1\text{H}$  NMR (400 MHz,  $\text{CDCl}_3$ ) Spectra of Compounds **5ah1** and **5ah2**

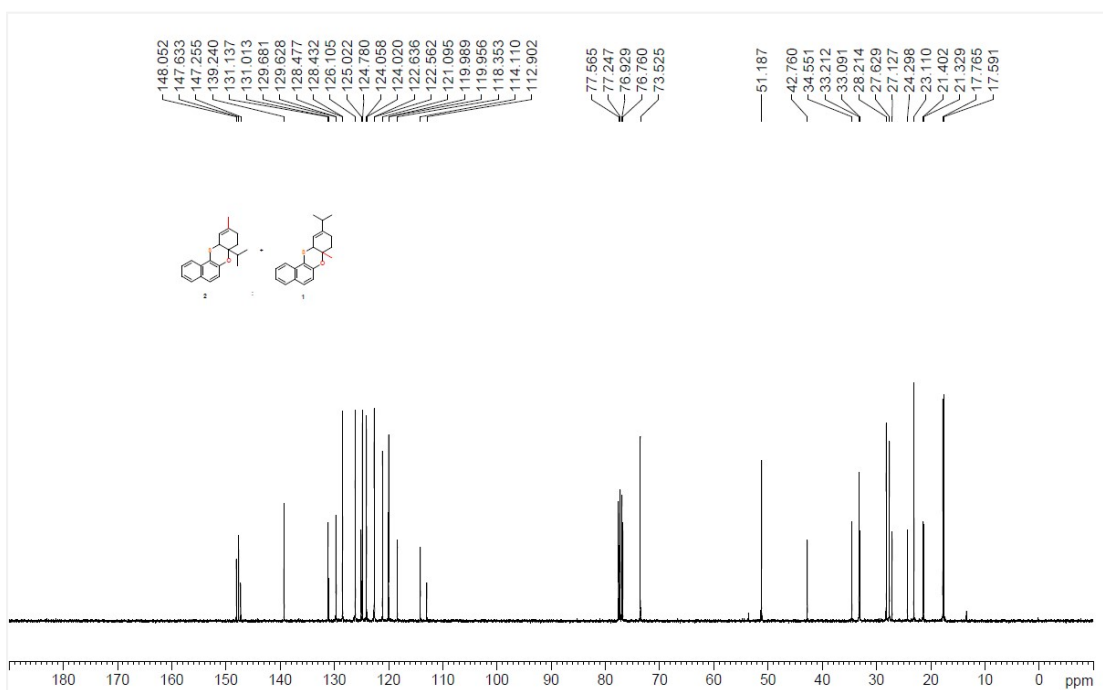

**Figure S99.**  $^{13}\text{C}$  NMR (100 MHz,  $\text{CDCl}_3$ ) Spectra of the Compounds **5ah1** and **5ah2**

## 2.4 HRMS spectra

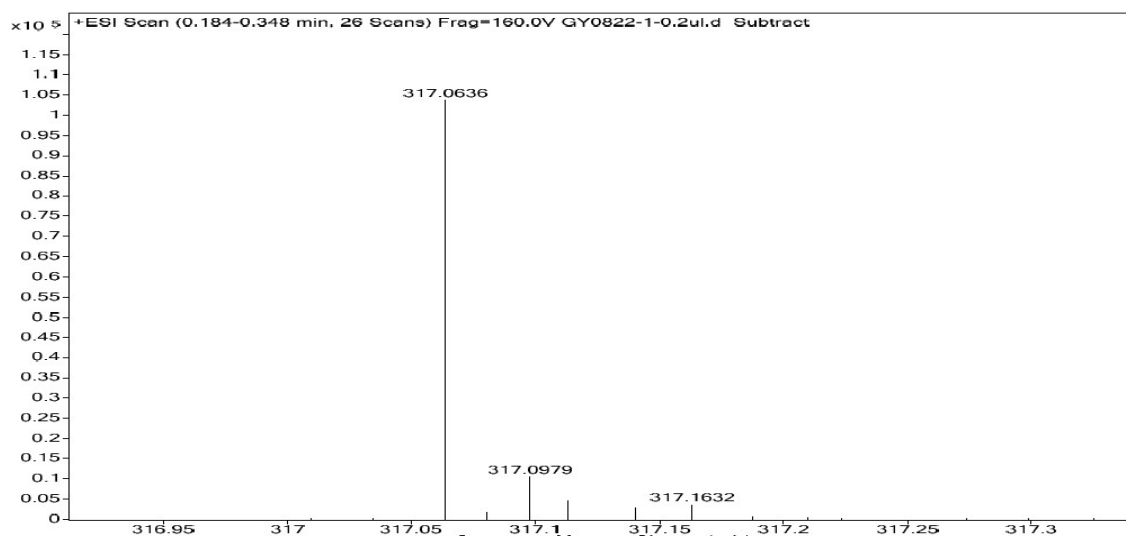

Figure S100. HRMS (ESI-TOF) Spectrum of Compound 3a

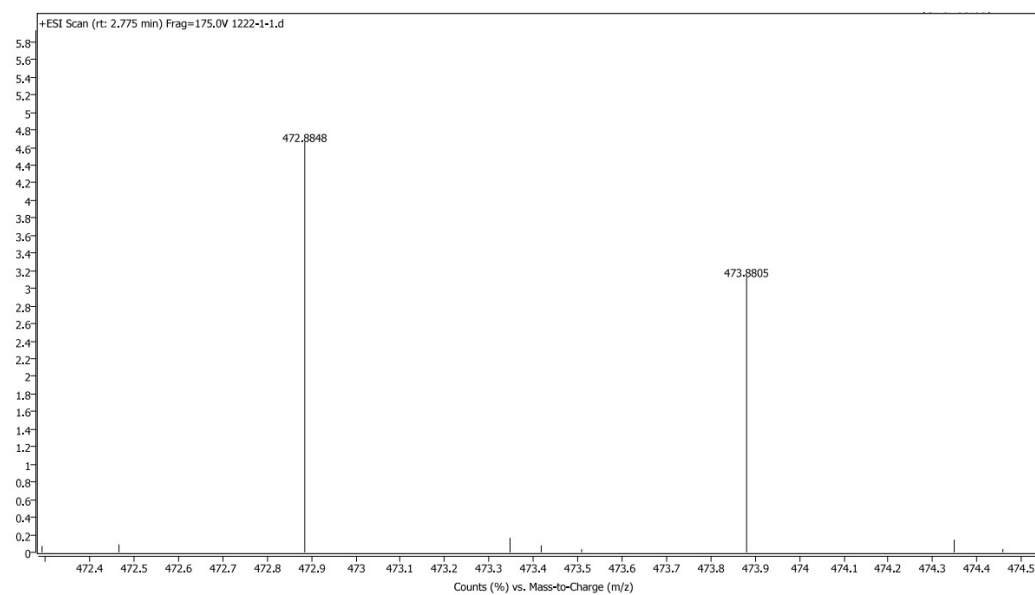

Figure S101. HRMS (ESI-TOF) Spectrum of Compound 3b

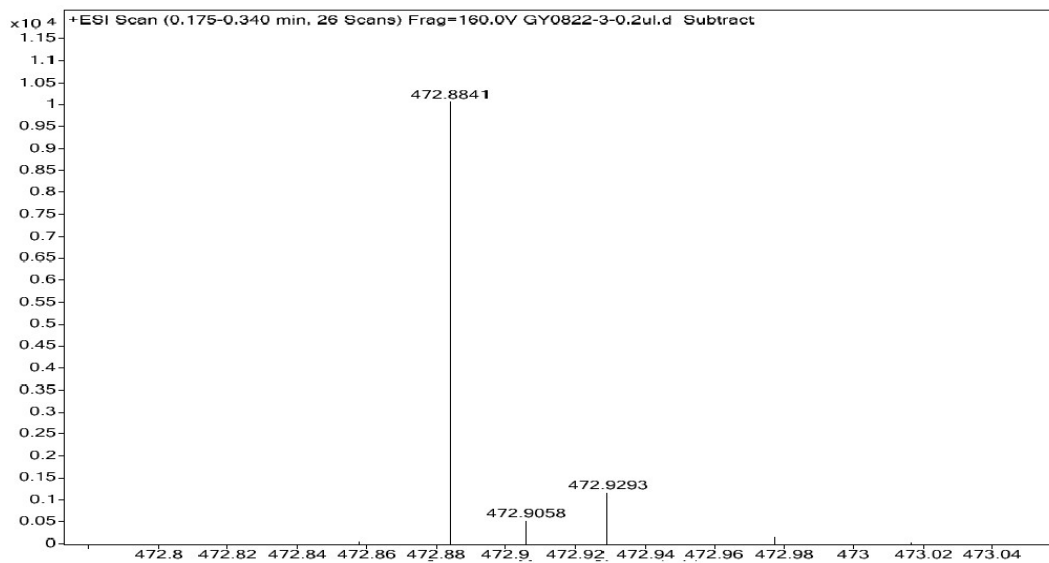

**Figure S102.** HRMS (ESI-TOF) Spectrum of Compound **3c**

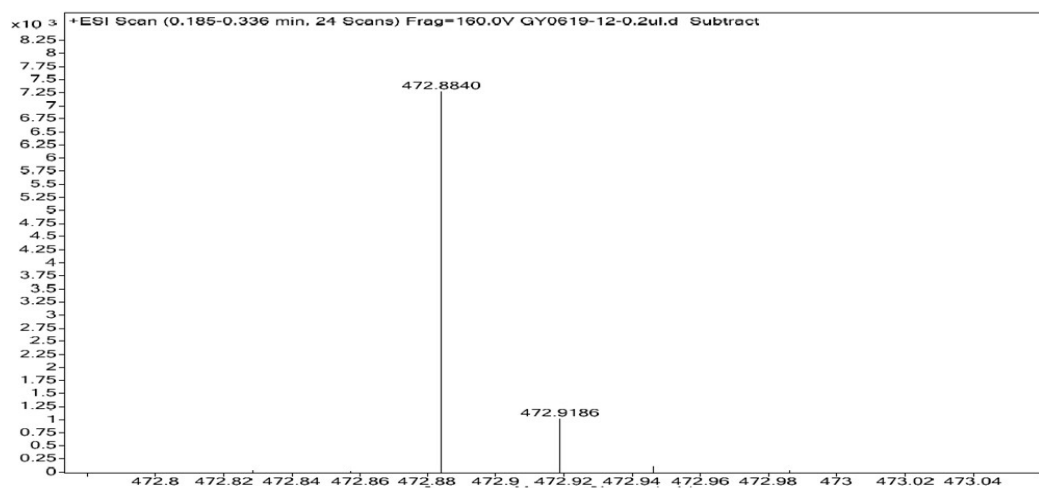

**Figure S103.** HRMS (ESI-TOF) Spectrum of Compound **3d**

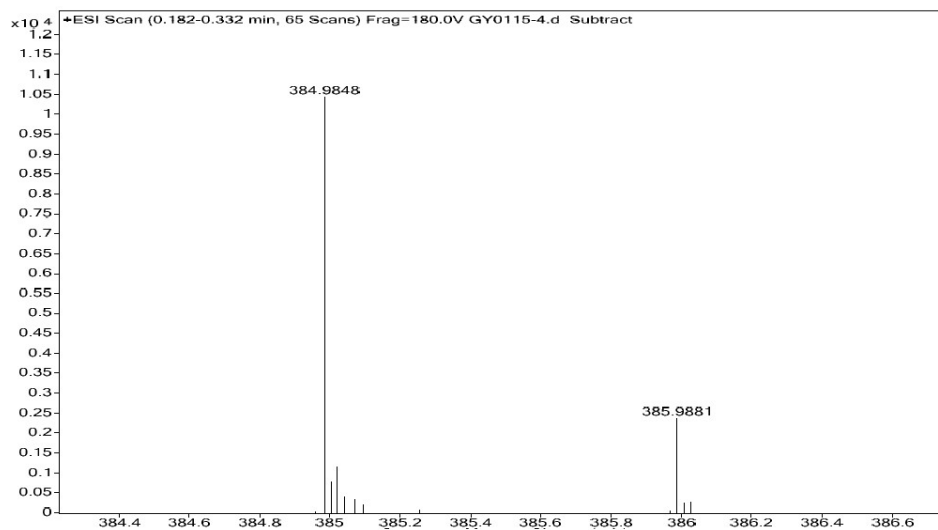

**Figure S104.** HRMS (ESI-TOF) Spectrum of Compound **3e**



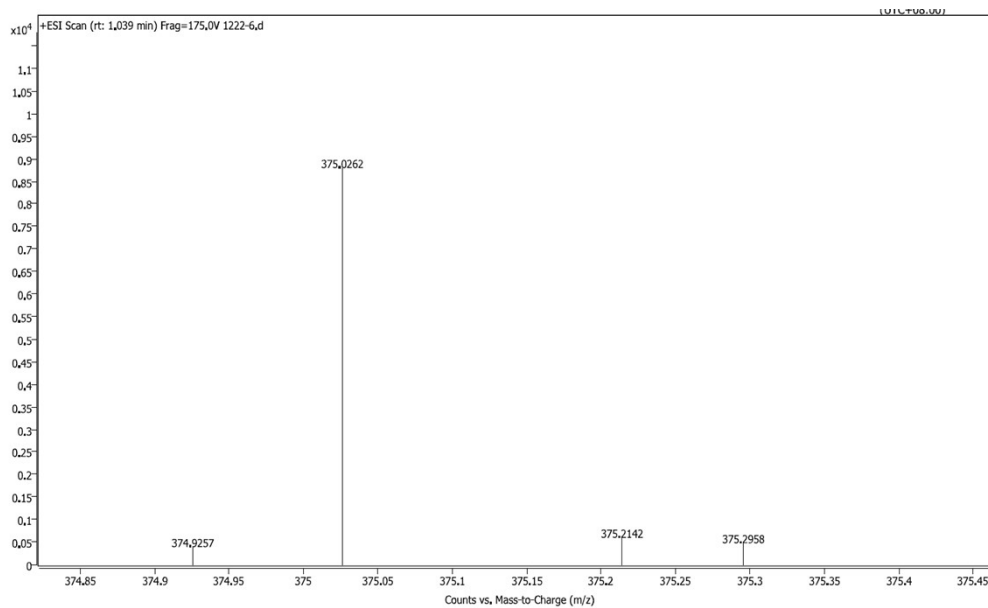

Figure S105. HRMS (ESI-TOF) Spectrum of Compound 3f

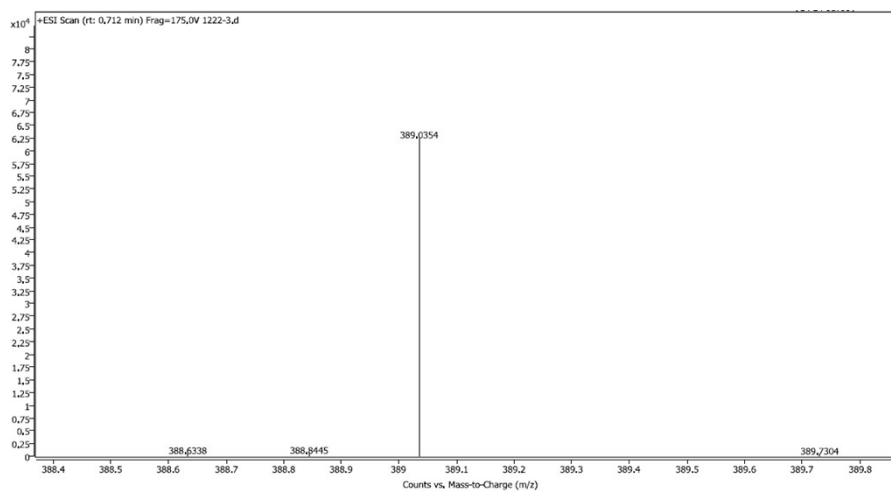

Figure S106. HRMS (ESI-TOF) Spectrum of Compound 3g

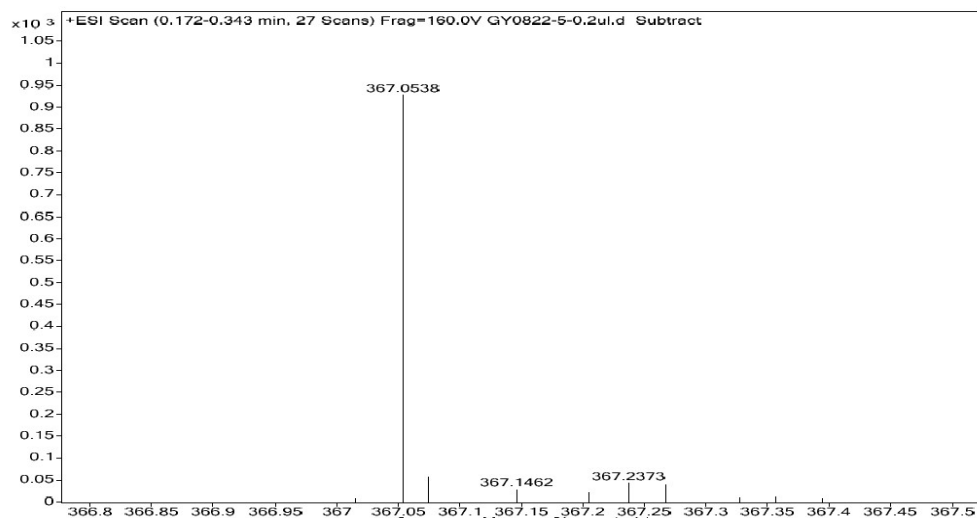

Figure S107. HRMS (ESI-TOF) Spectrum of Compound 3h

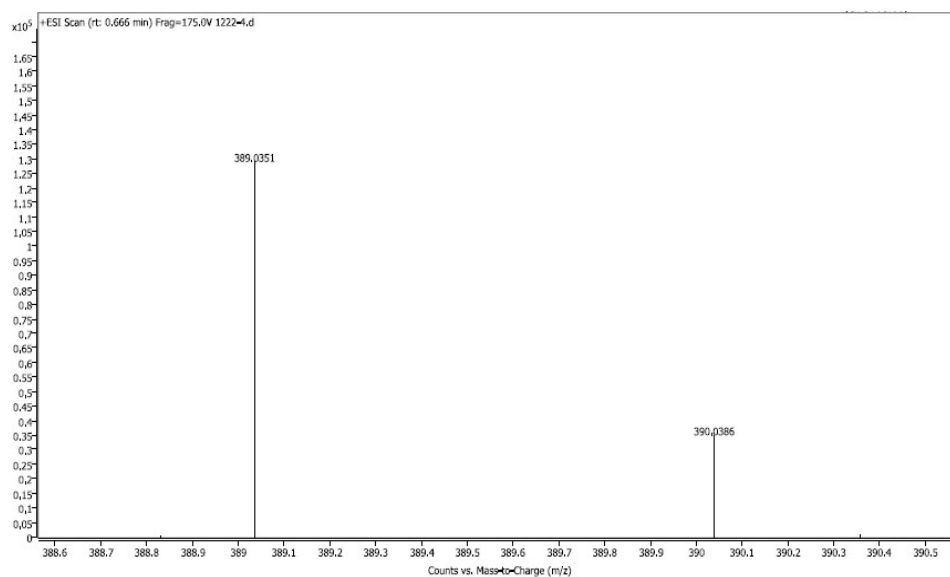

Figure S108. HRMS (ESI-TOF) Spectrum of Compound 3i

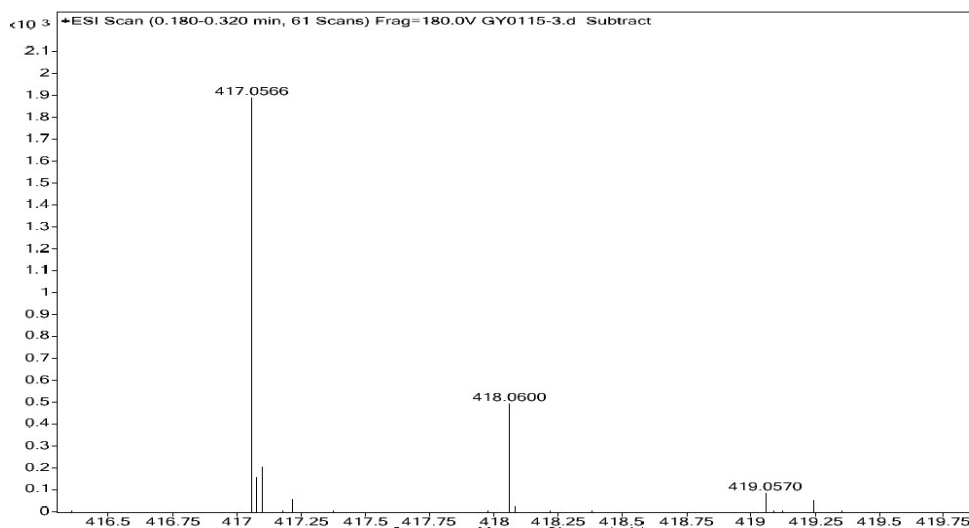

Figure S109. HRMS (ESI-TOF) Spectrum of Compound 3j

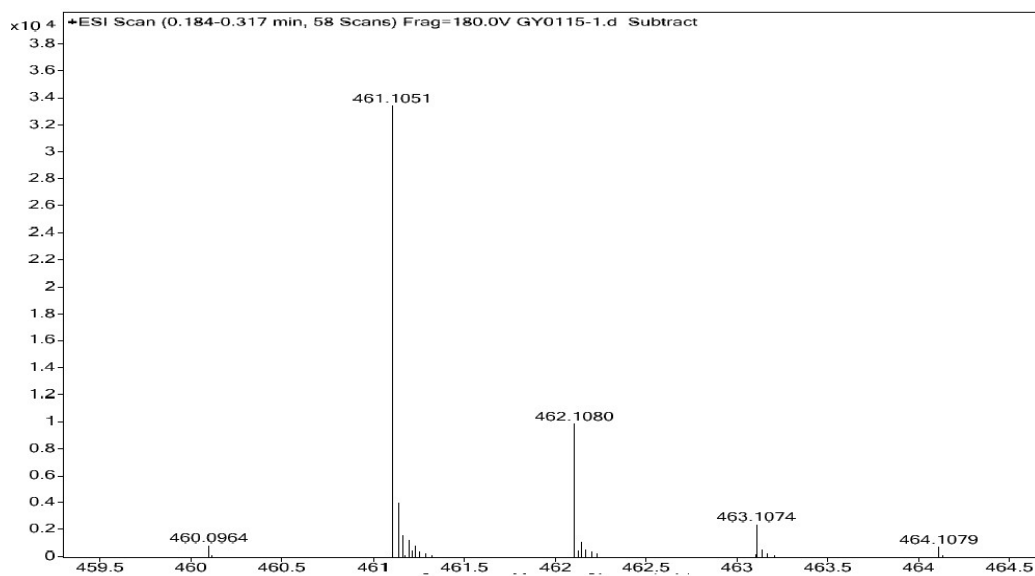

Figure S110. HRMS (ESI-TOF) Spectrum of Compound 3k

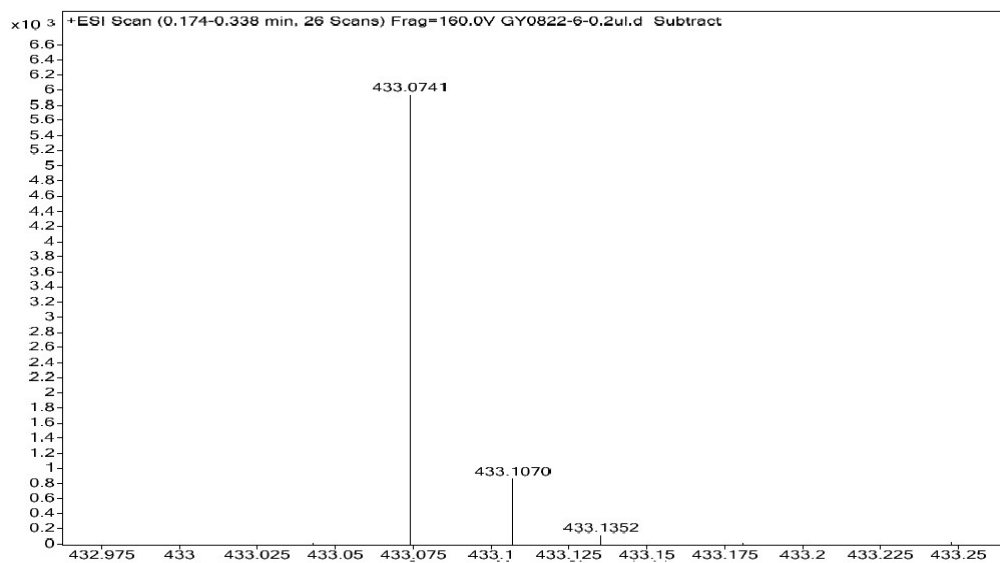

**Figure S111.** HRMS (ESI-TOF) Spectrum of Compound **3l**

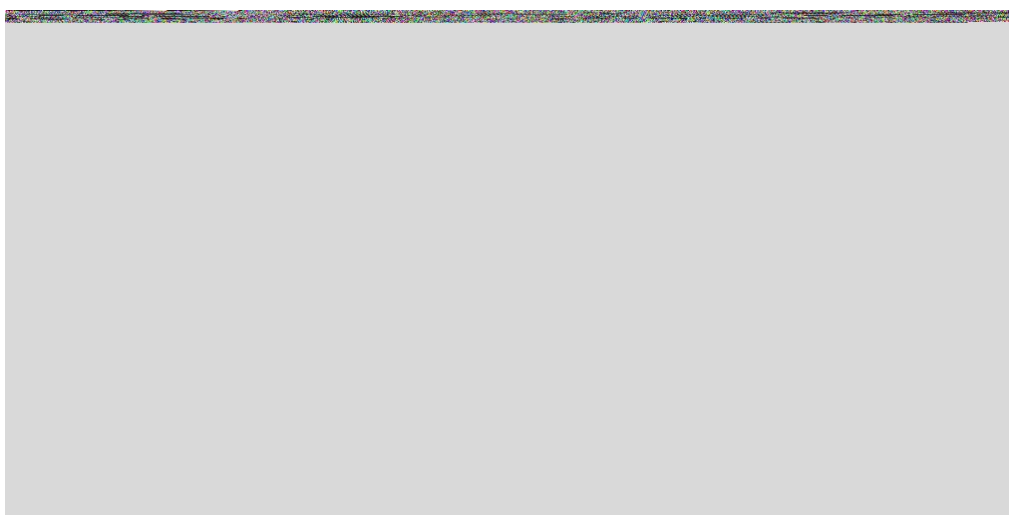

**Figure S112.** HRMS (ESI-TOF) Spectrum of Compound **3m**

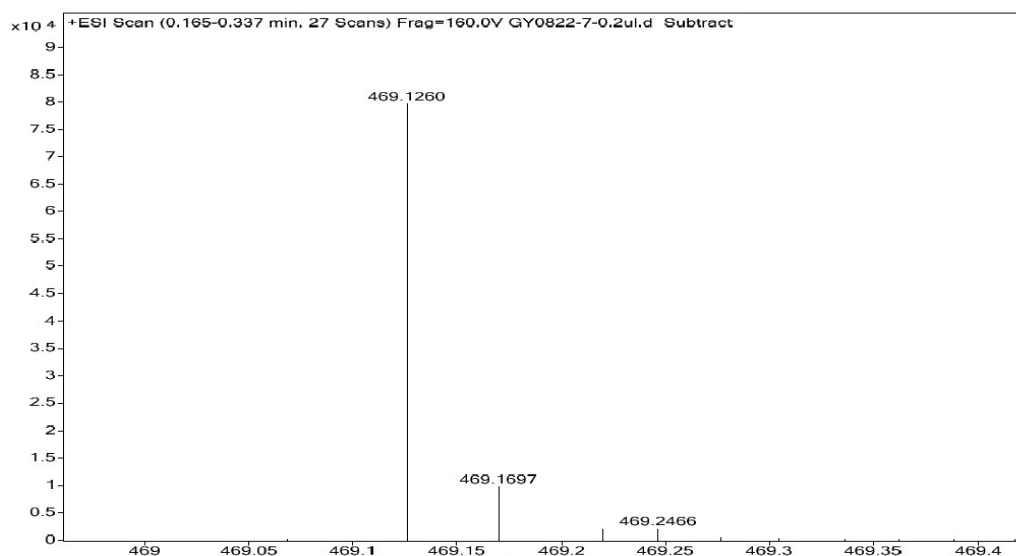

**Figure S113.** HRMS (ESI-TOF) Spectrum of Compound **3o**

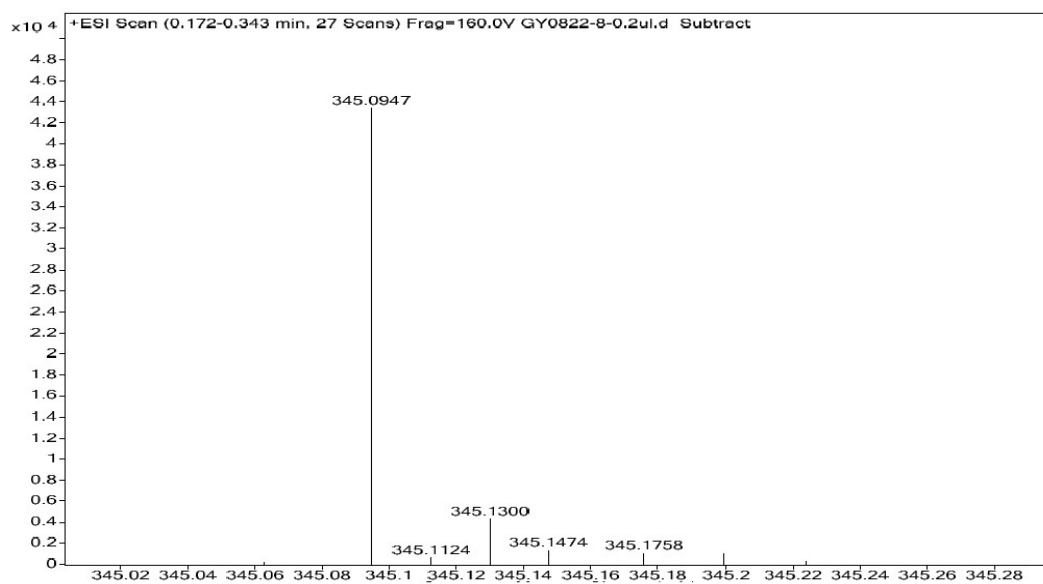

**Figure S114.** HRMS (ESI-TOF) Spectrum of Compound **3p**

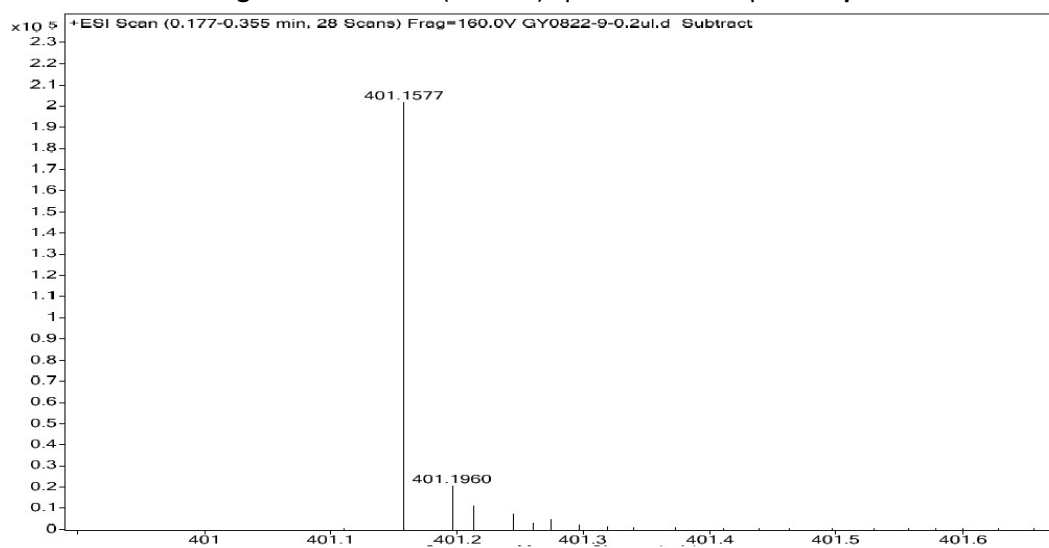

**Figure S115.** HRMS (ESI-TOF) Spectrum of Compound **3q**

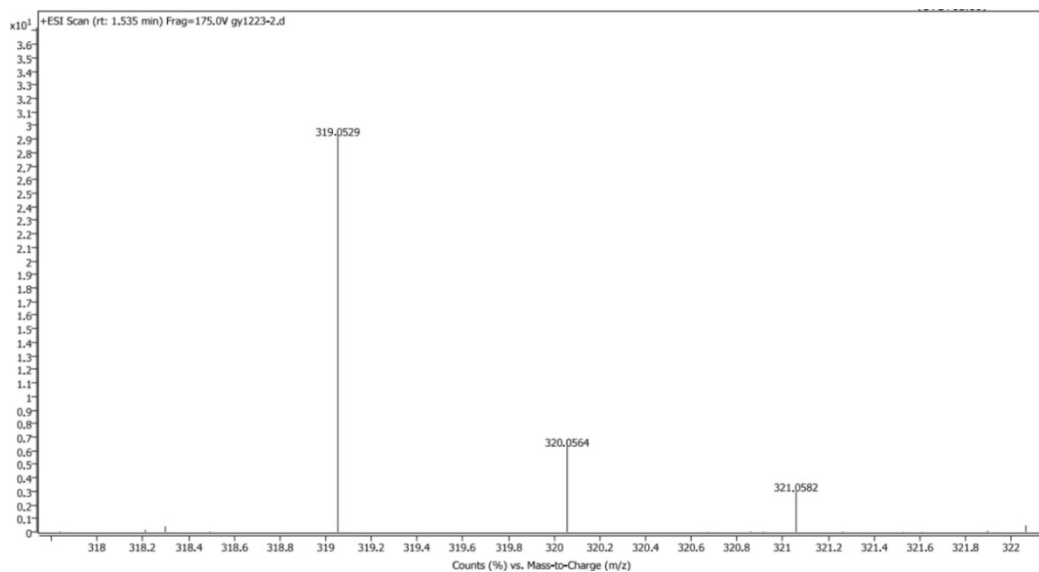

**Figure S116.** HRMS (ESI-TOF) Spectrum of Compound **3r**

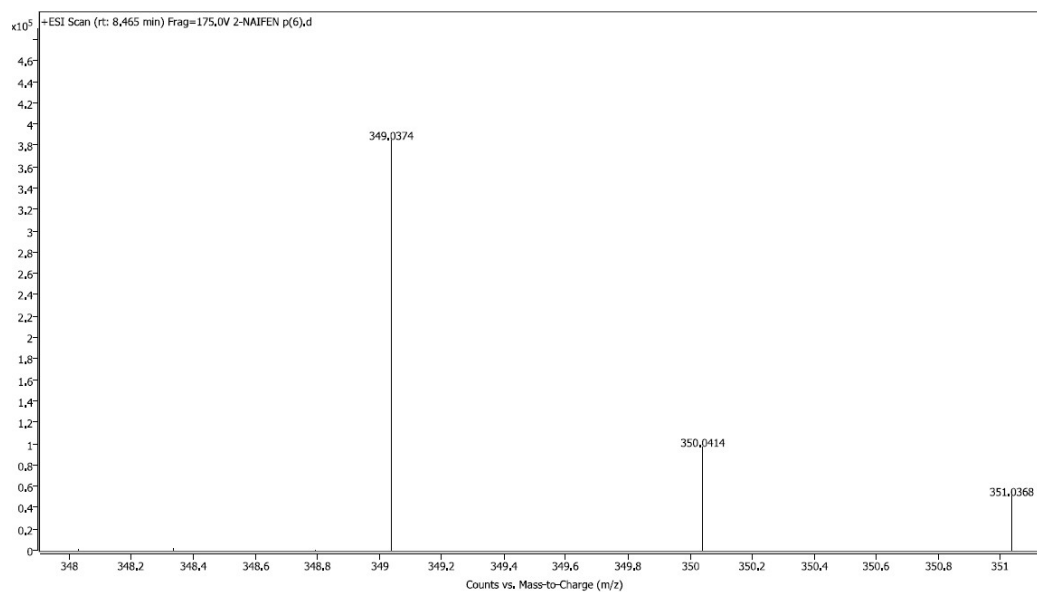

Figure S117. HRMS (ESI-TOF) Spectrum of Compound 2a

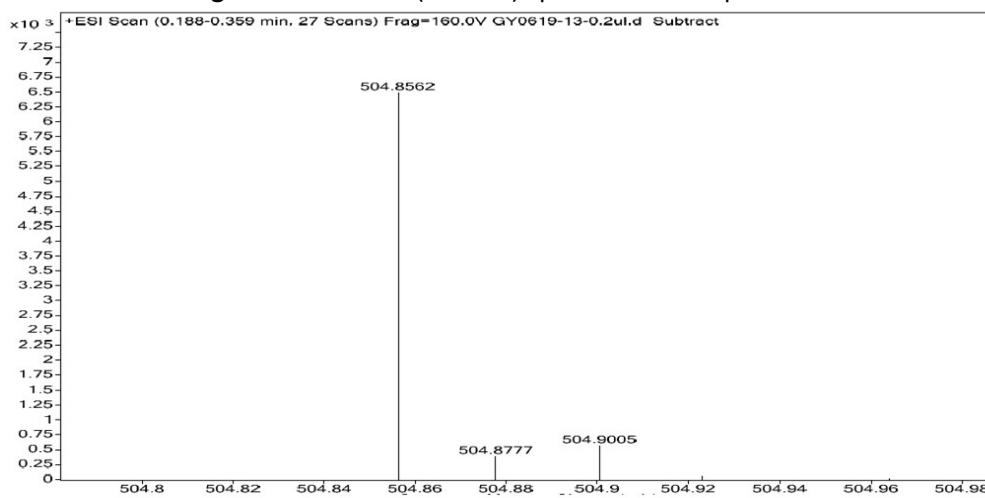

Figure S118. HRMS (ESI-TOF) Spectrum of Compound 2b

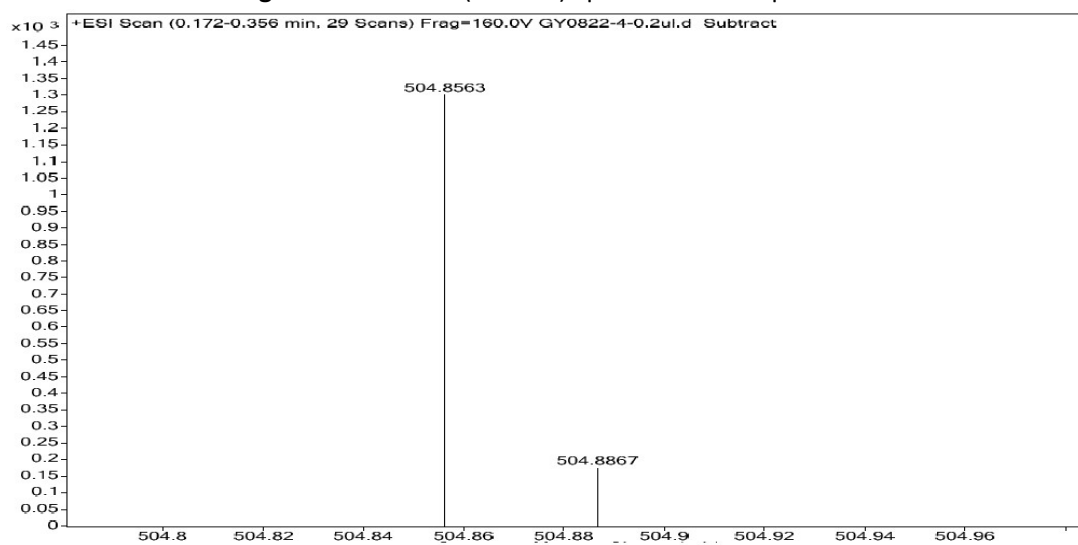

Figure S119. HRMS (ESI-TOF) Spectrum of Compound 2c

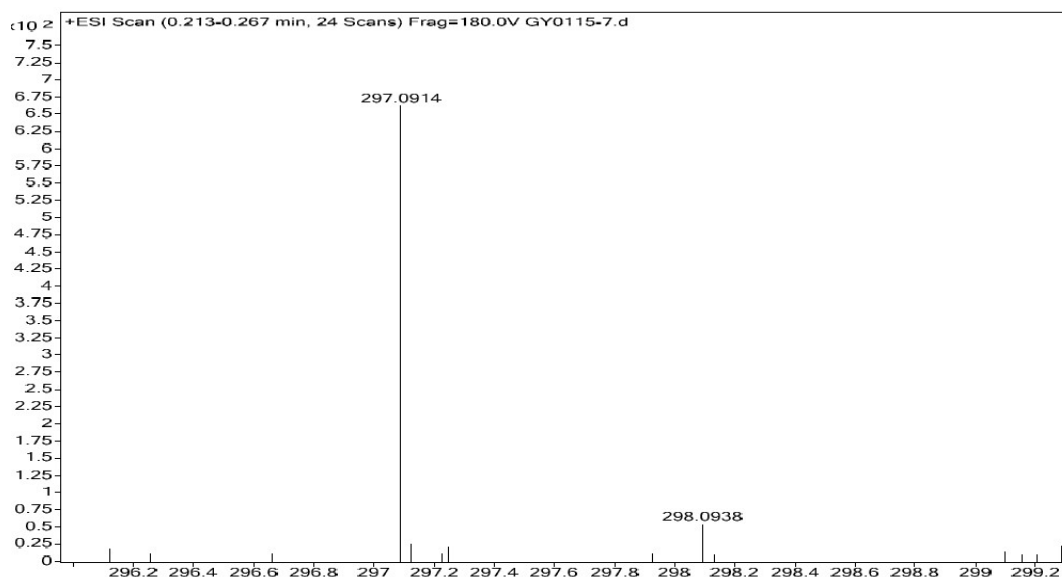

Figure S120. HRMS (ESI-TOF) Spectrum of Compound 5a

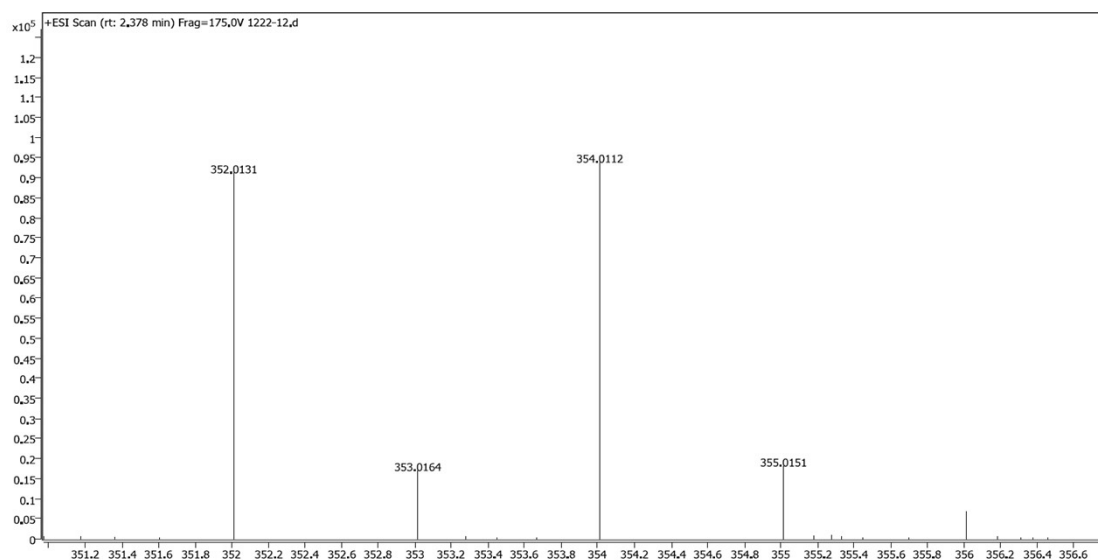

Figure S121. HRMS (ESI-TOF) Spectrum of Compound 5b

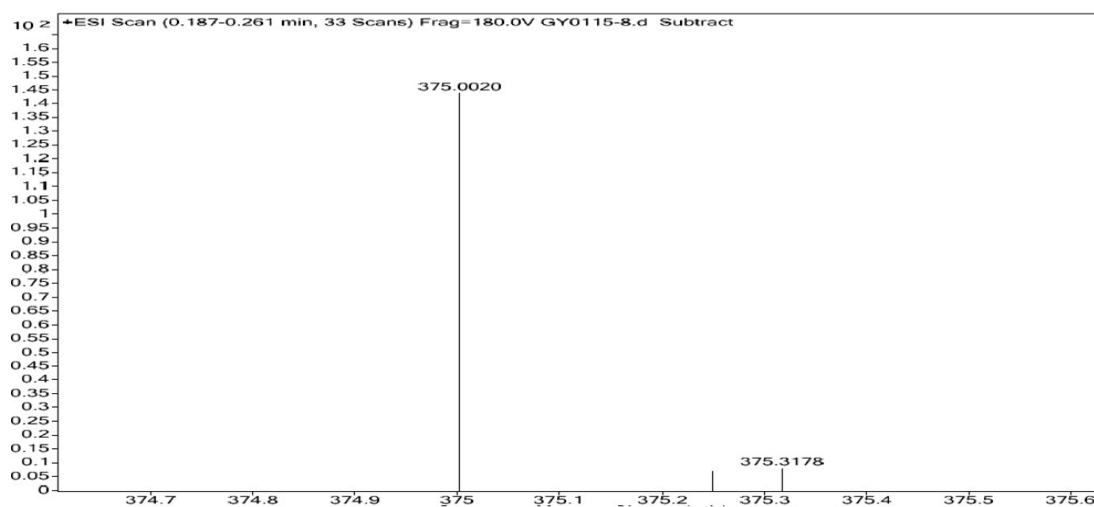

Figure S122. HRMS (ESI-TOF) Spectrum of Compound 5c

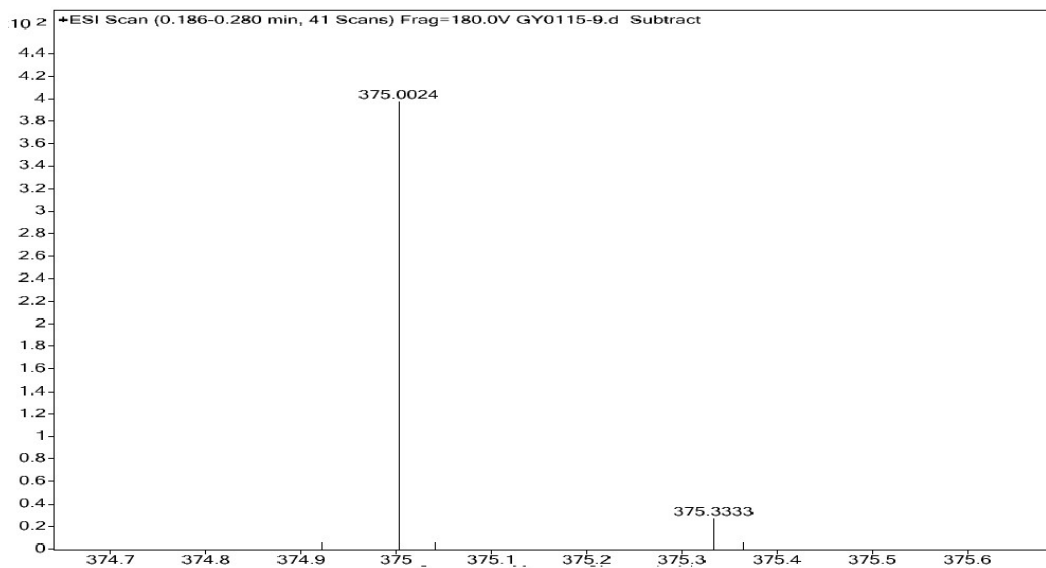

Figure S123. HRMS (ESI-TOF) Spectrum of Compound 5d

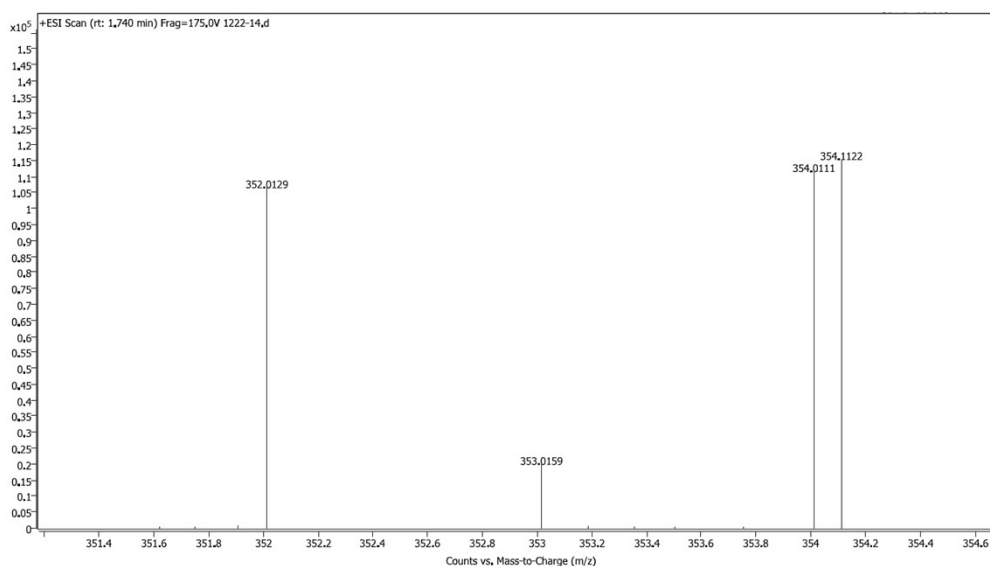

Figure S124. HRMS (ESI-TOF) Spectrum of Compound 5e

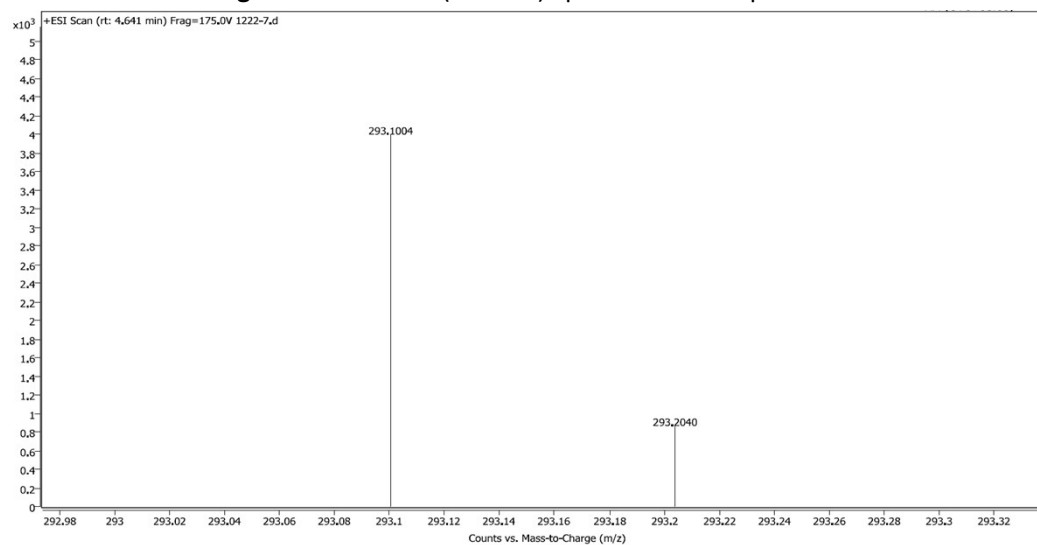

Figure S125. HRMS (ESI-TOF) Spectrum of Compound 5f

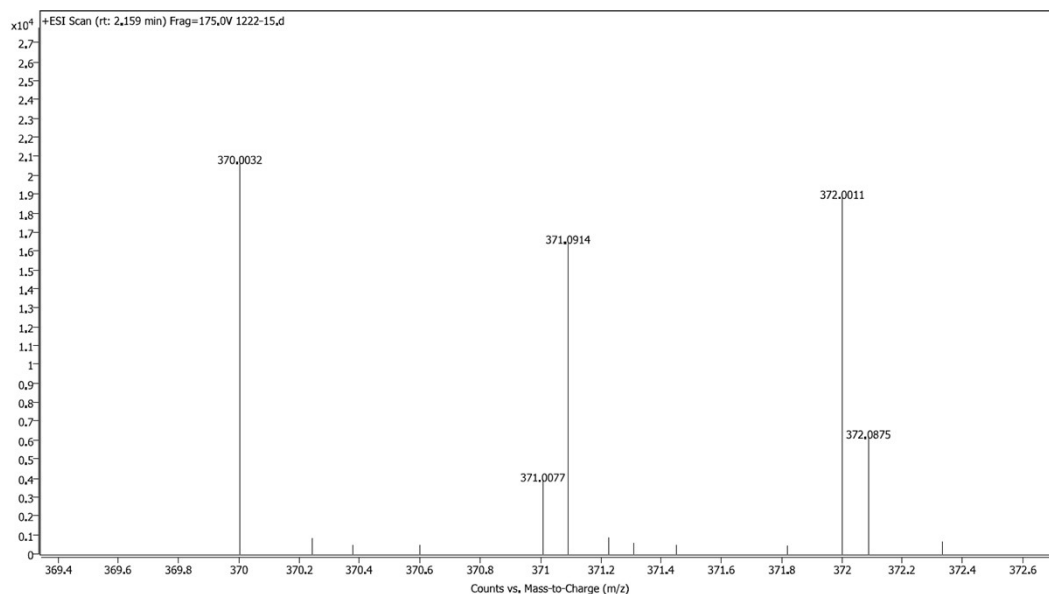

**Figure S126. HRMS (ESI-TOF) Spectrum of Compound 5g**

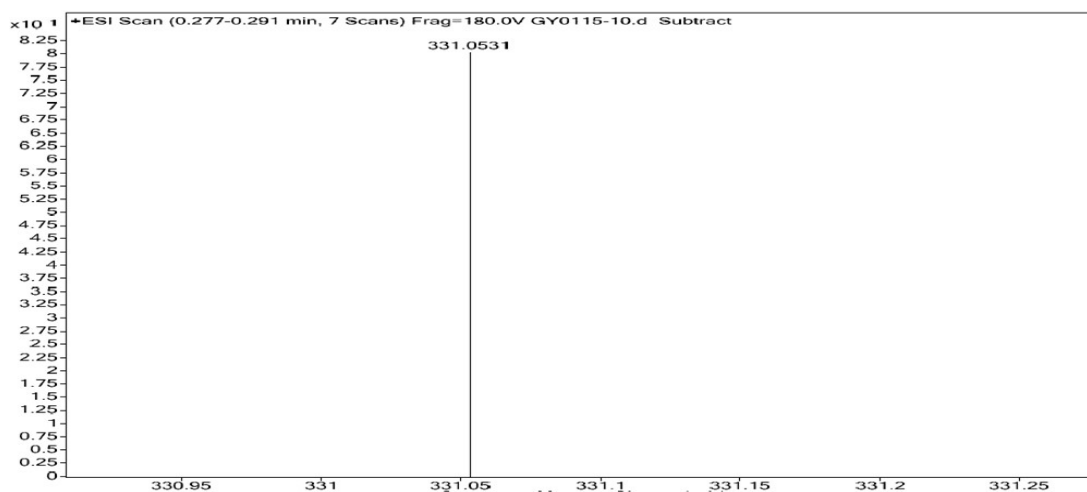

**Figure S127. HRMS (ESI-TOF) Spectrum of Compound 5h**

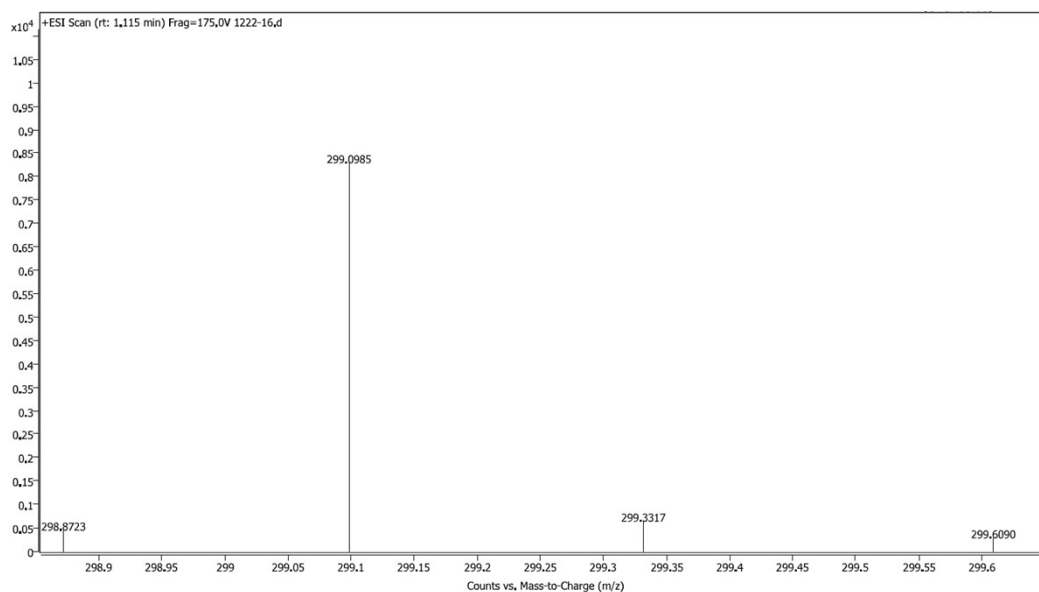



**Figure S128.** HRMS (ESI-TOF) Spectrum of Compound **5i**

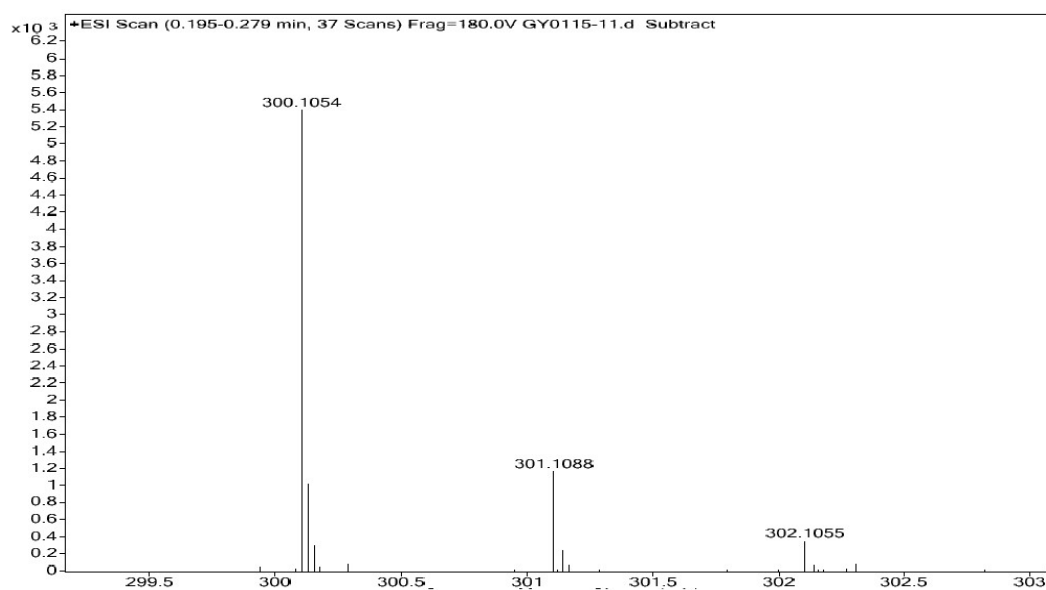

**Figure S129.** HRMS (ESI-TOF) Spectrum of Compound **5j**

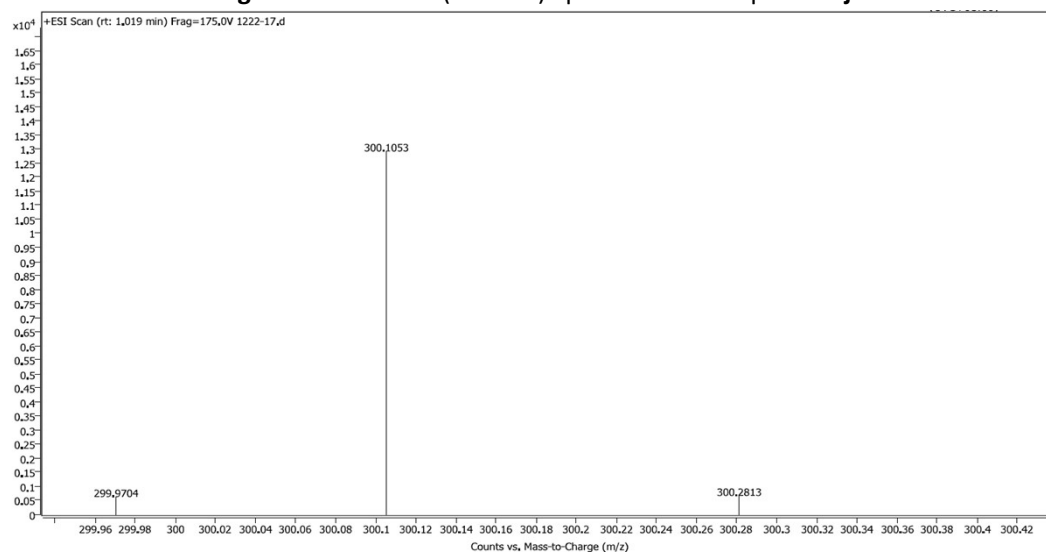

**Figure S130.** HRMS (ESI-TOF) Spectrum of Compound **5k**

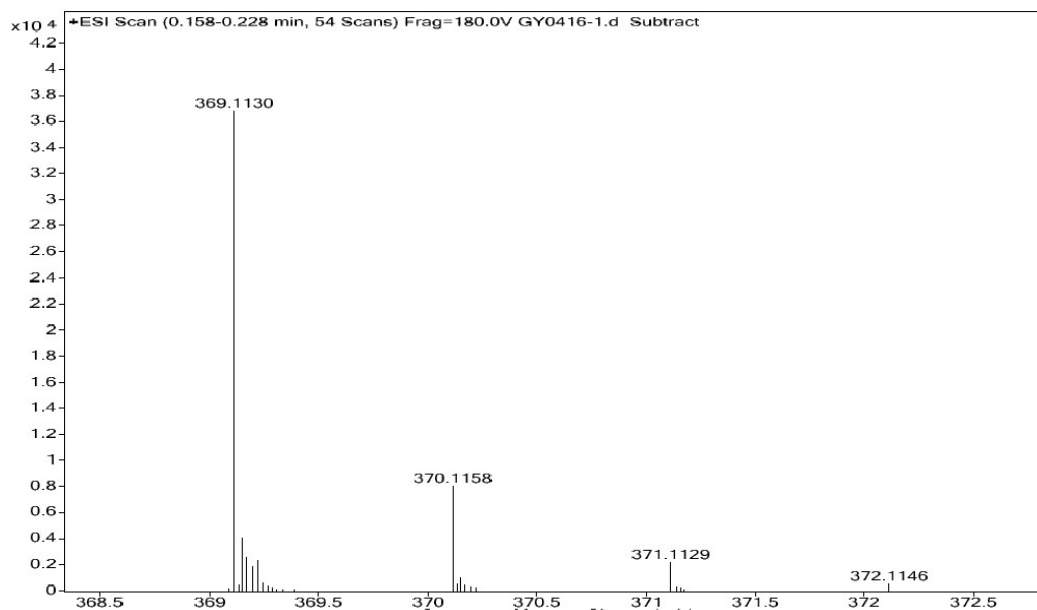

Figure S131. HRMS (ESI-TOF) Spectrum of Compound 5l

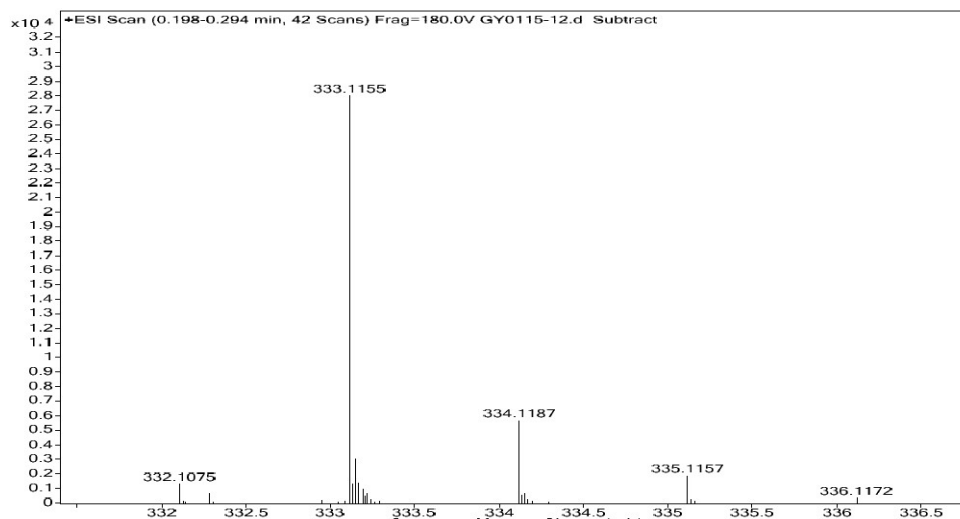

Figure S132. HRMS (ESI-TOF) Spectrum of Compound 5m

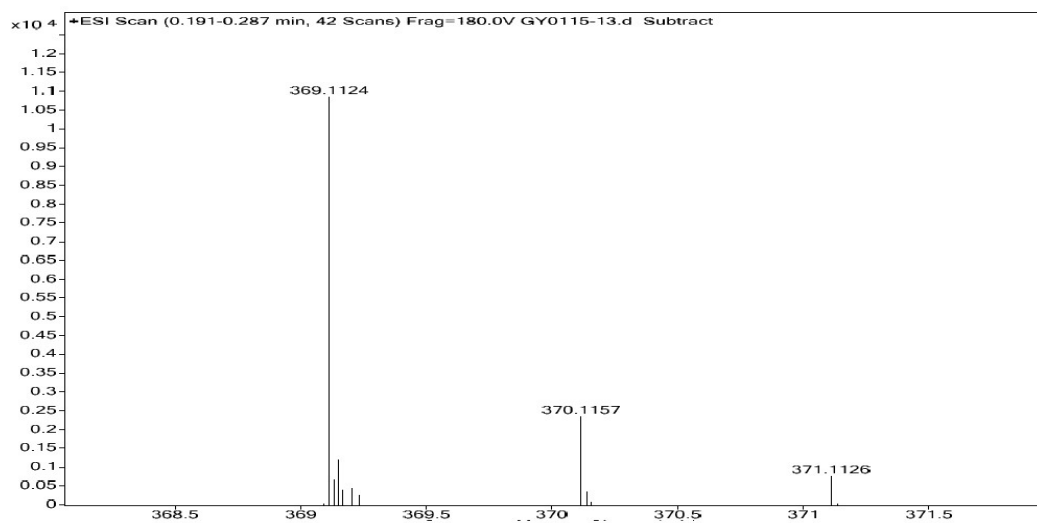

Figure S133. HRMS (ESI-TOF) Spectrum of Compound 5n

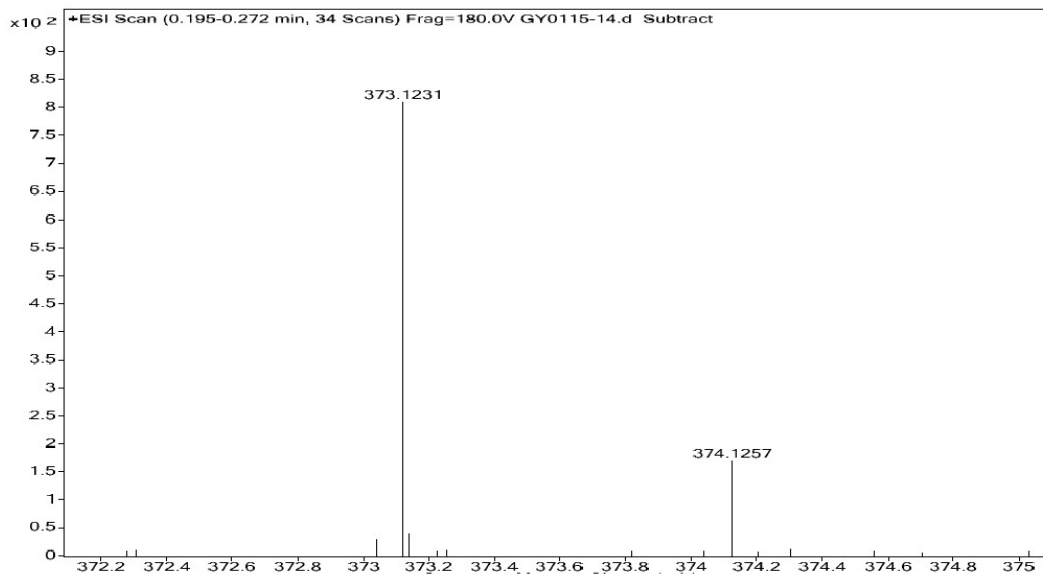

Figure S134 HRMS (ESI-TOF) Spectrum of Compound 5o

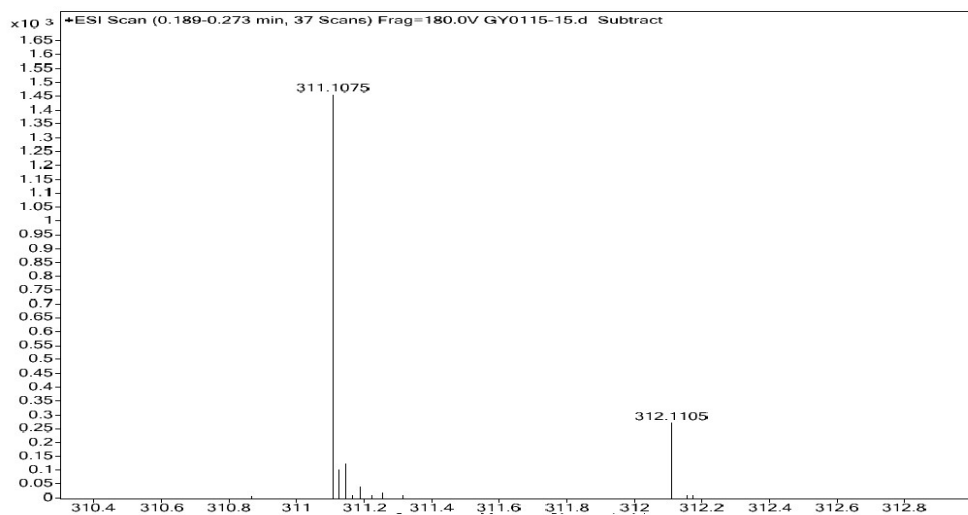

Figure S135. HRMS (ESI-TOF) Spectrum of Compound 5p

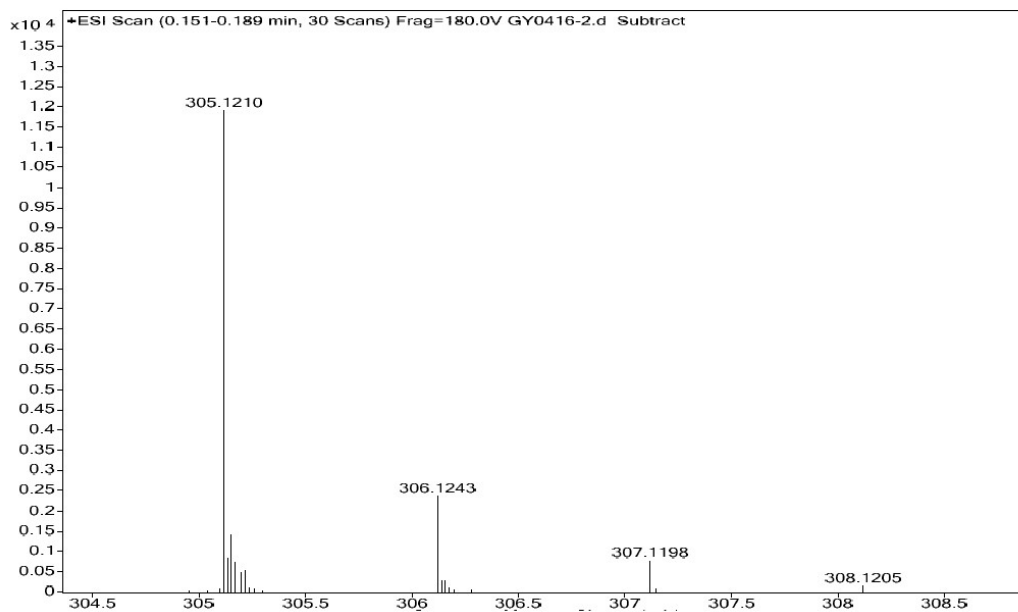

Figure S136. HRMS (ESI-TOF) Spectrum of Compound 5q

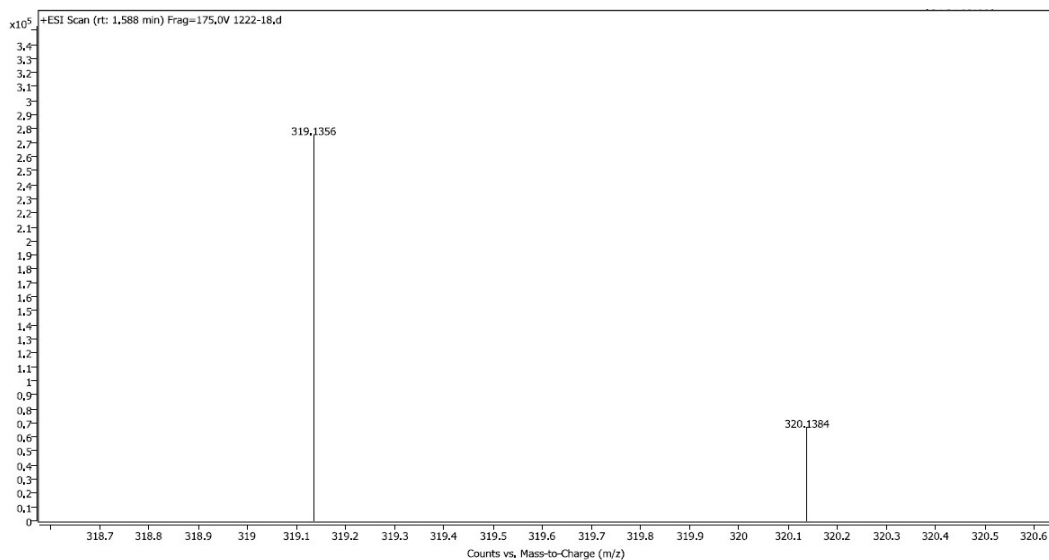

Figure S137. HRMS (ESI-TOF) Spectrum of Compound 5r

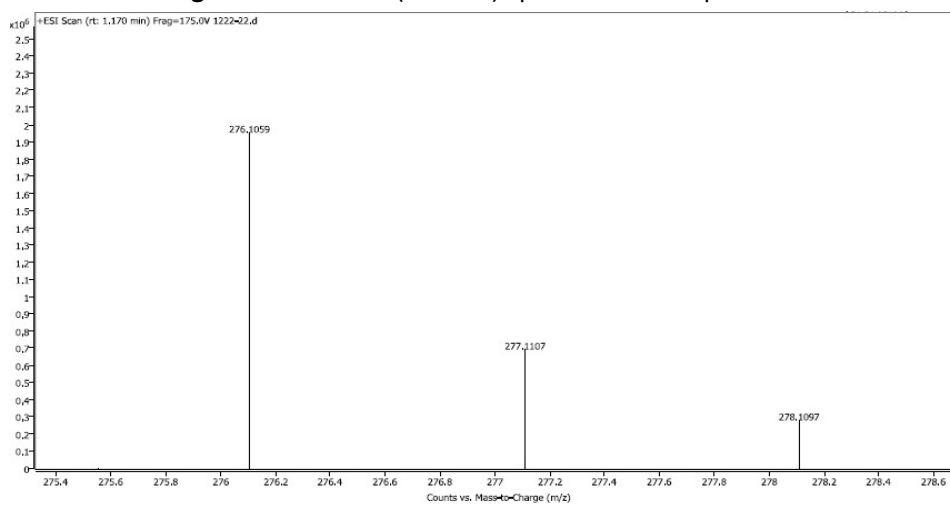

Figure S138. HRMS (ESI-TOF) Spectrum of Compound 5s

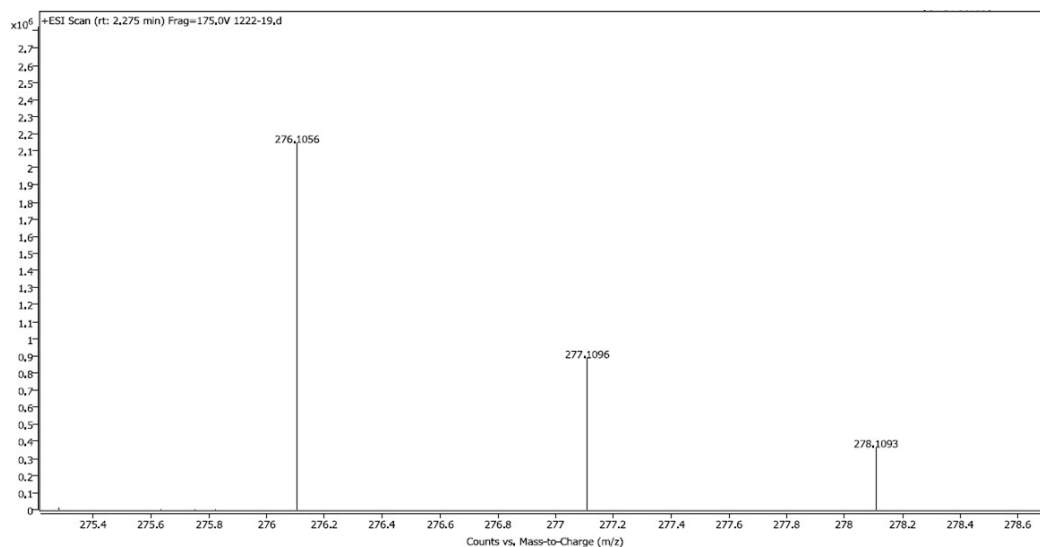

**Figure S139.** HRMS (ESI-TOF) Spectrum of Compound 5t

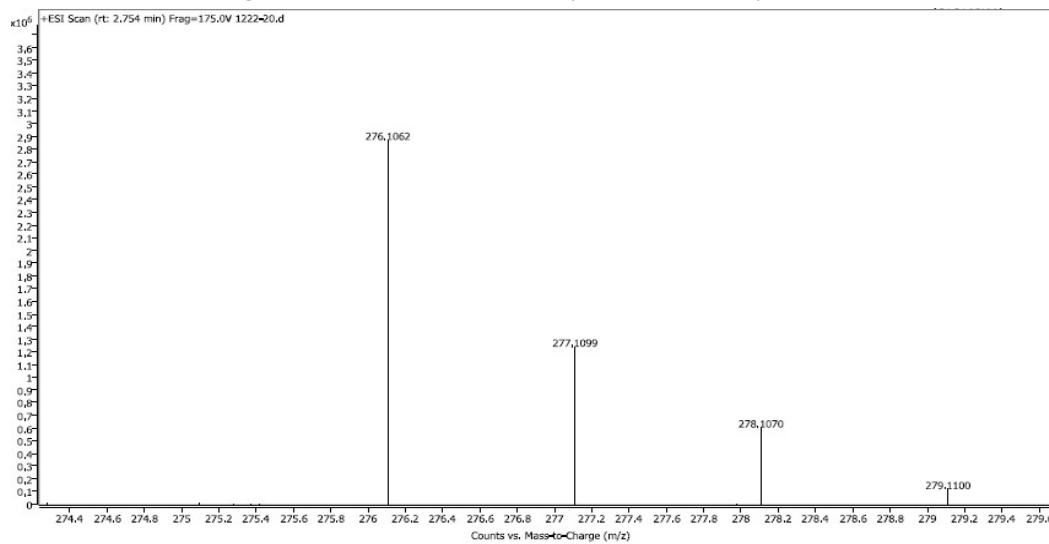

**Figure S140.** HRMS (ESI-TOF) Spectrum of Compound 5u

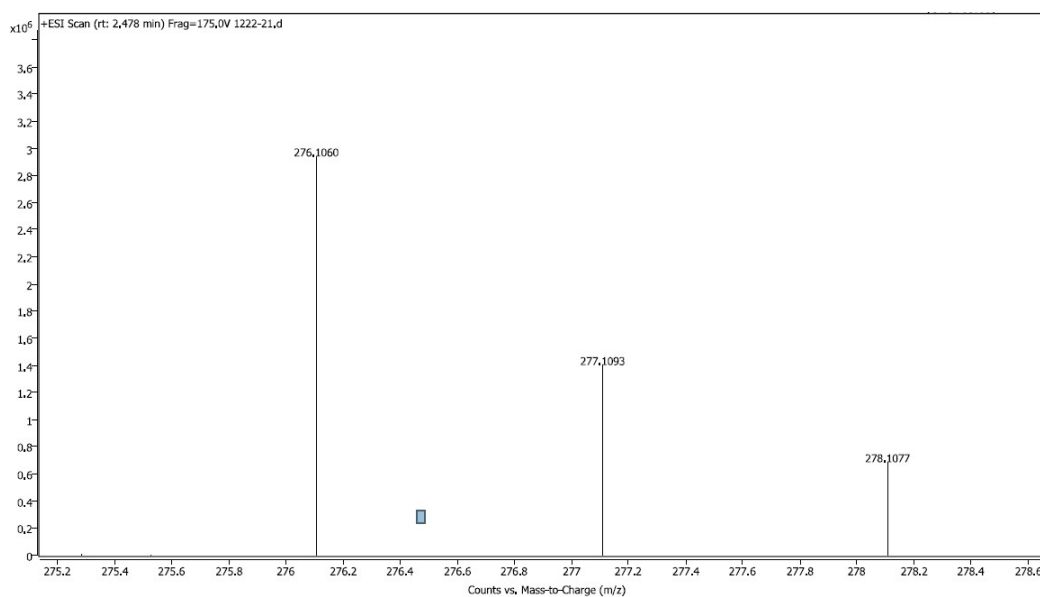

**Figure S141.** HRMS (ESI-TOF) Spectrum of Compound 5v

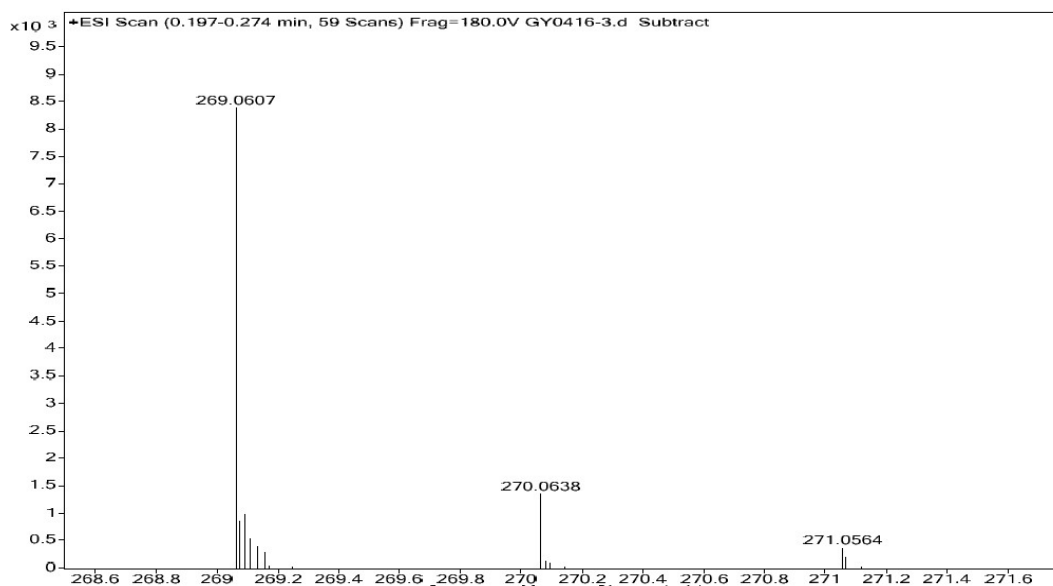

**Figure S142. HRMS (ESI-TOF) Spectrum of Compound 5ab**

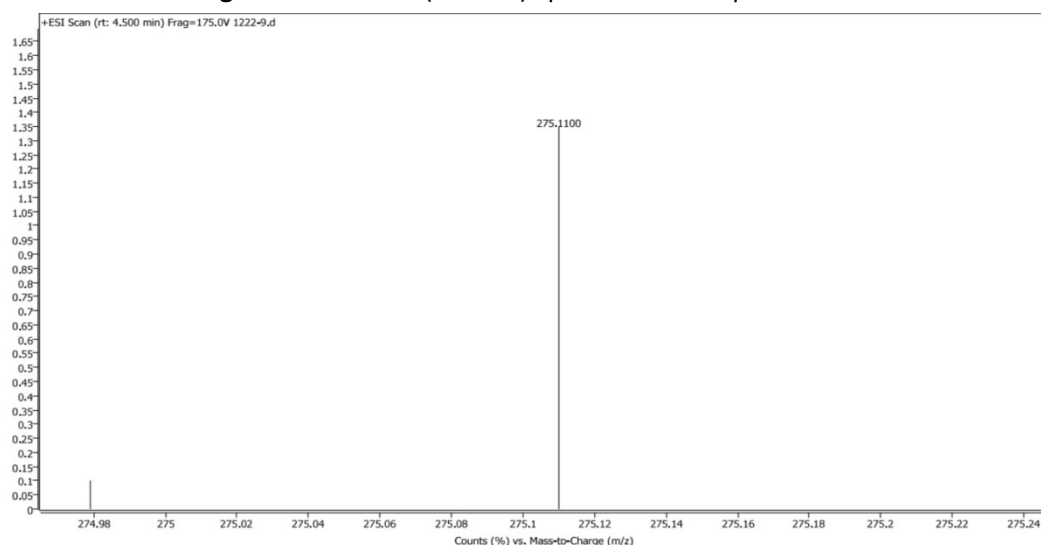

**Figure S143. HRMS (ESI-TOF) Spectrum of Compound 5ac**

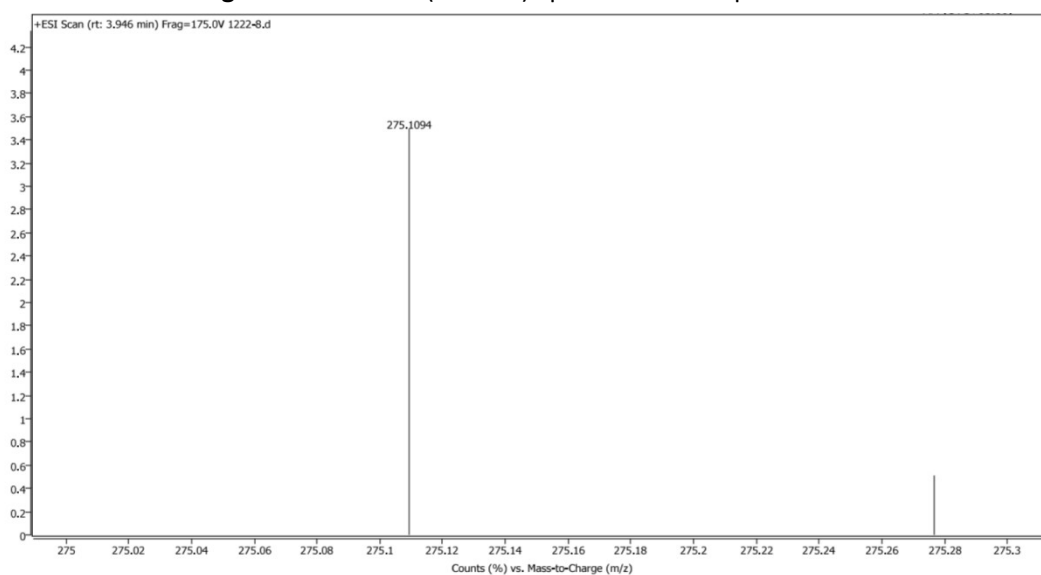

**Figure S144. HRMS (ESI-TOF) Spectrum of Compound 5ad**

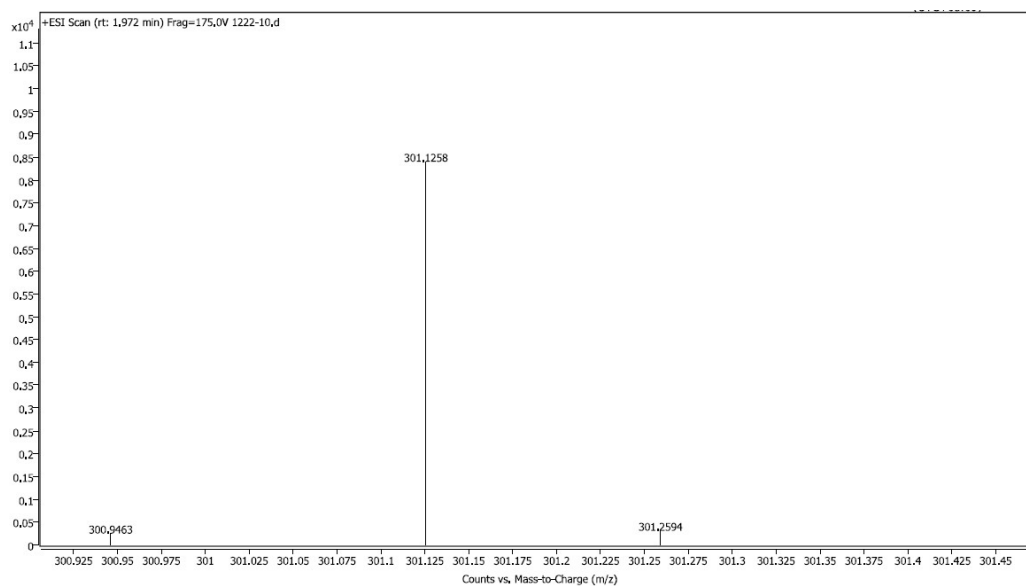

**Figure S145.** HRMS (ESI-TOF) Spectrum of Compound 5ae

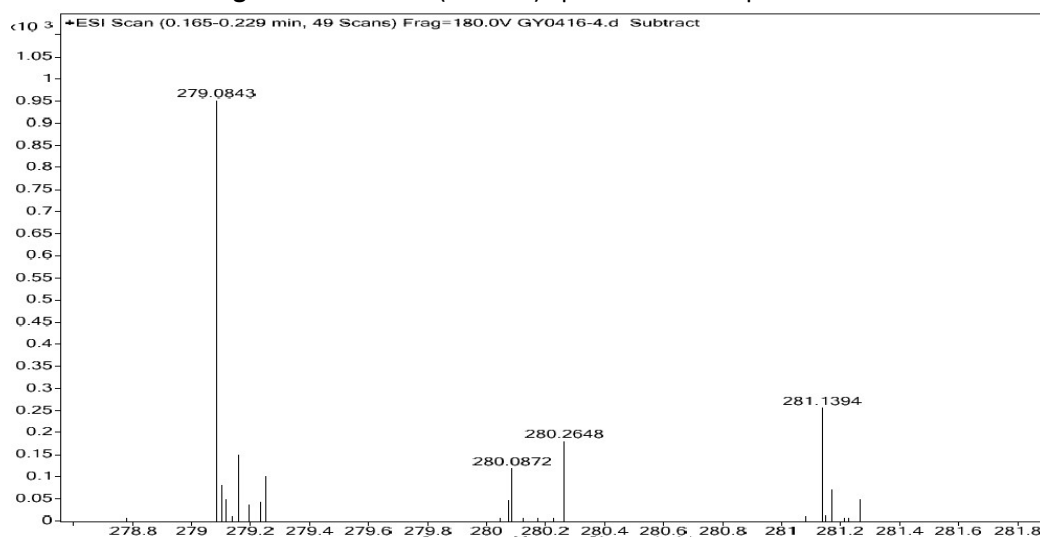

**Figure S146.** HRMS (ESI-TOF) Spectrum of Compound 5af

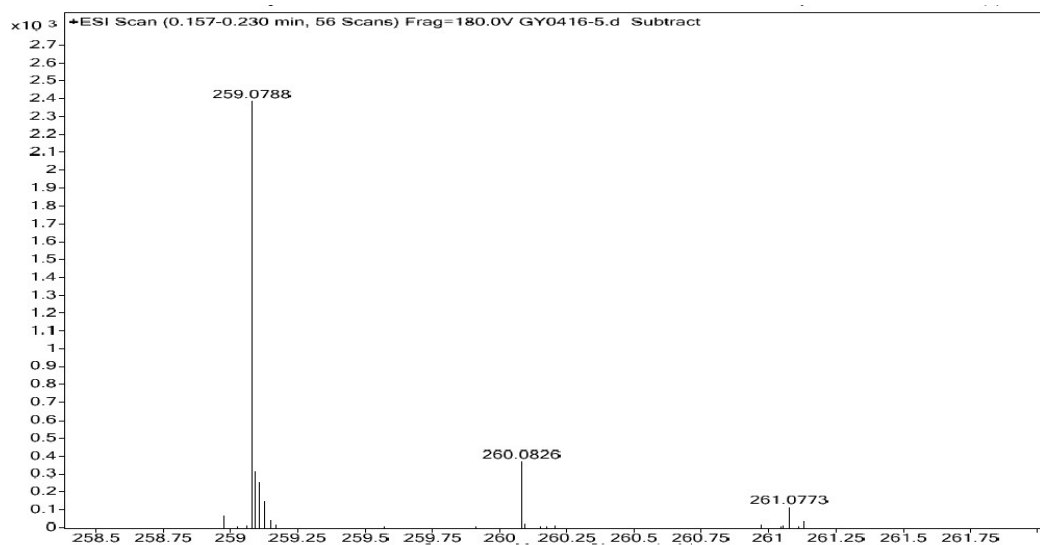

**Figure S147.** HRMS (ESI-TOF) Spectrum of Compound 5ag

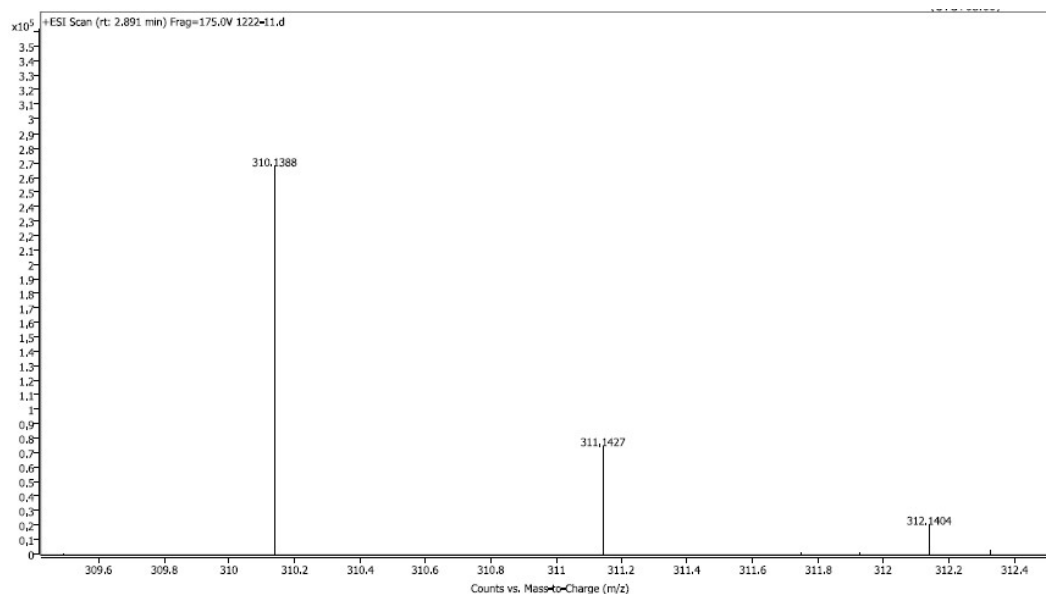

Figure S148. HRMS (ESI-TOF) Spectrum of Compounds **5ah1** and **5ah2**

## 2.5 Details for Single Crystal X-ray Analysis

The structure of **3a** and **2a** were determined by the X ray diffraction. Recrystallized from acetone. Further information can be found in the CIF file. These crystals were deposited in the Cambridge Crystallographic Data Centre and assigned as CCDC 2113590 and CCDC 2113591. The checkCIF reports were obtained via the International Union of Crystallography's (IUCr)

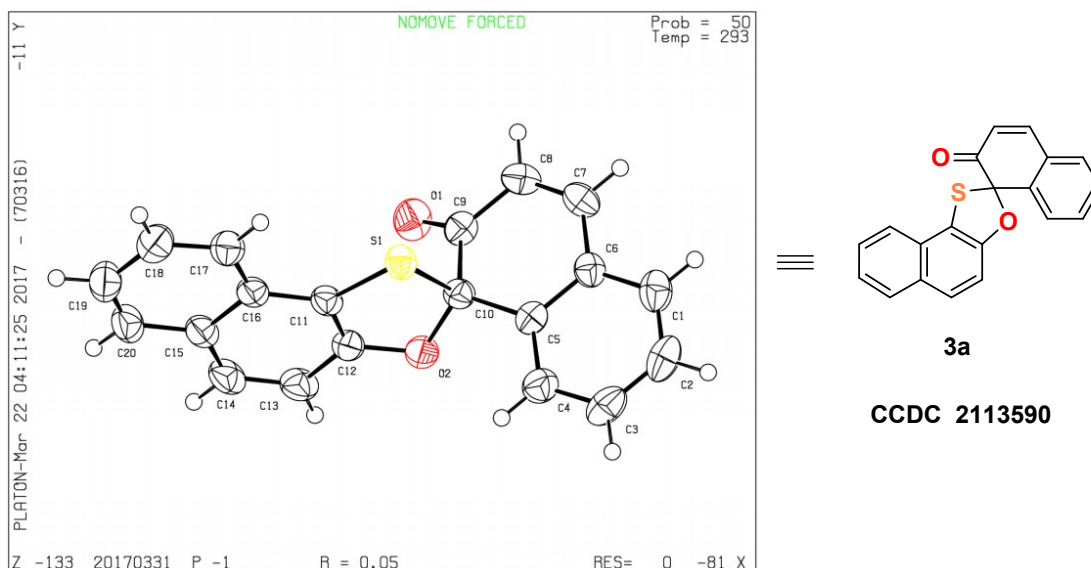

Figure S149. X-ray crystal structure of **3a** with the ellipsoid contour at 50% probability levels.<sup>8</sup>



**Table S8.** Crystal data and structure refinement for 20170331 (**3a**).

**Datablock: 20170331**

Bond precision: C-C = 0.0030 Å Wavelength=0.71073  
Cell: a=8.3023(5) b=9.0644(7) c=10.6356(10)  
alpha=99.420(7) beta=93.883(6) gamma=108.503(7)  
Temperature: 293 K

|                        | Calculated   | Reported     |
|------------------------|--------------|--------------|
| Volume                 | 742.63(11)   | 742.63(11)   |
| Space group            | P -1         | P -1         |
| Hall group             | -P 1         | -P 1         |
| Moiety formula         | C20 H12 O2 S | C20 H12 O2 S |
| Sum formula            | C20 H12 O2 S | C20 H12 O2 S |
| Mr                     | 316.36       | 316.36       |
| Dx, g cm <sup>-3</sup> | 1.415        | 1.415        |
| Z                      | 2            | 2            |
| Mu (mm <sup>-1</sup> ) | 0.225        | 0.225        |
| F000                   | 328.0        | 328.0        |
| F000'                  | 328.39       |              |
| h, k, lmax             | 11, 12, 14   | 11, 12, 14   |
| Nref                   | 4053         | 3428         |
| Tmin, Tmax             | 0.955, 0.965 | 0.950, 1.000 |
| Tmin'                  | 0.954        |              |

Correction method= # Reported T Limits: Tmin=0.950 Tmax=1.000  
AbsCorr = MULTI-SCAN

Data completeness= 0.846 Theta(max)= 29.264

R(reflections)= 0.0467( 2603) wR2(reflections)=  
S = 1.040 Npar= 208 0.1144( 3428)

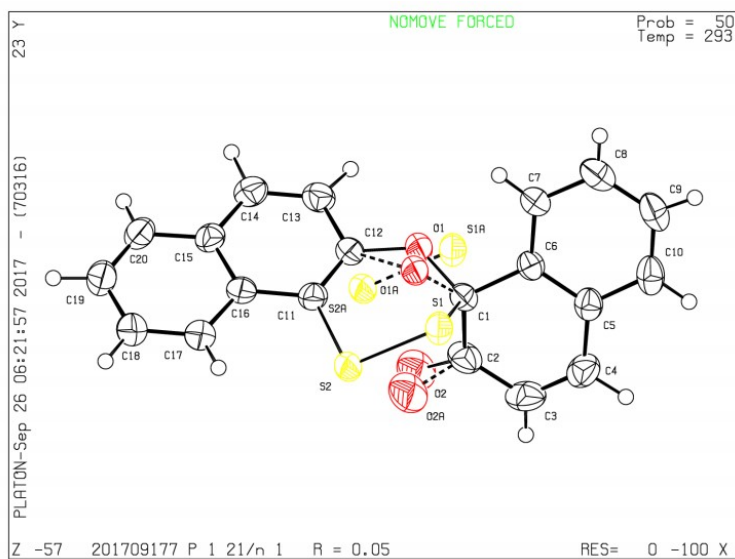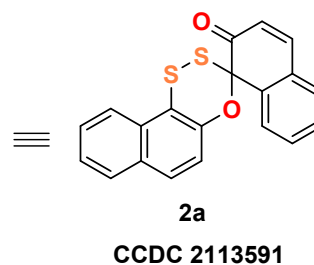

**Figure S150.** X-ray crystal structure of **2a** with the ellipsoid contour at 50% probability levels

**Table S9. Crystal data and structure refinement for 201709117 (2a).**

| <b>Datablock: 201709177</b>                                   |                              |                    |                |
|---------------------------------------------------------------|------------------------------|--------------------|----------------|
| Bond precision:                                               | C-C = 0.0048 Å               | Wavelength=1.54184 |                |
| Cell:                                                         | a=9.1135 (4)                 | b=6.4959 (3)       | c=26.5272 (12) |
|                                                               | alpha=90                     | beta=92.726 (4)    | gamma=90       |
| Temperature:                                                  | 293 K                        |                    |                |
|                                                               | Calculated                   | Reported           |                |
| Volume                                                        | 1568.64 (12)                 | 1568.65 (13)       |                |
| Space group                                                   | P 21/n                       | P 1 21/n 1         |                |
| Hall group                                                    | -P 2yn                       | -P 2yn             |                |
| Moiety formula                                                | C20 H12 O2 S1.91, 0.044 (S2) | C20 H12 O2 S2      |                |
| Sum formula                                                   | C20 H12 O2 S2                | C20 H12 O2 S2      |                |
| Mr                                                            | 348.42                       | 348.42             |                |
| Dx, g cm <sup>-3</sup>                                        | 1.475                        | 1.475              |                |
| Z                                                             | 4                            | 4                  |                |
| Mu (mm <sup>-1</sup> )                                        | 3.150                        | 3.150              |                |
| F000                                                          | 720.0                        | 720.0              |                |
| F000'                                                         | 724.45                       |                    |                |
| h,k,lmax                                                      | 10,7,31                      | 10,7,31            |                |
| Nref                                                          | 2797                         | 2786               |                |
| Tmin,Tmax                                                     | 0.596,0.664                  | 0.857,1.000        |                |
| Tmin'                                                         | 0.540                        |                    |                |
| Correction method= # Reported T Limits: Tmin=0.857 Tmax=1.000 |                              |                    |                |
| AbsCorr = MULTI-SCAN                                          |                              |                    |                |
| Data completeness=                                            | 0.996                        | Theta(max)= 67.076 |                |
| R(reflections)=                                               | 0.0520 ( 2327)               | wR2(reflections)=  |                |
|                                                               |                              | 0.1427 ( 2786)     |                |
| S =                                                           | 1.097                        | Npar= 266          |                |

### 3. References

- [1] H. A. Stevenson and S. Smiles, *J. Chem. Soc.* 1930, 1740.
- [2] J. A. C. McClell and S. Smiles, *J. Chem. Soc.* 1933, 786.
- [3] G. Capozzi, C. Falciani, S. Menichetti and C. Nativi, *J. Org. Chem.* 1997, **62**, 2611
- [4] C. Viglianisi, A. Sinni and S. Menichetti, *Heteroatom Chem.* 2014, **25**, 361.
- [5] G. Capozzi, S. Menichetti, C. Nativi, M. C. Simonti, *Tetrahedron Lett.* 1994, **35**, 9451.
- [6] G. Capozzi, A. Corti, S. Menichetti, and C. Nativi. *Tetrahedron* 1996, **52**, 12233.
- [7] (a) W. K. Wong-Ng, S. C. Nyburg, *Acta Cryst.* 1978, **B34**, 2910. (b) P.-T. Cheng and S. C. Nyburg, *Acta Cryst.* 1978. **B34**, 2907.
